# Supplementary material for: Strengthening integration of chronic care in Africa: protocol for the qualitative process evaluation of integrated HIV, diabetes and hypertension care in a cluster randomised controlled trial in Tanzania and Uganda
Source: PubMed Central journal article supplement (PMC7542920; doi:10.1136/bmjopen-2020-039237), 2020-10-07
Supplement: bmjopen-2020-039237.draft_revisions.pdf [file bmjopen-2020-039237.draft_revisions.pdf]

# BMJ Open

BMJ Open is committed to open peer review. As part of this commitment we make the peer review history of every article we publish publicly available.

When an article is published we post the peer reviewers' comments and the authors' responses online. We also post the versions of the paper that were used during peer review. These are the versions that the peer review comments apply to.

The versions of the paper that follow are the versions that were submitted during the peer review process. They are not the versions of record or the final published versions. They should not be cited or distributed as the published version of this manuscript.

BMJ Open is an open access journal and the full, final, typeset and author-corrected version of record of the manuscript is available on our site with no access controls, subscription charges or pay-per-view fees (<http://bmjopen.bmj.com>).

If you have any questions on BMJ Open's open peer review process please email [info.bmjopen@bmj.com](mailto:info.bmjopen@bmj.com)

# BMJ Open

## Strengthening integration of chronic care in Africa: protocol for the qualitative process evaluation of the integrating and decentralising HIV, diabetes and hypertension cluster randomised controlled trial in Uganda and Tanzania

|                               |                                                                                                                                                                                                                                                                                                                                                                                                                                                                                                                                                                                                                                                                                                                                                                                                                  |
|-------------------------------|------------------------------------------------------------------------------------------------------------------------------------------------------------------------------------------------------------------------------------------------------------------------------------------------------------------------------------------------------------------------------------------------------------------------------------------------------------------------------------------------------------------------------------------------------------------------------------------------------------------------------------------------------------------------------------------------------------------------------------------------------------------------------------------------------------------|
| Journal:                      | <i>BMJ Open</i>                                                                                                                                                                                                                                                                                                                                                                                                                                                                                                                                                                                                                                                                                                                                                                                                  |
| Manuscript ID                 | bmjopen-2020-039237                                                                                                                                                                                                                                                                                                                                                                                                                                                                                                                                                                                                                                                                                                                                                                                              |
| Article Type:                 | Protocol                                                                                                                                                                                                                                                                                                                                                                                                                                                                                                                                                                                                                                                                                                                                                                                                         |
| Date Submitted by the Author: | 09-Apr-2020                                                                                                                                                                                                                                                                                                                                                                                                                                                                                                                                                                                                                                                                                                                                                                                                      |
| Complete List of Authors:     | <p>Van Hout, Marie-Claire; Liverpool John Moores University, Public Health Institute<br/>         Bachmann, Max; University of East Anglia Faculty of Medicine and Health Sciences, Norwich Medical School<br/>         Lazarus, Jeffrey; Instituto de Salud Global de Barcelona, Hospital Clínic, University of Barcelona;<br/>         Shayo, Elizabeth<br/>         Bukenya, Dominic<br/>         Picchio, Camila; Barcelona Institute for Global Health (ISGlobal), Hospital Clinic, University of Barcelona, Barcelona, Spain<br/>         Nyirenda, Moffat; London School of Hygiene and Tropical Medicine, Mfinanga, Sayoki<br/>         Birungi, Josephine<br/>         Okebe, Joseph<br/>         Jaffar, Shabbar; Liverpool School of Tropical Medicine, Department of International Public Health</p> |
| Keywords:                     | <p>Hypertension &lt; CARDIOLOGY, DIABETES &amp; ENDOCRINOLOGY,<br/>         International health services &lt; HEALTH SERVICES ADMINISTRATION &amp; MANAGEMENT, Organisation of health services &lt; HEALTH SERVICES ADMINISTRATION &amp; MANAGEMENT</p>                                                                                                                                                                                                                                                                                                                                                                                                                                                                                                                                                         |
|                               |                                                                                                                                                                                                                                                                                                                                                                                                                                                                                                                                                                                                                                                                                                                                                                                                                  |

SCHOLARONE™  
Manuscripts

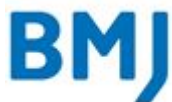

I, the Submitting Author has the right to grant and does grant on behalf of all authors of the Work (as defined in the below author licence), an exclusive licence and/or a non-exclusive licence for contributions from authors who are: i) UK Crown employees; ii) where BMJ has agreed a CC-BY licence shall apply, and/or iii) in accordance with the terms applicable for US Federal Government officers or employees acting as part of their official duties; on a worldwide, perpetual, irrevocable, royalty-free basis to BMJ Publishing Group Ltd ("BMJ") its licensees and where the relevant Journal is co-owned by BMJ to the co-owners of the Journal, to publish the Work in this journal and any other BMJ products and to exploit all rights, as set out in our [licence](#).

The Submitting Author accepts and understands that any supply made under these terms is made by BMJ to the Submitting Author unless you are acting as an employee on behalf of your employer or a postgraduate student of an affiliated institution which is paying any applicable article publishing charge ("APC") for Open Access articles. Where the Submitting Author wishes to make the Work available on an Open Access basis (and intends to pay the relevant APC), the terms of reuse of such Open Access shall be governed by a Creative Commons licence – details of these licences and which [Creative Commons](#) licence will apply to this Work are set out in our licence referred to above.

Other than as permitted in any relevant BMJ Author's Self Archiving Policies, I confirm this Work has not been accepted for publication elsewhere, is not being considered for publication elsewhere and does not duplicate material already published. I confirm all authors consent to publication of this Work and authorise the granting of this licence.

**Title**

Strengthening integration of chronic care in Africa: protocol for the qualitative process evaluation of the integrating and decentralising HIV, diabetes and hypertension cluster randomised controlled trial in Uganda and Tanzania

**Author Listing**

Marie Claire Van Hout, Liverpool John Moores University, United Kingdom

Max Bachmann, University of East Anglia, United Kingdom

Jeffrey V Lazarus, Barcelona Institute for Global Health (ISGlobal), Hospital Clínic, University of Barcelona, Spain

Elizabeth H. Shayp, National Institute for Medical Research, Tanzania

Dominic Bukenya, MRC/UVRI/LSHTM Uganda Research Unit, Uganda

Camila A Picchio, Barcelona Institute for Global Health (ISGlobal), Hospital Clínic, University of Barcelona, Spain

Moffat Nyirenda Medical Research Council Uganda, Uganda

Sayoki Mfinanga, National Institute for Medical Research and Liverpool School of Tropical Medicine, Liverpool, United Kingdom, and Muhimbili University of Health and Allied Sciences, Tanzania

Josephine Birungi, Medical Research Council/Uganda Virus Research Institute & London School of Hygiene and Tropical Medicine (MRC/UVRI & LSHTM), Uganda

Joseph. Okebe, Liverpool School of Tropical Medicine, United Kingdom

Shabbar Jaffar, Liverpool School of Tropical Medicine, United Kingdom

**Corresponding Author:**

Professor Marie Claire Van Hout, Public Health Institute, Exchange Station, Liverpool John Moores University, Liverpool L32ET, United Kingdom. Email: [m.c.vanhout@ljmu.ac.uk](mailto:m.c.vanhout@ljmu.ac.uk)

**Article Type:** Protocol

## Abstract

**Introduction** In sub-Saharan Africa (SSA), the burden of non-communicable diseases (NCDs), particularly diabetes mellitus (DM) and hypertension, has increased rapidly in recent years, although HIV infections remain a leading cause of death among young-middle aged adults. Health service coverage for NCDs remains very low in contrast to HIV, despite increasing prevalence of co-morbidity of NCDs with HIV. There is an urgent need to expand healthcare capacity to provide integrated services to address these chronic conditions.

**Methods and Analysis:** This protocol describes procedures for a qualitative process evaluation of the INTE-AFRICA, a cluster-randomised trial comparing integrated health service provision for HIV-infection, DM and hypertension, to the current stand-alone vertical care. Interviews, focus group discussions and observations of consultations and other care processes in two clinics (Tanzania, Uganda) will be used to explore the experiences of stakeholders (service users, policy makers, healthcare providers, community leaders and members, researchers, non-governmental (NGO) and international organisations) during implementation alongside an understanding of the impact of broader structural and contextual factors.

**Ethics and Dissemination:** Ethical approval has been granted by Liverpool School of Tropical Medicine (UK), the National Institute of Medical Research (Tanzania) and Medical Research Council (Uganda). The evaluation will provide the opportunity to document implementation of integration over several time points (six, 12 and 18 months) and refine integrated service provision prior to scale-up. This synergistic approach to evaluate, understand and respond will support service integration and inform monitoring, policy and practice development efforts to involve and educate communities in Uganda and Tanzania. It will create a model of care and a platform of best practices and lessons learnt for other countries implementing integrated and decentralised community health services.

## Key Words

Health service delivery, Non communicable disease, HIV, integration, task-shifting, sub-Saharan Africa

## Article Summary: Strengths and Limitations of this study

- Whilst HIV continues to be the leading cause of death among young-middle aged adults in sub-Saharan Africa (SSA), the burden of non-communicable diseases (NCDs) has increased rapidly in recent years, particularly diabetes mellitus and hypertension,
- There is an urgent need to expand the capacity of healthcare systems to manage NCDs, either alongside or integrated with HIV.
- Implementation of INTE-AFRICA in Tanzania and Uganda is complex, requiring concurrent process evaluation to understand and document stakeholders experiences, attitudes, and practices during implementation, and to understand the impact of structural and contextual factors on implementation.
- Limitations of the process evaluation may centre on patient drop out, characteristics of the two selected sites and other external mitigating factors.

## BACKGROUND

The non-communicable disease (NCD) burden is increasing globally and poses a serious public health threat, with type 2 diabetes mellitus (DM) and hypertension contributing to about 9.4 million deaths annually,<sup>1-3</sup> in addition to long-term illness and disability. Over three-quarters of global NCD mortality and the majority of premature deaths occur in low- and middle-income countries (LMICs).<sup>4,5</sup> The International Diabetes Federation has projected that incidence of DM will increase from 415 million in 2015 to 642 million by 2040, and over 70% of cases will be in LMICs.<sup>6</sup> People living with HIV may have increased risks of developing hypertension and DM, with prevalence rates exceeding 5% and 20-30%, respectively.<sup>7</sup> HIV/AIDS remains a major cause of morbidity and mortality among young-middle aged adults in sub-Saharan Africa (SSA), but the region is also experiencing a rapidly rising burden of NCDs (particularly DM and hypertension), rise to a dual HIV-NCD epidemic.<sup>8-10</sup> While lifestyle changes associated with urbanisation and globalization (such as eating habits and lack of physical exercise) underpin the ongoing demographic and epidemiologic transition toward increasing NCDs, these changes also effect chronic infections (such as HIV), resultant inflammation and antiretroviral therapy <sup>8-10</sup> About 65% of people estimated to be living with HIV-infection in Africa are in regular HIV care; and this number is rising.<sup>11</sup> Chronic conditions requiring lifelong regular care, however, have an equal or higher burden than acute infections, with hypertension representing the single largest risk factor for death, and DM which has seen a massive increase in prevalence in a short period of time.<sup>1 9 12 13 1</sup> Patient populations are increasingly demonstrating younger age of onset, and comorbidity conditions of NCDs with HIV, and the impact of NCDs is particularly severe in populations affected by poverty in SSA.<sup>10 15-18</sup>

The majority of the healthcare systems in LMICs, particularly those in Africa, are already overburdened. Moreover, they are ill-prepared to provide chronic care required for most NCDs, since they were designed for episodic care to manage acute infection (e.g. malaria). However, since 2003, significant global investment and development partner engagement has facilitated the establishment of HIV screening and treatment programmes as the first large-scale chronic disease initiatives in Africa. Within these programmes, health services for HIV are typically stand-alone and vertically delivered. They are also often combined with decentralisation and task-shifting, which has enabled primary health centres to treat large numbers of patients while allowing non-clinically qualified health workers to play a major role in supporting patients on HIV treatment. In contrast, health service coverage for NCDs remains very low.<sup>9 19</sup> Coordinated national NCD control and care programmes are relatively new with significant gaps in funding and operational evidence for program implementation.<sup>18 20</sup> For example, fewer than 5% of persons with DM are thought to be in regular diabetes care, and the figure is likely to be similar for persons with hypertension.<sup>9 15 18</sup> For those in care, health service provision for the diagnosis and management of diabetes and hypertension is insufficient.<sup>9 19 21-24</sup> The expansion of and improvements in antiretroviral therapy (ART) has decreased HIV-related morbidity and

1  
2  
3 mortality and contributed to increased survival rate. However, this population is now at risk of  
4 developing NCDs, which will diminish the gains from the scale-up of HIV care services.<sup>25</sup>  
5  
6  
7

8 It is important to learn from and leverage HIV services to improve care for persons with NCDs. There  
9 is an urgent need to expand the capacity of healthcare systems to provide services for NCDs, either  
10 alongside, or preferably integrated, with HIV.<sup>26</sup> DM, hypertension and HIV-infection require lifelong  
11 care. Key challenges in Africa are linkage and retention in care, access and adherence to ART and  
12 promotion of healthy behaviours.<sup>27 28</sup> Addressing these challenges requires a common approach, yet  
13 current services are primarily stand alone and vertically delivered in clinics within district hospitals or  
14 larger primary care facilities. Additionally, duplication of services and crippling costs of accessing  
15 health services for patients (typically 10-30% of monthly income) are major factors in patient drop-  
16 out. As such, the infrastructure and lessons learnt from the HIV chronic disease prevention, testing  
17 and care model can serve as important resources for the expansion of NCD prevention, care and  
18 treatment. HIV chronic care management pathways, resources and infrastructure can be leveraged to  
19 integrate with newly developing NCD services, which would strengthen the platform for NCD  
20 services delivery.<sup>29-31</sup> Health systems have developed experience managing HIV as a chronic disease,  
21 including linking and retaining patients in care and supporting treatment adherence in drugs,  
22 diagnostics procurement and other key health systems indicators.<sup>28 32-34</sup> Integration of services would  
23 therefore reduce duplication and fragmentation of services and could mean that these practices can be  
24 applied quickly to NCD control. This will enable effective management of DM and hypertension,  
25 prevention of complications, cost savings to the health system and greater access to services and  
26 clinical management (e.g. drug-drug interactions, adherence and support) for co-morbid or multi-  
27 morbid patients. See **Figure One**. HIV, diabetes and hypertension are common and many people in  
28 communities will have two or more chronic conditions, known as multi-morbidity. For these  
29 individuals, a single integrated clinic that can cater for multiple (common) conditions would be  
30 hugely beneficial both in terms of them accessing health care and also in considering clinical  
31 management (e.g. drug-drug interactions, adherence and support).  
32  
33  
34  
35  
36  
37  
38  
39  
40  
41  
42  
43  
44  
45  
46  
47

48 **Insert Figure One ‘Potential benefits of integrating diabetes, hypertension and HIV services for**  
49 **a) DM and hypertension control, and b HIV control’ about here**  
50  
51

52 Despite the increase in academic and clinical interest in HIV/NCD integration in SSA,<sup>16 33 35-40</sup> there  
53 remains little evidence about integration in terms of both scope and generalizability as evidence is  
54 limited to small scale feasibility studies in largely different contexts.<sup>41-47</sup> The lack of large scale or  
55 randomized and/or controlled evaluations and context-specific clinical, cost effectiveness and process  
56 outcomes data constrains policymaking and development of integrated care models, which strengthen  
57 health systems and are tailored to the distinct needs of each specific SSA country. SSA policy  
58  
59  
60

1  
2  
3 frameworks identify three forms of integration: i) integration of HIV/AIDS and NCD responses into  
4 the health system, ii) integration within HIV/AIDS or NCD response (intra-), and iii) integration  
5 between HIV/AIDS and NCD responses (inter-), and within the latter, *full* integration of HIV/NCD  
6 care services into a chronic disease clinic; *partial* integration of certain aspects of NCD care such as  
7 screening for NCD risk factors into HIV interventions; or *adaptation* of HIV strategies, systems and  
8 tools for NCD care without actual service integration.<sup>26 28 44</sup> There is however a lack of large scale or  
9 randomized and/or controlled evaluations, as well as a lack of context specific clinical, cost  
10 effectiveness and process outcomes data. This evidence is paramount to inform policy, government  
11 resource prioritisation, and to develop integrated care models which strengthen health systems best  
12 suited to the needs of that specific SSA country. We present here on the qualitative process  
13 evaluation protocol designed to evaluate INTE-AFRICA, a European Commission Horizon 2020  
14 funded implementation research project (protocol number 19-100) operating in Uganda and Tanzania.  
15  
16  
17  
18  
19  
20  
21  
22  
23

### 24 ***The INTE-AFRICA Project***

25 The aim of INTE-AFRICA is to implement and assess the effectiveness of integration of HIV, DM  
26 and hypertension services at the point of service delivery covering many health facilities where  
27 common approaches to clinical decision-making, drug procurement and human resource management  
28 occur. The project will generate the research evidence needed by the health service in Uganda,  
29 Tanzania and potentially the rest of Africa, to scale-up and sustain the chronic disease management  
30 and services in an integrated manner. We recognise that stigma and discrimination associated with  
31 HIV may prevent people from accessing health services.<sup>48</sup> Likewise, persons with DM and  
32 hypertension may be reluctant to attend clinics where HIV-infected persons are seeking care either  
33 because of the stigma associated with HIV-infection or for other reasons – e.g. because of fear of  
34 contracting infection. Nonetheless, managing HIV-infection, like any other chronic condition, could  
35 reduce the stigma, thus facilitating increased access to HIV services as well as improved NCD  
36 control.  
37  
38  
39  
40  
41  
42  
43  
44  
45

46 Tanzania and Uganda were specifically chosen as they are low-income and their public and private  
47 health facilities are strongly committed to providing services for NCD. However, their health systems  
48 struggle to scale-up provision for diabetes and hypertension in the face of competing health demands,  
49 including HIV-infection. See **Table One**. Tanzania and Uganda also share relevant characteristics  
50 with other low-income countries, especially in sub-Saharan Africa. The process evaluation has the  
51 potential to enhance the generalisability of integrated care to other similar settings by providing  
52 understanding of the determinants and mechanisms of the implementation process.  
53  
54  
55  
56  
57

58 Insert **Table One ‘Key data on the country settings’** about here  
59  
60



1  
2  
3 Our programme is underpinned by a participatory, multi-actor approach which supports dialogue,  
4 knowledge exchange, fosters mutual understanding and provides input in policy agendas around  
5 diagnosis and treatment of DM, hypertension and HIV in an integrated clinic. The INTE-AFRICA  
6 conceptual framework is illustrated in **Figure Two**.  
7  
8  
9

10  
11 Insert **Figure Two ‘INTEAFRICA Conceptual Model’** about here  
12  
13

14 INTE-AFRICA will test integrated health services at primary care centres for HIV-infection, diabetes  
15 and hypertension, by providing a “*One stop shop*” integrated care clinic for these conditions (the  
16 intervention). We will conduct a pragmatic parallel arm cluster-randomised trial: 32 urban health  
17 facilities in the two countries will be randomised, with 16 facilities allocated to deliver the  
18 intervention immediately (intervention arm), and 16 facilities to continue with usual care (control  
19 arm). In both arms, the clinic staff will receive refresher training in DM and hypertension  
20 management to enable all healthcare staff to deliver the same standard of care to all patients. At each  
21 selected facility, cohorts of approximately 220 patients; 110 HIV infected and 110 NCD patients, will  
22 be enrolled to evaluate the primary outcomes. Both integrated and vertical health delivery approaches  
23 will run concurrently. The primary care facilities will initiate and stabilise patients on treatment,  
24 manage complications (including referral to higher facilities) and conduct clinical and laboratory  
25 monitoring of patients for all three conditions. Specific characteristics of integrated care in each clinic  
26 are: ‘*One stop shop*’ with concurrent management of HIV, hypertension and DM in the same facility;  
27 management of patients with HIV, hypertension and DM by the same clinician or team of clinicians  
28 (nurses, counsellors other staff); integrated training of clinicians; single waiting area and queue;  
29 integrated health education about all three conditions; one pharmacy with a single drug dispensing  
30 point; similar testing, and cross-testing, for diagnosis and monitoring with requisition of laboratory  
31 tests in the same place; and similar format of paper medical records for each condition kept in the  
32 same patient folder. Patients who decline to participate in the research and trial participants in control  
33 arm clinics will continue to receive standard vertical health care delivery. Inclusion criteria for  
34 participation are: being over 18 years old; having confirmed HIV-infection, diabetes or hypertension;  
35 living within the catchment population of the health facility; likely to remain in the catchment  
36 population for six months and willing to provide written informed consent. Very ill patients requiring  
37 in-patient care will be excluded. Participants will be observed by the research team during clinic visits  
38 with additional reviews at six and 12 months. Further details are provided in the trial protocol.  
39  
40  
41  
42  
43  
44  
45  
46  
47  
48  
49  
50  
51  
52  
53

#### 54 ***Qualitative Process Evaluation of the INTE AFRICA trial***

55 Process evaluations typically evaluate how and whether interventions are delivered as intended and  
56 whether such implementation is congruent with the theory underpinning the intervention.<sup>32 50-52</sup>  
57 Updated Medical Research Council (MRC) guidance for evaluation of complex health interventions  
58  
59  
60

1  
2  
3 has recently recognised the value of process evaluation within trials stating, “*it can be used to assess*  
4 *fidelity and quality of implementation, clarify causal mechanisms and identify contextual factors*  
5 *associated with variation in outcomes.*”<sup>32</sup>The process evaluation in INTE-AFRICA is particularly  
6 focused on context, description of the intervention and its causal assumptions, implementation,  
7 mechanisms of impact and outcomes.<sup>32</sup> Further we evaluate the extent to which resources and  
8 activities supporting the intervention function to deliver intended outputs, with subsequent  
9 improvements in outcomes. A central focus lies in identifying contextually relevant strategies for  
10 successful implementation, and practical difficulties in adoption, delivery and maintenance to inform  
11 wider implementation.<sup>53</sup> We recognise that outcomes (e.g. knowledge gained) of INTE-AFRICA are  
12 dependent on understanding cultures and contexts of the stakeholders (i.e. service users, healthcare  
13 providers, policy makers, community leaders/members, non-governmental organisations (NGO),  
14 international organisations, and clinical researchers) involved and those surrounding service design  
15 and delivery as well as care seeking practices. The role of social and behavioural science approaches  
16 is central to this process evaluation. It aims to enhance understanding of issues related to the NCD and  
17 HIV agendas and service delivery approaches from all perspectives and stakeholders along the  
18 integration process. INTE-AFRICA will utilise a broad social behavioural approach to support  
19 community engagement in research in Uganda and Tanzania, going beyond clinical trial recruitment  
20 and retention to improve NCD/ HIV literacy. Behavioural and social science research strategies<sup>54</sup> will  
21 allow NCD and HIV related research to place the needs and perspectives of people living with NCD  
22 and/or HIV at the centre of the progression of clinical studies, such as INTE-AFRICA, and investigate  
23 participant motivations and decision-making processes related to preferences for or participation in  
24 different types of integrated and decentralised services.  
25  
26  
27  
28  
29  
30  
31  
32  
33  
34  
35  
36  
37  
38

39 Process evaluation design, like healthcare interventions, requires a theoretical framework to structure  
40 the evaluation across sites. We draw here on Bronfenbrenner’s ecological model of behaviour<sup>55 56</sup> to  
41 conceptualise integrated care as events that disrupt complex social systems<sup>57</sup> operating across multiple  
42 contextual levels. We are interested in better understanding the importance of context, which becomes  
43 especially relevant when comparing Tanzania and Uganda. According to the Bronfenbrenner model,  
44 contextual factors are evaluated at the **macro** (universal vs partial coverage; free primary healthcare  
45 and drugs, and users fees; fiscal policy); **meso** (drug ordering and drug delivery systems, health  
46 worker education and employment, community understanding and perspectives on multi-morbidity);  
47 and **micro** (clinic level management, resources, service user experience) levels. See **Figure Three**.  
48 These contextual factors, likely to influence implementation and their effects, will be investigated to  
49 capture variation in adoption, delivery and maintenance outcomes as well as responses to the  
50 intervention. This will affect both reach and fidelity, which are hypothesised to be important factors in  
51 outcome differences.  
52  
53  
54  
55  
56  
57  
58  
59  
60

1  
2  
3 Insert **Figure Three ‘Potential contextual influences on INTE AFRICA programme**  
4 **implementation cascade’** about here  
5  
6  
7

8 To situate INTE-AFRICA within this theoretical framework, we will develop a logic model. This  
9 model will set out contextual determinants of HIV and NCD illness management in SSA and assess  
10 how integrated care components function to address these determinants to improve outcomes in the  
11 management of patients. See **Table Two**.  
12  
13  
14

15  
16 Insert **Table Two ‘Logic Model of programme inputs, processes and outcomes’** about here  
17  
18

## 19 **METHODS**

### 20 ***Overall Design***

21 This protocol describes procedures for a qualitative process evaluation of the INTE-AFRICA  
22 pragmatic parallel arm cluster-randomised trial comparing integrated health service provision for  
23 HIV-infection, DM and hypertension with the current standard vertical care delivery model. The aims  
24 of this qualitative process evaluation are to explore the experiences, attitudes and practices of a wide  
25 variety of stakeholders during the process of programme implementation and to develop an  
26 understanding of the impact of broader structural and contextual factors on the implementation  
27 process. The process evaluation works in tandem with the collection of selected clinical outcomes  
28 (e.g. clinical efficacy of different treatments) and health economic data (e.g. costs and benefits of  
29 different approaches) to estimate the potential benefits to patients and health services at clinic and  
30 country level (protocol reported elsewhere). It will use three qualitative research techniques: in-depth  
31 interviews with stakeholders (service user, healthcare provider, policy maker, non-governmental  
32 organisation (NGO)/international organisation, and clinical researcher); focus group discussions  
33 (FGD) with community leaders and community members; and clinic-based observations in one site  
34 per country. This design permits an assessment of the fidelity of INTE-AFRICA’s implementation, a  
35 detailed description of the processes, relationships, and contexts involved in the delivery of integrated  
36 care, and the identification of factors attributing to the failure or success of the programme. It thus  
37 addresses the ‘black box’ problem in interpreting trial results by improving understanding of the  
38 mechanisms that connect particular intervention components to particular outcomes.<sup>58</sup> The chosen  
39 approach will enhance social construction and acceptability of chosen decentralised integrated  
40 approaches, link outcomes to policy and advocacy and impact sustainability of HIV, DM and  
41 hypertension chronic disease service integration in two LMIC countries. It provides the opportunity to  
42 document and refine INTE-AFRICA activities prior to a larger pragmatic trial or scale-up by Uganda  
43 and Tanzanian governments. These synergistic approaches to evaluate, understand and respond will  
44 support integration, inform surveillance, policy and practice development and improve efforts to  
45 involve and educate communities in Uganda and Tanzania. It will create a model and a platform of  
46  
47  
48  
49  
50  
51  
52  
53  
54  
55  
56  
57  
58  
59  
60

1  
2  
3 best practices and lessons learnt for other countries implementing integrated and decentralised  
4 community health services for HIV and chronic disease. The process evaluation methods for each  
5 objective are described in **Table Three**, including how each method maps onto the three different  
6 contextual levels.  
7  
8  
9

10  
11 Insert **Table Three: ‘Process Evaluation Design and data collection framework’** about here.  
12  
13

### 14 ***Public and Patient Involvement***

15  
16 Public and patient involvement (PPI) throughout a programme of research enhances research quality  
17 and relevance by providing different perspectives and a sense of ownership. This protocol will adhere  
18 to the same principles, and will allow the voice of ‘service users’ and those affected to be heard, and  
19 utilised. Key stakeholders such as service users and their families will be fully involved in guiding the  
20 research, acting as research participants, and in implementation of change in health service delivery  
21 and integrated care planning. All aspects of the process evaluation are underpinned by participatory  
22 action health research and its success and usefulness will be grounded in PPI, participation and  
23 engagement in the form of patient/professional identification of research priorities, collaborations and  
24 partnerships, expert steering, community participation around health needs and optimal integrated  
25 services, awareness raising activities, development of print materials, toolkits and training for  
26 healthcare professionals.  
27  
28  
29  
30  
31  
32  
33

### 34 ***Data collection***

35  
36 We will use the Empirical Phenomenological Psychological (EPP) five-step method,<sup>59</sup> which  
37 combines psychological, interpretative and idiographic components, to gain understanding of the  
38 complex social processes, of social, aged, gendered and culturally/community specific meanings and  
39 of incremental understanding of the distinct lived experience of policy makers, service users, health  
40 care providers, researchers and communities. We will balance the description of phenomena with  
41 interpretation of insights and are cognisant of participant experiential phenomena and authors’  
42 interpretation of associated meanings. It will yield an in-depth socio-cultural understanding of service  
43 user/participant reported outcomes, their motivations, preferences, beliefs, expectations, identities,  
44 hopes and views on conditions, related stigma and of decision-making processes. This will provide  
45 better understanding of stakeholder and community positioning during integration. This understanding  
46 will inform policy and practice, ensure effective service user education, position service users and  
47 their families to understand these conditions and interpret study outcomes and facilitate future HIV  
48 and chronic disease clinical studies.  
49  
50  
51  
52  
53  
54  
55  
56

57  
58 Both descriptive patient level data and rich socio-behavioural qualitative data will be collected by a  
59 team of trained researchers in Tanzania and Uganda. Data collection will entail exploring the  
60

1  
2  
3 experiences, attitudes and practices of a wide variety of stakeholders during the process of INTE-  
4 AFRICA programme implementation and will develop an understanding of the impact of broader  
5 structural and contextual factors on the implementation process.<sup>17 53</sup>We will collect data on social  
6 behavioural and cultural aspects impacting implementation (e.g. individual and community health  
7 risks, protective behaviours and health responses) within the broader social and political frameworks,  
8 the practicalities of accessing, providing and sustaining integrated services (e.g. staff time, resources,  
9 equity of access, catchment area/populations, quality of care, waiting room dynamics, record keeping  
10 and retention across multi/co-morbidities, training gaps); and process indicators (e.g. perceived  
11 stigma, acceptability of vertical versus integrated service designs, lay knowledge and awareness and  
12 bottlenecks to accessing services). We will also describe implementation of the intervention in terms  
13 of fidelity to the intended model of care, adaptations to the intervention during implementation, and  
14 dose and reach of intervention components actually delivered and received (such as numbers and  
15 proportions of eligible staff who received integrated care training, numbers of proportions of patient  
16 participants who received all or most of their care from integrated services, and frequency of drug  
17 stock-outs)<sup>69</sup>. The latter data will be complemented by routinely collected quantitative data such as  
18 training attendance and medical records. We will document changes in healthcare provider roles,  
19 attitudes and patient relationships.

20  
21  
22 Interviews with service users and providers will include specific questions about their experience and  
23 management of individuals with multi-morbid HIV, hypertension and/or diabetes. These include  
24 service user, healthcare provider, and policymaker/senior manager perceptions of INTE-AFRICA;  
25 impacts of INTE-AFRICA on the provision of integrated HIV/AIDS care and NCD care, and  
26 relationships with NGO and international organisations; changes in health provider roles, attitudes,  
27 and patient relationships; impacts of the INTE-AFRICA implementation context on trial and health  
28 economic cost outcomes; impacts of the INTE-AFRICA intervention on an integrated health systems  
29 approach to care (medicine supplies, record keeping, service user education, clinical care pathways,  
30 data management, staff training); and barriers to and facilitators of change. The purposive samples of  
31 service users and providers (**Table 3**) will include those who live with or manage multi-morbidity.  
32 Selected patient outcomes will also be collected in order to estimate the potential benefits to patients  
33 and to health services. We will assume a more pragmatic approach when garnering perspectives from  
34 higher level stakeholders involved in health policy and practice generation, and NGO and  
35 international organisations (e.g. WHO Country offices, UNAIDS, PEPFAR, CDC) providing  
36 peripheral supports and guidance.

37  
38  
39 The data, when combined and triangulated across these stakeholder perspectives, will provide a '*thick*  
40 *description*', of how the intervention was delivered, maintained and experienced by stakeholders.<sup>17 53</sup>  
41 It will also offer explanations for observed variation over time and between countries, and detailed

1  
2  
3 insight into the interaction between different contextual features and components of integration of  
4 NCD or HIV/NCD services. It will also facilitate triangulation of information across stakeholders,  
5 clinics and countries. We envisage returning to these two clinics in the future, four years and six  
6 years after integration, to achieve a deeper understanding of processes and patient and provider  
7 experiences.  
8  
9  
10

### 11 ***Setting, study populations, and recruitment***

12  
13 This will be a cohort study taking place in one site per country, with the same participants interviewed  
14 at each time. 25 patients in each facility and 20 healthcare workers (10 in each facility) will be  
15 purposely selected and invited; at six, 12 and 18 months after the start of the trial, to reflect  
16 retrospectively on their experience of integration. See **Table Three**. These numbers are expected to  
17 reach saturation (i.e. the point that further information does not provide any additional variation in  
18 observed themes). We may replace participants if there is significant loss to follow up or refusal for  
19 repeated interviews. For instance, if a participant drops out at 12 months, we still have their six-month  
20 experience documented, and we can replace with a new participant, invited to reflect on their 12-  
21 month retrospective experience. Where possible we will gender match interviewers with participants  
22 (particularly patients). The following recruitment procedures will take place at each clinic.  
23  
24  
25  
26  
27  
28  
29

- 30 • Observations will be made in the *clinic* in consultation with the health facility and clinics in-  
31 charges.
- 32 • Recruitment of *service users* will be supported by clinic nurses who will identify and  
33 approach selected participants who have a minimum of six months experience of integration,  
34 and will be asked to consent to partake in an in-depth interview on the day they attend the  
35 clinic. INTE-AFRICA researchers will purposively sample women and men of different ages  
36 and explore any age/gender and condition ((HIV/hypertensive/diabetic/multi/co-morbid)  
37 related differences.
- 38 • *Health care providers* at the clinic (health facility managers and health professionals such as  
39 physicians, nurses, public health nurses) will be approached at the clinic to participate in an  
40 in-depth interview on the day the INTE-AFRICA team are scheduled to attend the clinic.
- 41 • *Ministerial policy makers and provincial/regional/district level clinical/health senior*  
42 *management* (directors for NCD, HIV and curative services) will be identified and requested  
43 to participate in a semi-structured interview (face to face or telephone).
- 44 • *NGO and international organisations* (for example WHO Country office, UNAIDS,  
45 PEPFAR, CDC) will be identified and requested to participate in a semi-structured interview  
46 (face to face or telephone).  
47  
48  
49  
50  
51  
52  
53  
54  
55  
56  
57  
58  
59  
60



- *Community leaders* will be identified in the clinic catchment areas by virtue of their position while *community members* will be identified in consultation with the community leaders and invited to participate in a FGD.
- *Clinical researchers* will be invited to participate in an in depth interview at the 24 month end point.

### ***Ethical considerations***

Ethical approval for the evaluation has been granted by the research ethics committees of the Liverpool School of Tropical Medicine (UK), the National Institute of Medical Research (Tanzania) and Medical Research Council (Uganda). The key ethical principles of voluntary and informed participation, confidentiality and safety of participants will be used in all researcher and participant interactions. Written consent for interviews and observations will be obtained from all participants. All participants will be provided with written information about the research, this will be explained verbally, and informed that their participation is voluntary and that they may withdraw from participation at any time. Safety and confidentiality of all data will be ensured by: (1) encrypting all transcriptions with a password protected code; (2) storing all data in a secure, encrypted database accessible only to authorised persons on the research team; (3) de-linking all personal information of participants from the data collected and stored and each participant have a unique identification number.

### ***Data analysis and synthesis***

The analysis of qualitative data will be iterative, moving between data collection and analysis to test emerging theories. Field notes of observations will be analysed thematically to provide a description of the process and content involved in adapting and delivering the intervention. Audio recordings of interviews and FGDs will be transcribed verbatim by competent and experienced social scientists, with a subsample transcribed using conversation analytic conventions. Translation from local languages (e.g. Swahili, Luganda) into English will be performed for easy sharing with the study partners. Translation will occur using a back translation method for consistency. An electronic data management package (e.g. NVivo) will be used to manage the qualitative data analysis at the respective country levels. The analysis of the observational data will require knowledge obtained from health professional interviews at different levels to compare how reported experience, and different accounts of patient and professional perspectives relate to actual implementation of INTE-AFRICA scenarios: i) when DM and hypertension services are integrated with HIV-infection services; and ii) comparing countries. Care will be taken to identify and follow up deviant cases which do not fit into emerging theories. Reliability and validity of the analysis is optimised through iterative data collection, the use of a multi-method design incorporating interviews, FGD and observations and the ongoing discussion of findings within the research team for scrutiny and feedback.<sup>60 61</sup>

1  
2  
3  
4  
5 The chosen phenomenological approach (EPP), usually used in psychological research, reveals the  
6 structures of subjective experience and meaning of a lived phenomenon (in first person point of view).  
7 It follows to some extent Husserl's principle of active efforts to "bracket out" the researchers'  
8 theoretical pre-understanding in the first steps of a text analysis<sup>59</sup>. The "bracketing", however, does  
9 not exclude an empathetic, psychological focus in the analysis on the experiences of the researched  
10 phenomenon as it is lived by the informant and what it means is to her or him. In the context of INTE-  
11 AFRICA, researchers in both countries will strive to get an empathetic understanding of the text, and  
12 hence do not apply their professional prior knowledge about integration.  
13  
14  
15  
16  
17  
18

19 We will conduct a stepwise analysis in five steps. **First**, the text will be read several times to get a  
20 good grasp of how the informant spoke about the researched phenomenon of integration. In this step,  
21 theoretical reflection will be withheld. **Second**, the whole text will be divided into meaning units of a  
22 whole paragraph or a single word. **Third**, the informant's personal language will be transformed, unit-  
23 by-unit, to the researchers' language. The researchers will discuss the transcription unit by unit. When  
24 different interpretations occur, the researchers will return to the interview text and discuss in a free,  
25 imaginative process until agreement can be reached through negotiated consensus. **Fourth**, the text  
26 will be screened in a search for comprehensive themes. The text will be interpreted with connection to  
27 the researchers' theoretical knowledge in an interchange between the original data, the transformed  
28 units and the researchers' theoretical pre-understanding about integration. The meaning units will be  
29 assorted into appropriate themes and thus constitute a general structure of the phenomenon of  
30 integrated care. **Fifth**, this essential structure will penetrate all the revealed themes and thus the  
31 meaning of the researched phenomenon of integrated care to the informant.  
32  
33  
34  
35  
36  
37  
38  
39  
40

41 We will add a further layer of triangulation of perspectives across stakeholders and across conditions  
42 (HIV/hypertension/DM/multi/co-morbidity) when raising the abstraction level. Triangulation of  
43 socio-behavioural qualitative and observational data, during analysis will occur in order to understand  
44 how different types of evidence enhance the overall interpretation of how INTE-AFRICA was  
45 implemented, and what the additional health economic and clinical data are, drawing case  
46 comparisons across clinics, and across countries, and developing possible explanations for  
47 implementation variation. This approach will help to identify factors which are plausibly and/or  
48 consistently related to successful or unsuccessful delivery of intervention components. Emerging  
49 theories and the relationship of the data to the conceptual literature underpinning the intervention will  
50 be discussed and refined at INTE-AFRICA research team meetings throughout the project. The  
51 analysis of the observational data will also require knowledge from health professional interviews to  
52 compare how reported experience relates to actual implementation of integration at the clinic level.  
53  
54  
55  
56  
57  
58  
59  
60



Beyond the EPP analysis of triangulated stakeholder narratives, the public understanding of science (PUS) theoretical framework<sup>62</sup> will guide overall qualitative data collection and analysis during INTE-AFRICA. It will unpack how patients and their communities in Uganda and Tanzania understand and use different knowledge on HIV and NCDs in their lives by understanding how they create meaning from scientific findings relating to NCDs and HIV and if, how, and to what degree they incorporate these findings into their everyday lives. This theoretical framework has the capacity to shift public attitudes by connecting and communicating development of innovative scientific concepts in the medical field (in this instance integration of HIV/NCD services in Tanzania and Uganda) to the non-scientific public, and thereby enhance education, training cascade, health policy and practice, and ultimately public understanding of multi-morbidities and sustainable routes to care. Further, it will create a platform for the sharing of lessons learnt, best practices and context adaptation of the final integrated model of care in other African countries (clinical care policies and practice, staff cascade of training, service user education and community awareness raising).

### **Conclusion**

This paper reports the design and methods for the planned process evaluation of the INTE-AFRICA cluster randomised, controlled trial in selected clinics in Tanzania and Uganda. It provides a unique opportunity to document implementation and collaboratively refine integrated care in two sub-Saharan African countries. The process evaluation protocol adheres to recommendations intended to facilitate the standardisation of process evaluation design and reporting<sup>51</sup>. This makes possible the synthesis of results of similar studies elsewhere in the SSA region in future.

### **Contributorship Statement**

All authors contributed to the conceptualisation of the research and contributed to writing the manuscript.

MCVH, MB, JVL, SJ designed the process evaluation protocol.

SJ, MN, SM, JB led the development of the INTE-AFRICA trial.

MCVH drafted the manuscript and all co-authors edited and commented on subsequent drafts. All authors approved the final draft for submission. All authors agree to be accountable for all aspects of the work in ensuring that questions related to the accuracy or integrity of any part of the work are appropriately investigated and resolved.

### **Funding Statement**

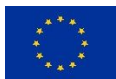

The INTE-AFRICA project has received funding from the European Union's Horizon 2020 research and innovation programme under grant agreement No 825698. JVL is supported by a

1  
2  
3 Spanish Ministry of Science, Innovation and Universities Miguel Servet grant (Instituto de Salud  
4 Carlos III/ESF, European Union [CP18/00074]) and further acknowledges support from the Spanish  
5 Ministry of Science, Innovation and Universities through the “Centro de Excelencia Severo Ochoa  
6 2019-2023” Programme (CEX2018-000806-S), and from the Government of Catalonia through the  
7 CERCA Programme.  
8  
9  
10

### 11 12 13 14 **Ethical approval statement**

15 Ethical approval for the evaluation has been granted in 2019 at the Liverpool School of Tropical  
16 Medicine (UK), the National Institute of Medical Research (Tanzania) and Medical Research Council  
17 (Uganda).  
18  
19

### 20 21 22 **Data sharing statement**

23 No additional data available.  
24

### 25 **Competing interests statement**

26 None  
27  
28

### 29 30 **Provenance and peer review**

31 Not commissioned; internally peer reviewed.  
32  
33

### 34 35 **Open access**

36 This is an open access article distributed in accordance with the Creative Commons Attribution 4.0  
37 Unported (CC BY 4.0) license, which permits others to copy, redistribute, remix, transform and build  
38 upon this work for any purpose, provided the original work is properly cited, a link to the licence is  
39 given, and indication of whether changes were made. See: <https://creativecommons.org/licenses/by/4.0/>.  
40  
41  
42  
43  
44  
45  
46  
47  
48  
49  
50  
51  
52  
53  
54  
55  
56  
57  
58  
59  
60

## References

1. Lim SS, Vos T, Flaxman AD, et al. A comparative risk assessment of burden of disease and injury attributable to 67 risk factors and risk factor clusters in 21 regions, 1990-2010: a systematic analysis for the Global Burden of Disease Study 2010. *Lancet* 2012;380(9859):2224-60.
2. World Health Organization. A global brief on hypertension : silent killer, global public health crisis. Geneva, Switzerland, 2013.
3. Global, regional, and national age-sex specific all-cause and cause-specific mortality for 240 causes of death, 1990-2013: a systematic analysis for the Global Burden of Disease Study 2013. *Lancet* 2015;385(9963):117-71.
4. World Health Organization. Global report on diabetes. Geneva: World Health Organization 2016.
5. Noncommunicable Diseases Progress Monitor, 2017. Geneva: World Health Organization 2017.
6. International Diabetes Foundation. Diabetes Atlas. 7th ed. Brussels: International Diabetes Federation 2015.
7. Xu Y, Chen X, Wang K. Global prevalence of hypertension among people living with HIV: a systematic review and meta-analysis. *J Am Soc Hypertens* 2017;11(8):530-40.
8. Adeloye D, Basquill C. Estimating the prevalence and awareness rates of hypertension in Africa: a systematic analysis. *PLoS One* 2014;9(8):e104300.
9. Atun R, Davies JI, Gale EAM, et al. Diabetes in sub-Saharan Africa: from clinical care to health policy. *Lancet Diabetes Endocrinol* 2017;5(8):622-67.
10. Remais JV, Zeng G, Li G, et al. Convergence of non-communicable and infectious diseases in low- and middle-income countries. *Int J Epidemiol* 2013;42(1):221-7.
11. Ford N, Ball A, Baggaley R, et al. The WHO public health approach to HIV treatment and care: looking back and looking ahead. *Lancet Infect Dis* 2018;18(3):e76-e86.
12. Global, regional, and national comparative risk assessment of 79 behavioural, environmental and occupational, and metabolic risks or clusters of risks, 1990-2015: a systematic analysis for the Global Burden of Disease Study 2015. *Lancet* 2016;388(10053):1659-724.
13. Guwatudde D, Nankya-Mutyoba J, Kalyesubula R, et al. The burden of hypertension in sub-Saharan Africa: a four-country cross sectional study. *BMC Public Health* 2015;15:1211.
14. Sicree R, Shaw J, Zimmet P. Diabetes Atlas International Diabetes Federation: Belgium: International Diabetes Federation, 2006.
15. Addo J, Smeeth L, Leon DA. Hypertension in sub-saharan Africa: a systematic review. *Hypertension* 2007;50(6):1012-8.
16. Chang AY, Gómez-Olivé FX, Manne-Goehler J, et al. Multimorbidity and care for hypertension, diabetes and HIV among older adults in rural South Africa. *Bull World Health Organ* 2019;97(1):10-23.
17. George S, McGrath N, Oni T. The association between a detectable HIV viral load and non-communicable diseases comorbidity in HIV positive adults on antiretroviral therapy in Western Cape, South Africa. *BMC Infect Dis* 2019;19(1):348.
18. Jaffar S, Gill G. The crisis of diabetes in sub-Saharan Africa. *Lancet Diabetes Endocrinol* 2017;5(8):574-75.
19. Jaffar S. Diabetes and other non-communicable diseases in Africa: a potential disaster in the waiting. *Lancet Diabetes Endocrinol* 2016;4(11):875-77.

- 1
  - 2
  - 3
  - 4
  - 5
  - 6
  - 7
  - 8
  - 9
  - 10
  - 11
  - 12
  - 13
  - 14
  - 15
  - 16
  - 17
  - 18
  - 19
  - 20
  - 21
  - 22
  - 23
  - 24
  - 25
  - 26
  - 27
  - 28
  - 29
  - 30
  - 31
  - 32
  - 33
  - 34
  - 35
  - 36
  - 37
  - 38
  - 39
  - 40
  - 41
  - 42
  - 43
  - 44
  - 45
  - 46
  - 47
  - 48
  - 49
  - 50
  - 51
  - 52
  - 53
  - 54
  - 55
  - 56
  - 57
  - 58
  - 59
  - 60
20. Lupafya PC, Mwagomba BL, Hosig K, et al. Implementation of Policies and Strategies for Control of Noncommunicable Diseases in Malawi: Challenges and Opportunities. *Health Educ Behav* 2016;43(1 Suppl):64s-9s.
21. Katende D, Mutungi G, Baisley K, et al. Readiness of Ugandan health services for the management of outpatients with chronic diseases. *Trop Med Int Health* 2015;20(10):1385-95.
22. Manne-Goehler J, Atun R, Stokes A, et al. Diabetes diagnosis and care in sub-Saharan Africa: pooled analysis of individual data from 12 countries. *Lancet Diabetes Endocrinol* 2016;4(11):903-12.
23. Peck R, Mghamba J, Vanobberghen F, et al. Preparedness of Tanzanian health facilities for outpatient primary care of hypertension and diabetes: a cross-sectional survey. *Lancet Glob Health* 2014;2(5):e285-92.
24. Price AJ, Crampin AC, Amberbir A, et al. Prevalence of obesity, hypertension, and diabetes, and cascade of care in sub-Saharan Africa: a cross-sectional, population-based study in rural and urban Malawi. *Lancet Diabetes Endocrinol* 2018;6(3):208-22.
25. Patel P, Rose CE, Collins PY, et al. Noncommunicable diseases among HIV-infected persons in low-income and middle-income countries: a systematic review and meta-analysis. *Aids* 2018;32 Suppl 1(Suppl 1):S5-s20.
26. Haregu TN, Setswe G, Elliott J, et al. Integration of HIV/AIDS and noncommunicable diseases in developing countries: rationale, policies and models. *International Journal of Healthcare* 2015;1:21-27.
27. Husain NE, Noor SK, Elmadhoun WM, et al. Diabetes, metabolic syndrome and dyslipidemia in people living with HIV in Africa: re-emerging challenges not to be forgotten. *HIV AIDS (Auckl)* 2017;9:193-202.
28. Juma K, Reid M, Roy M, et al. From HIV prevention to non-communicable disease health promotion efforts in sub-Saharan Africa: A Narrative Review. *Aids* 2018;32 Suppl 1:S63-s73.
29. Rabkin M, Melaku Z, Bruce K, et al. Strengthening Health Systems for Chronic Care: Leveraging HIV Programs to Support Diabetes Services in Ethiopia and Swaziland. *J Trop Med* 2012;2012:137460.
30. Some D, Edwards JK, Reid T, et al. Task Shifting the Management of Non-Communicable Diseases to Nurses in Kibera, Kenya: Does It Work? *PLoS One* 2016;11(1):e0145634.
31. Haldane V, Legido-Quigley H, Chuah FLH, et al. Integrating cardiovascular diseases, hypertension, and diabetes with HIV services: a systematic review. *AIDS Care* 2018;30(1):103-15.
32. Craig P, Dieppe P, Macintyre S, et al. Developing and evaluating complex interventions: the new Medical Research Council guidance. *Bmj* 2008;337:a1655.
33. Iwelunmor J, Ezechi O, Obiezu-Umeh C, et al. Capabilities, opportunities and motivations for integrating evidence-based strategy for hypertension control into HIV clinics in Southwest Nigeria. *PLoS One* 2019;14(6):e0217703.
34. Rachlis B, Naanyu V, Wachira J, et al. Identifying common barriers and facilitators to linkage and retention in chronic disease care in western Kenya. *BMC Public Health* 2016;16:741.
35. Ameh S, Klipstein-Grobusch K, Musenge E, et al. Effectiveness of an Integrated Approach to HIV and Hypertension Care in Rural South Africa: Controlled Interrupted Time-Series Analysis. *J Acquir Immune Defic Syndr* 2017;75(4):472-79.
36. Anand TN, Joseph LM, Geetha AV, et al. Task sharing with non-physician health-care workers for management of blood pressure in low-income and middle-income

- 1  
2  
3 countries: a systematic review and meta-analysis. *Lancet Glob Health*  
4 2019;7(6):e761-e71.  
5  
6 37. Divala OH, Amberbir A, Ismail Z, et al. The burden of hypertension, diabetes mellitus,  
7 and cardiovascular risk factors among adult Malawians in HIV care: consequences for  
8 integrated services. *BMC Public Health* 2016;16(1):1243.  
9  
10 38. Edwards JK, Bygrave H, Van den Bergh R, et al. HIV with non-communicable diseases  
11 in primary care in Kibera, Nairobi, Kenya: characteristics and outcomes 2010-2013.  
12 *Trans R Soc Trop Med Hyg* 2015;109(7):440-6.  
13  
14 39. Golovaty I, Sharma M, Van Heerden A, et al. Cost of Integrating Noncommunicable  
15 Disease Screening Into Home-Based HIV Testing and Counseling in South Africa. *J*  
16 *Acquir Immune Defic Syndr* 2018;78(5):522-26.  
17  
18 40. Kwarisiima D, Atukunda M, Owaraganise A, et al. Hypertension control in integrated  
19 HIV and chronic disease clinics in Uganda in the SEARCH study. *BMC Public*  
20 *Health* 2019;19(1):511.  
21  
22 41. Fairall LR, Folb N, Timmerman V, et al. Educational Outreach with an Integrated  
23 Clinical Tool for Nurse-Led Non-communicable Chronic Disease Management in  
24 Primary Care in South Africa: A Pragmatic Cluster Randomised Controlled Trial.  
25 *PLoS Med* 2016;13(11):e1002178.  
26  
27 42. Mahomed OH, Asmall S. Development and implementation of an integrated chronic  
28 disease model in South Africa: lessons in the management of change through  
29 improving the quality of clinical practice. *Int J Integr Care* 2015;15:e038.  
30  
31 43. Matanje Mwangomba BL, Ameh S, Bongomin P, et al. Opportunities and challenges for  
32 evidence-informed HIV-noncommunicable disease integrated care policies and  
33 programs: lessons from Malawi, South Africa, Swaziland and Kenya. *Aids* 2018;32  
34 Suppl 1:S21-s32.  
35  
36 44. Nuche-Berenguer B, Kupfer LE. Readiness of Sub-Saharan Africa Healthcare Systems  
37 for the New Pandemic, Diabetes: A Systematic Review. *J Diabetes Res*  
38 2018;2018:9262395.  
39  
40 45. Pfaff C, Scott V, Hoffman R, et al. You can treat my HIV - But can you treat my blood  
41 pressure? Availability of integrated HIV and non-communicable disease care in  
42 northern Malawi. *Afr J Prim Health Care Fam Med* 2017;9(1):e1-e8.  
43  
44 46. Pfaff C, Singano V, Akello H, et al. Early experiences integrating hypertension and  
45 diabetes screening and treatment in a human immunodeficiency virus clinic in  
46 Malawi. *Int Health* 2018;10(6):495-501.  
47  
48 47. Rawat A, Uebel K, Moore D, et al. Integrated HIV-Care Into Primary Health Care Clinics  
49 and the Influence on Diabetes and Hypertension Care: An Interrupted Time Series  
50 Analysis in Free State, South Africa Over 4 Years. *J Acquir Immune Defic Syndr*  
51 2018;77(5):476-83.  
52  
53 48. Jaffar S, Amuron B, Foster S, et al. Rates of virological failure in patients treated in a  
54 home-based versus a facility-based HIV-care model in Jinja, southeast Uganda: a  
55 cluster-randomised equivalence trial. *Lancet* 2009;374(9707):2080-89.  
56  
57 49. Manne-Goehler J, Atun R, Stokes A, et al. Diabetes diagnosis and care in sub-Saharan  
58 Africa: pooled analysis of individual data from 12 countries. *Lancet Diabetes*  
59 *Endocrinol* 2016;4(11):903-12. doi: 10.1016/S2213-8587(16)30181-4 [published  
60 Online First: 2016/10/30]  
50. Georgeu D, Colvin CJ, Lewin S, et al. Implementing nurse-initiated and managed  
antiretroviral treatment (NIMART) in South Africa: a qualitative process evaluation  
of the STRETCH trial. *Implement Sci* 2012;7:66.



- 1
- 2
- 3
- 4 51. Moore G, Audrey S, Barker M, et al. Process evaluation in complex public health
- 5 intervention studies: the need for guidance. *J Epidemiol Community Health*
- 6 2014;68(2):101-2.
- 7
- 8 52. Linnan L, Steckler A. Process evaluation for public health interventions and research. An
- 9 overview. In: Steckler A, Linnan L, eds. *Process evaluation for public health*
- 10 *interventions and research*. 1st ed. San Francisco: Josset-Bass 2002:1-23.
- 11
- 12 53. Murdoch J, Curran R, Bachmann M, et al. Strengthening the quality of paediatric primary
- 13 care: protocol for the process evaluation of a health systems intervention in South
- 14 Africa. *BMJ Glob Health* 2018;3(Suppl 5):e000945.
- 15
- 16 54. Kippax S. Effective HIV prevention: the indispensable role of social science. *J Int AIDS*
- 17 *Soc* 2012;15(2):17357.
- 18
- 19 55. Bronfenbrenner U. Toward an experimental ecology of human development. *American*
- 20 *Psychologist* 1977;32(7):513-31.
- 21
- 22 56. Bronfenbrenner U. *The ecology of human development: Experiments by nature and*
- 23 *design*. Cambridge, MA: Harvard University Press 1979.
- 24
- 25 57. Hawe P, Shiell A, Riley T. Theorising interventions as events in systems. *Am J*
- 26 *Community Psychol* 2009;43(3-4):267-76.
- 27
- 28 58. Grimshaw JM, Zwarenstein M, Tetroe JM, et al. Looking inside the black box: a theory-
- 29 based process evaluation alongside a randomised controlled trial of printed
- 30 educational materials (the Ontario printed educational message, OPEM) to improve
- 31 referral and prescribing practices in primary care in Ontario, Canada. *Implement Sci*
- 32 2007;2:38.
- 33
- 34 59. Karlsson G. *Psychological Qualitative Research From a Phenomenological Perspective:*
- 35 *Almqvist & Wiksell International* 1993.
- 36
- 37 60. Marshall C, Rossman GB. *Designing qualitative research*. 4th ed. Thousands Oaks, Calif:
- 38 *Sage Publications* 2006.
- 39
- 40 61. Patton MQ, Patton MQ. *Qualitative research and evaluation methods*. Thousand Oaks,
- 41 Calif.: *Sage Publications* 2002.
- 42
- 43 62. Brossard, D and Lewenstein, B (2010). *A Critical Appraisal of Models of Public*
- 44 *Understanding of Science: Using Practice to inform Theory*. Routledge.
- 45
- 46
- 47
- 48
- 49
- 50
- 51
- 52
- 53
- 54
- 55
- 56
- 57
- 58
- 59
- 60

**Table One 'Key data on the country settings'**

|                                                                    | <b>Tanzania</b> | <b>Uganda</b> |
|--------------------------------------------------------------------|-----------------|---------------|
| Income level                                                       | Low             | Low           |
| Population size                                                    | 58m<br>(2018)   | 35m<br>(2016) |
| Estimated prevalence of hypertension from STEPS survey             | 26%             | 26%           |
| Estimated prevalence of diabetes from STEPS survey <sup>49</sup> * | 5-10%           | 2-5%          |
| Estimated prevalence of HIV-infection                              | 5.1% (2017)     | 6.2% (2017)   |
| Doctors density /100,000 population                                | 3 (2014)        | 0.8 (2005)    |

\* diabetes estimate varies according to age and gender. Data are of variable quality but reference 11 shows that the overall median diabetes prevalence in 12 countries in Africa is 5%.

**Table Two ‘Logic Model of programme inputs, processes and outcomes’**

| <b>Intervention inputs</b>                                                                                                               | <b>Changes in care processes</b>                                                                                                                             | <b>Outcomes</b>                                                                                                                                                                                                                                                                                              |
|------------------------------------------------------------------------------------------------------------------------------------------|--------------------------------------------------------------------------------------------------------------------------------------------------------------|--------------------------------------------------------------------------------------------------------------------------------------------------------------------------------------------------------------------------------------------------------------------------------------------------------------|
| Negotiation with national, district and local government health departments, NGOs and funders                                            | Agreement about and support for service model, including reorganisation of clinics and staff<br>Commitment to ensure drug supply                             | <ul style="list-style-type: none"> <li>• Reorganisation of clinics and staff to implement the model</li> <li>• An effective, quality, and sustainable funded drug supply chain</li> </ul>                                                                                                                    |
| Negotiating lower drug prices<br>Supporting and monitoring drug ordering in each clinic<br>Providing buffer drug supplies to each clinic | Drugs always in stock                                                                                                                                        | <ul style="list-style-type: none"> <li>• Increased diagnosis of comorbid conditions</li> <li>• Increased retention and adherence</li> <li>• Increased viral suppression, better control of blood pressure and blood glucose</li> </ul>                                                                       |
| Engagement with and support for clinicians and managers in each clinic                                                                   | Clinicians and managers enable and support integration, and find solutions to emerging problems                                                              | <ul style="list-style-type: none"> <li>• Less AIDS, cardiovascular disease and diabetes complications</li> <li>• Lower patients costs (travel and absence from work)</li> </ul>                                                                                                                              |
| Provision of integrated service in each clinic (alongside and additional to existing services)                                           | Trial participants attend integrated service<br>Avoid multiple visits for patients with multi-morbidity                                                      | <ul style="list-style-type: none"> <li>• Less health service duplication and costs (health service costs might increase if more patients are diagnosed and are more adherent)</li> <li>• Increase patient satisfaction</li> <li>• Increased clinician satisfaction; less burn-out and absenteeism</li> </ul> |
| Training clinicians about integrated clinical management                                                                                 | Better diagnosis and treatment including attention to comorbid conditions                                                                                    | <ul style="list-style-type: none"> <li>• Reduce missed opportunities for improving care and health outcomes</li> </ul>                                                                                                                                                                                       |
| Community engagement                                                                                                                     | Identify and enlist community organisations and resources to help with health education, tracing defaulters or patients who have difficulty attending clinic |                                                                                                                                                                                                                                                                                                              |
| Providing standardised stationery for integrated medical records; training clinicians to use it                                          | Increased awareness by clinicians and patients about disease severity, comorbidity, adherence and control in individual patients                             |                                                                                                                                                                                                                                                                                                              |
| Improving monitoring and evaluation based on clinics registers and medical records                                                       | Regular data analysis and feedback to staff                                                                                                                  | Quality assurance and continuous improvement in the quality of care                                                                                                                                                                                                                                          |
| Identifying effective health education                                                                                                   | Improve health education at clinics                                                                                                                          | Healthier lifestyles<br>Increased adherence                                                                                                                                                                                                                                                                  |



Table Three: 'Process Evaluation Design and data collection framework'

| Post Integration<br>* Numbers indicated are per country/.<br>Data Collection at each Site                                                                                                  | 6 months | 12 months | 18 months | Contextual level                                                                        |
|--------------------------------------------------------------------------------------------------------------------------------------------------------------------------------------------|----------|-----------|-----------|-----------------------------------------------------------------------------------------|
| <i>Observations</i> of consultations, different processes and clinic flow at clinic levels and in non-clinical areas.                                                                      | 1 week   | 1 week    | 1 week    | Micro context (facility and neighbourhoods)                                             |
| <i>In depth phenomenological interviews</i> with service users                                                                                                                             | 25       | 25        | 25        | Micro context (facility and neighbourhoods)                                             |
| <i>In depth phenomenological interviews</i> with health care providers at the clinic (health facility managers, and health professionals such as physicians, nurses, public health nurses) | 10       | 10        | 10        | Meso context (national to regional/city)<br>Micro context (facility and neighbourhoods) |
| Semi-structured interviews with Ministerial policy makers and provincial/regional/district level clinical/health senior management (Director for NCD, HIV and curative services).          | -        | 5         | 5         | Macro context (Global)<br>Meso context (national to regional/city)                      |
| <i>Semi-structured interviews</i> with NGO and international organisations (for example WHO Country office, UNAIDS, PEPFAR, CDC)                                                           | -        | 5         | 5         | Macro context (Global)<br>Meso context (national to regional/city)                      |
| <i>Focus group discussions</i> (FGD) with community leaders (8-12 participants)                                                                                                            | 1        | 1         | 1         | Micro context (facility and neighbourhoods)                                             |
| <i>Focus group discussions</i> (FGD) gender specific with community members(8-12participants)                                                                                              | 2        | 2         | 2         | Micro context (facility and neighbourhoods)                                             |
| <i>In depth phenomenological interviews</i> with clinical researchers                                                                                                                      |          |           | 4         | Micro context (facility and neighbourhoods)<br>Meso context (national to regional/city) |

Figure One 'Potential benefits of integrating diabetes, hypertension and HIV services for a) DM and hypertension control, and b) HIV control'

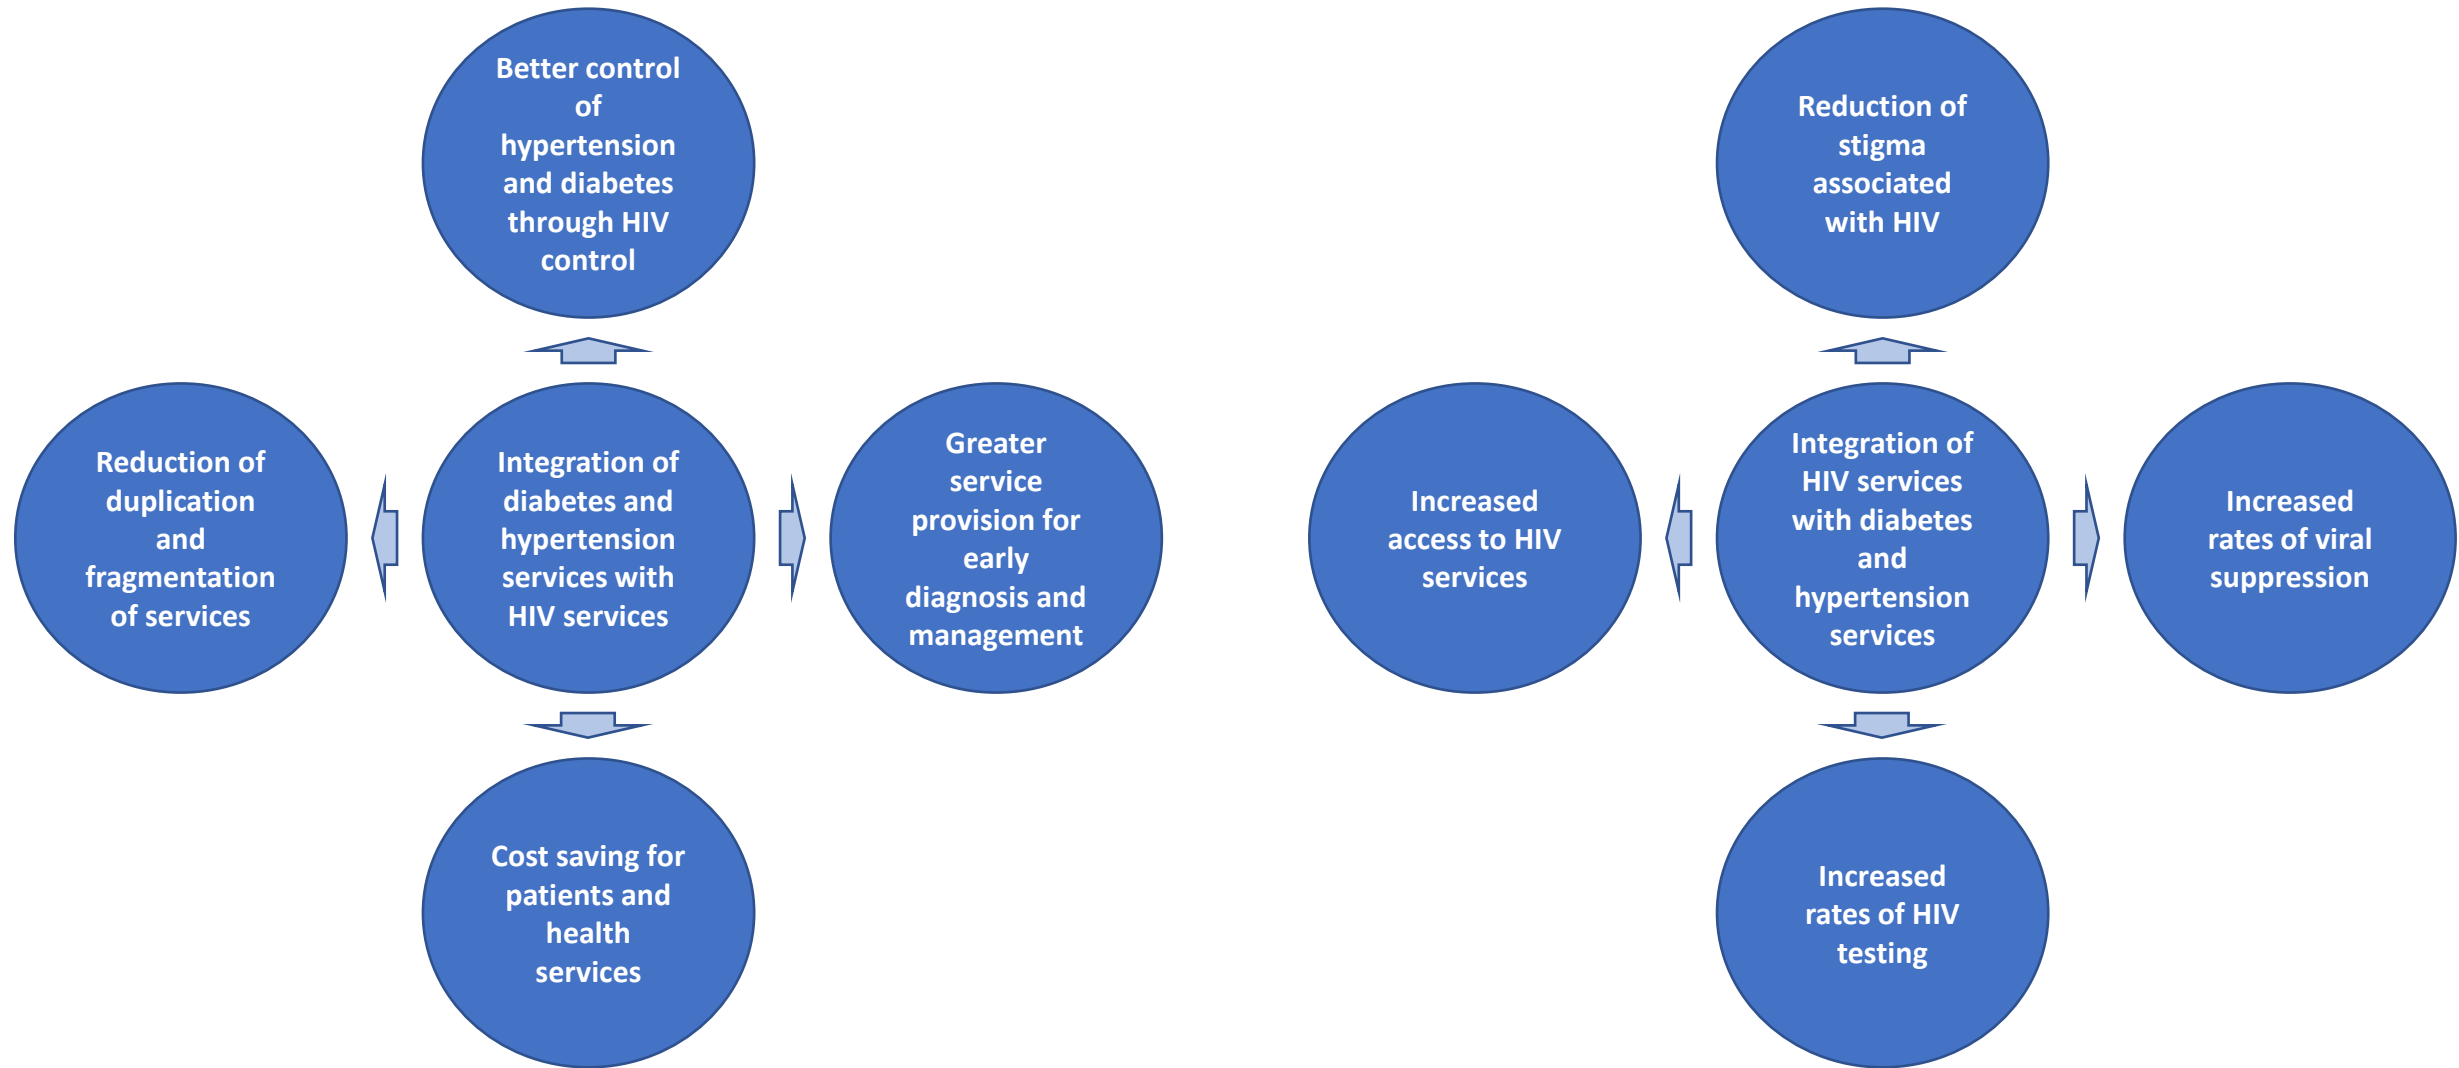

**a) Benefits for hypertension and diabetes control**

**b) Benefits for HIV-control**

Figure Two 'INTEAFRICA Conceptual Model'

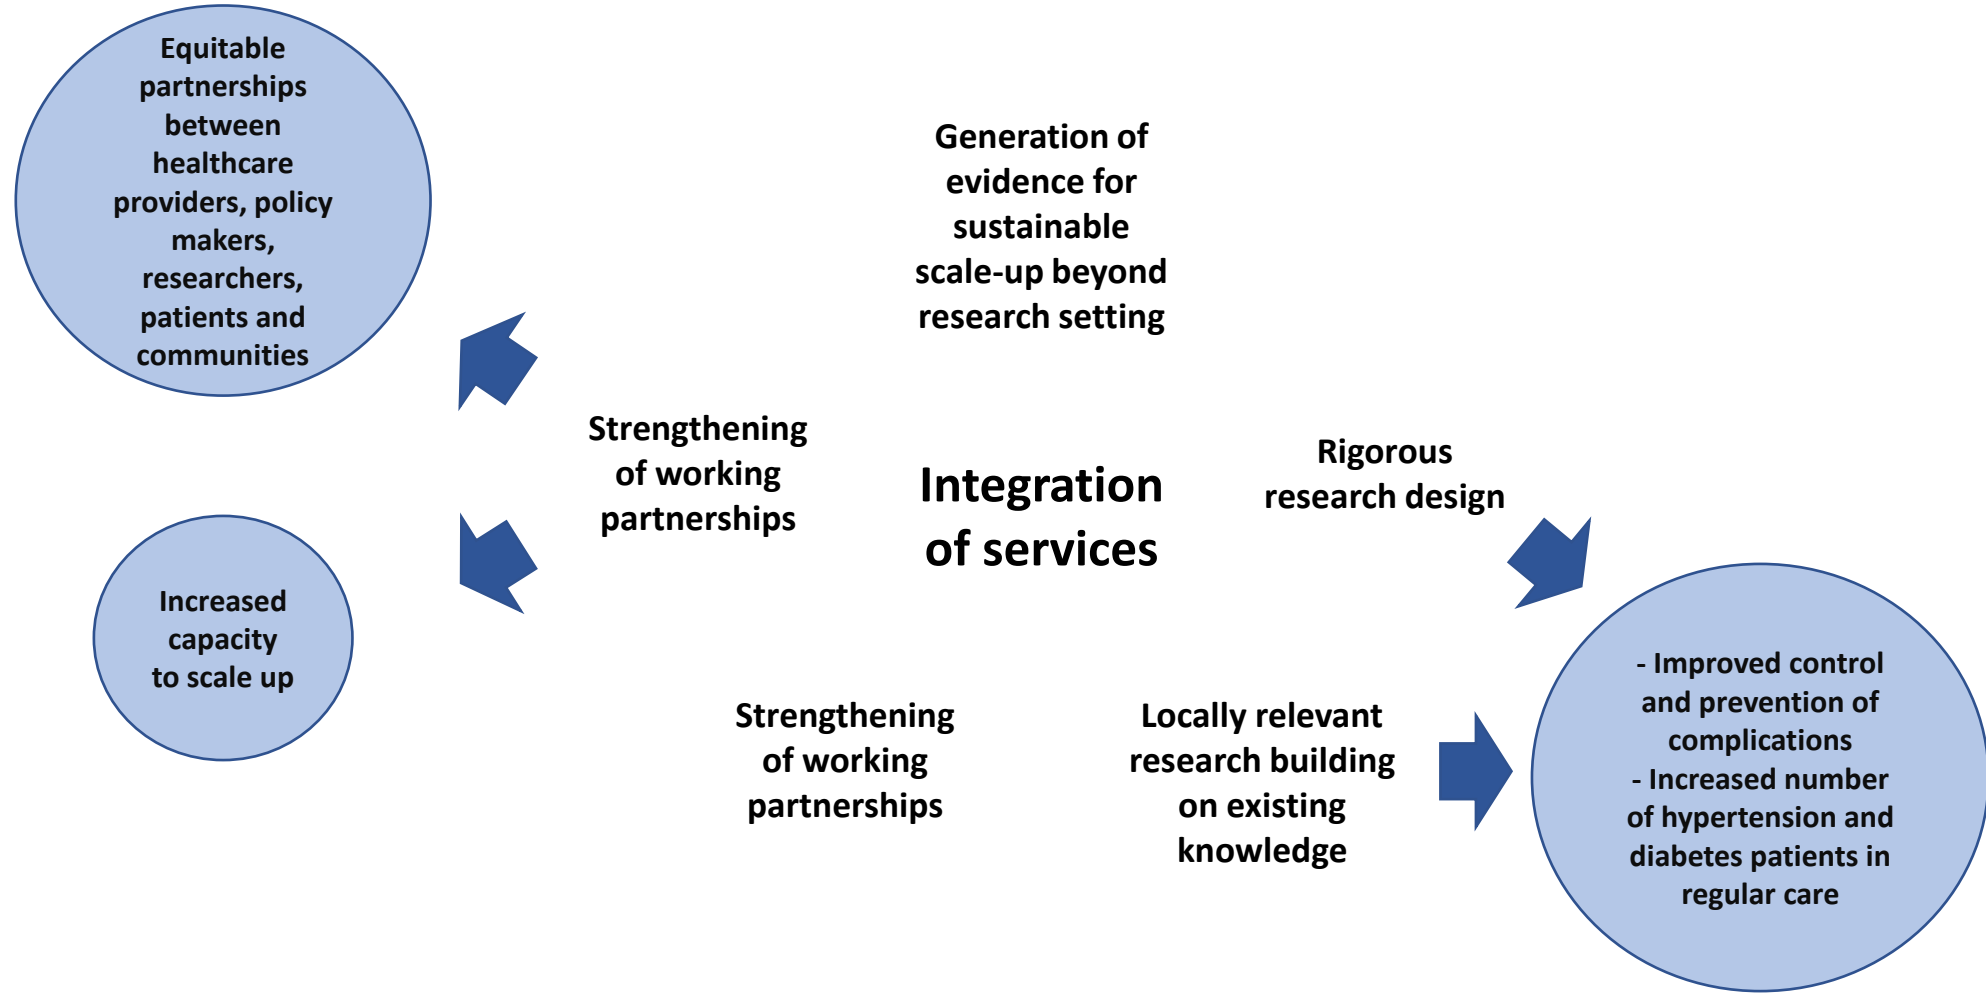

1  
2  
3  
4  
5  
6  
7  
8  
9  
10  
11  
12  
13  
14  
15  
16  
17  
18  
19  
20  
21  
22  
23  
24  
25  
26  
27  
28  
29  
30  
31  
32  
33  
34  
35  
36  
37  
38  
39  
40  
41

Figure Three 'Potential contextual influences on INTEAFRICA programme implementation cascade'

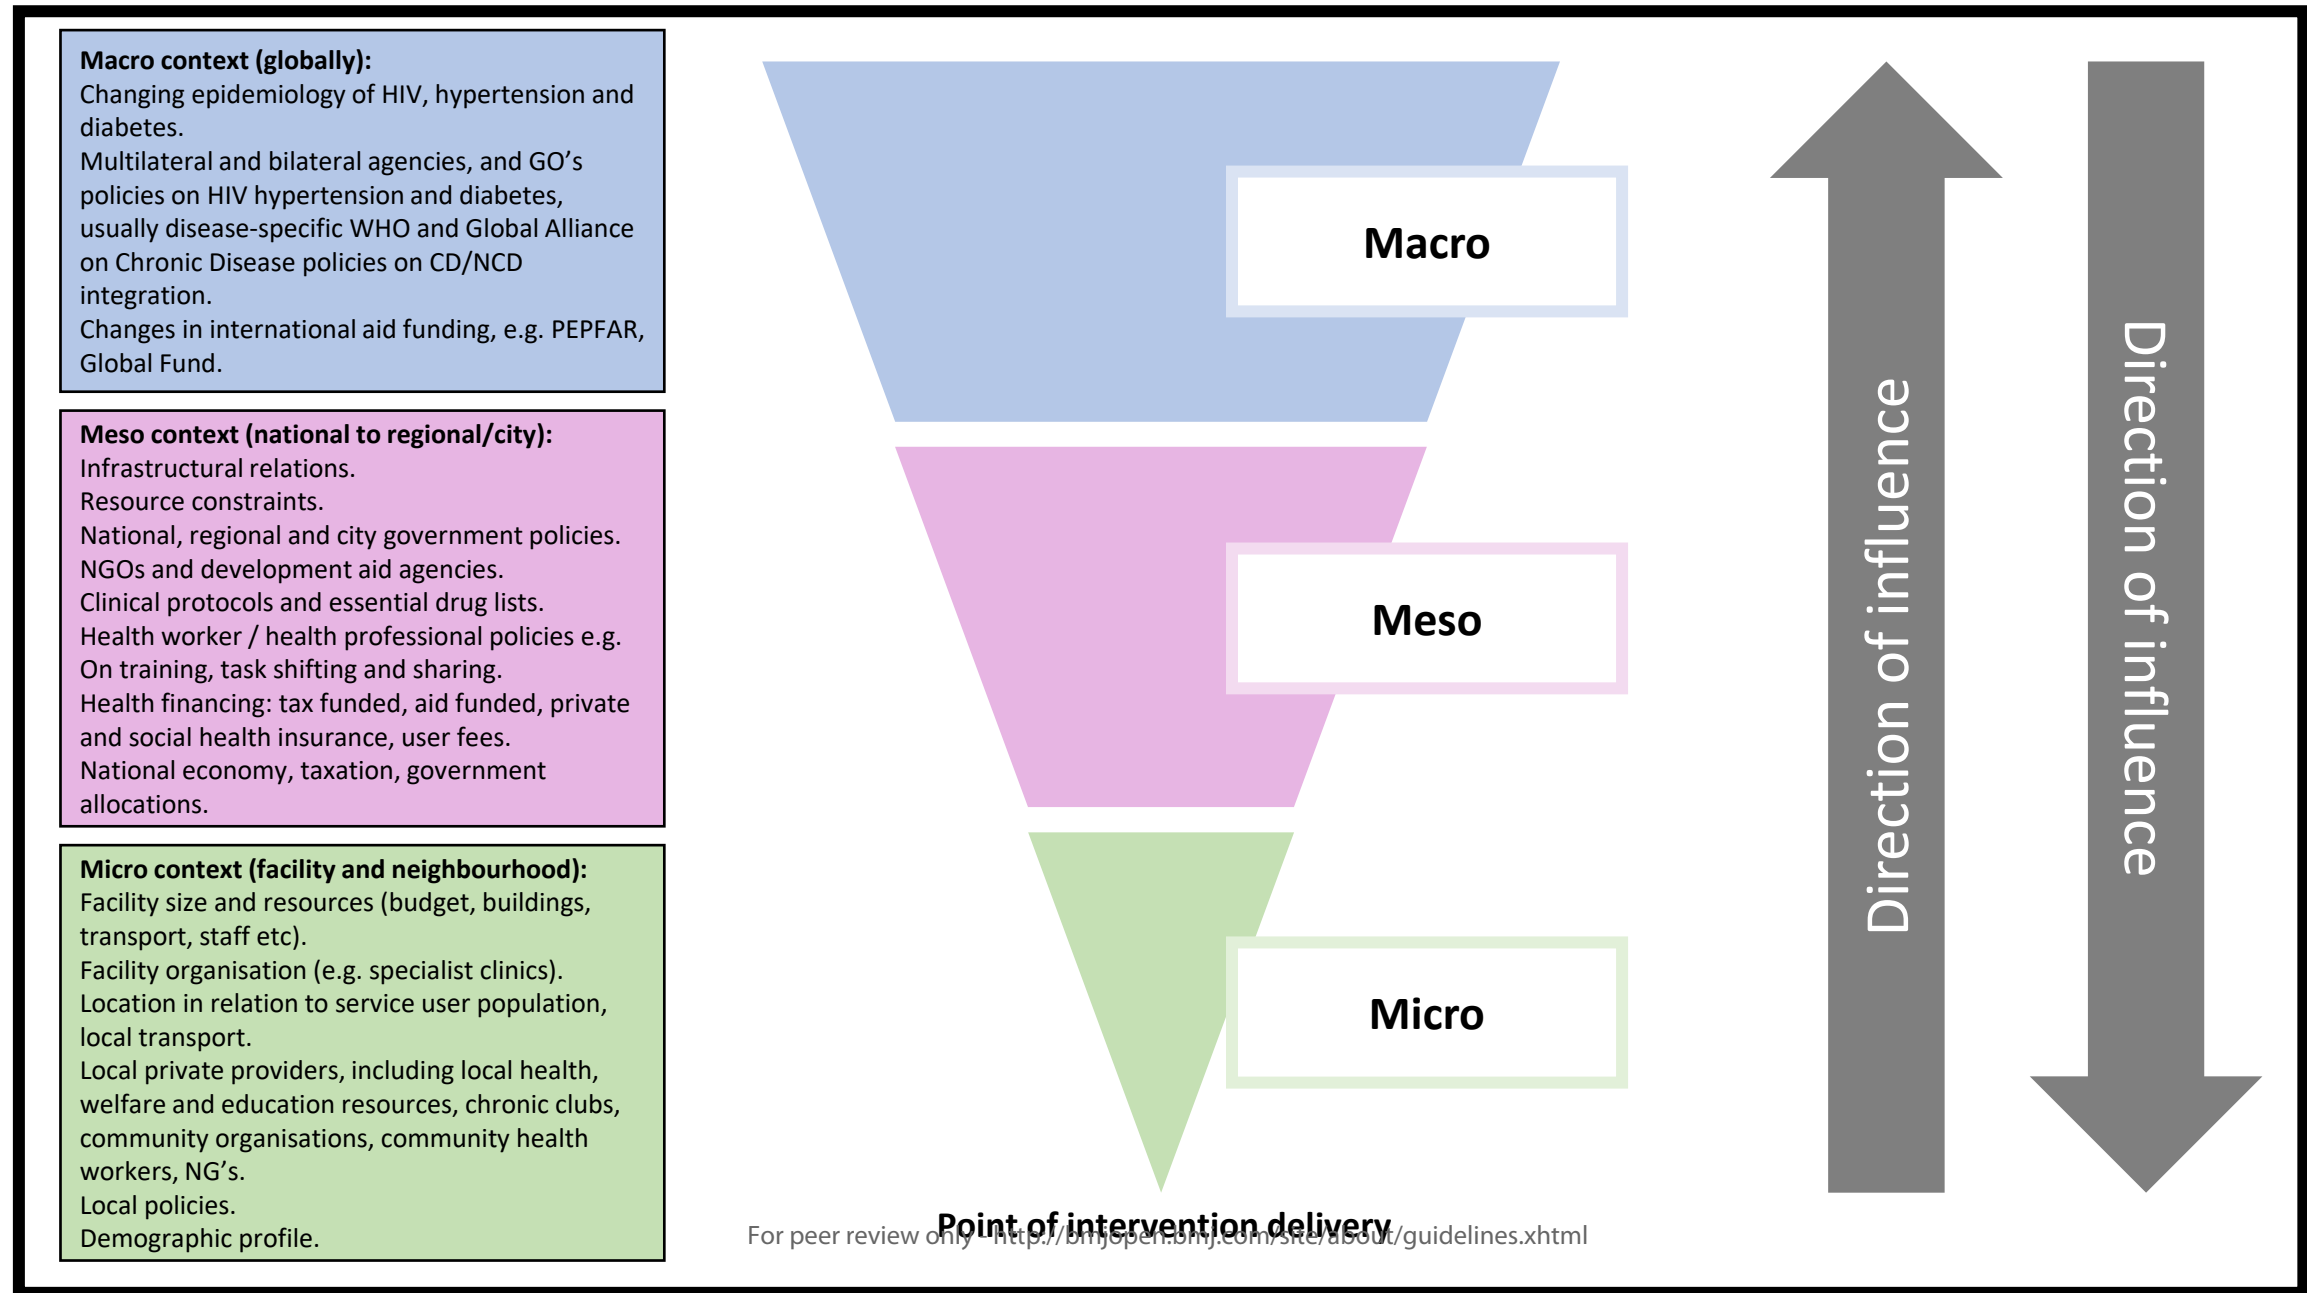

1  
2  
3  
4  
5  
6  
7  
8  
9  
10  
11  
12  
13  
14  
15  
16  
17  
18  
19  
20  
21  
22  
23  
24  
25  
26  
27  
28  
29  
30  
31  
32  
33  
34  
35  
36  
37  
38  
39  
40  
41

# BMJ Open

## Strengthening integration of chronic care in Africa: protocol for the qualitative process evaluation of integrated HIV, diabetes and hypertension care in a cluster randomised controlled trial in Uganda and Tanzania.

|                                 |                                                                                                                                                                                                                                                                                                                                                                                                                                                                                                                                                                                                                                                                                                                                                                                                                                                                                                                                                                                                                                                                                                           |
|---------------------------------|-----------------------------------------------------------------------------------------------------------------------------------------------------------------------------------------------------------------------------------------------------------------------------------------------------------------------------------------------------------------------------------------------------------------------------------------------------------------------------------------------------------------------------------------------------------------------------------------------------------------------------------------------------------------------------------------------------------------------------------------------------------------------------------------------------------------------------------------------------------------------------------------------------------------------------------------------------------------------------------------------------------------------------------------------------------------------------------------------------------|
| Journal:                        | <i>BMJ Open</i>                                                                                                                                                                                                                                                                                                                                                                                                                                                                                                                                                                                                                                                                                                                                                                                                                                                                                                                                                                                                                                                                                           |
| Manuscript ID                   | bmjopen-2020-039237.R1                                                                                                                                                                                                                                                                                                                                                                                                                                                                                                                                                                                                                                                                                                                                                                                                                                                                                                                                                                                                                                                                                    |
| Article Type:                   | Protocol                                                                                                                                                                                                                                                                                                                                                                                                                                                                                                                                                                                                                                                                                                                                                                                                                                                                                                                                                                                                                                                                                                  |
| Date Submitted by the Author:   | 22-Jul-2020                                                                                                                                                                                                                                                                                                                                                                                                                                                                                                                                                                                                                                                                                                                                                                                                                                                                                                                                                                                                                                                                                               |
| Complete List of Authors:       | <p>Van Hout, Marie-Claire; Liverpool John Moores University, Public Health Institute</p> <p>Bachmann, Max; University of East Anglia Faculty of Medicine and Health Sciences, Norwich Medical School</p> <p>Lazarus, Jeffrey; Instituto de Salud Global Barcelona, Hospital Clínic, University of Barcelona;</p> <p>Shayo, Elizabeth; National Institute for Medical Research, Muhimbili Centre</p> <p>Bukenya, Dominic; Medical Research Council Uganda, MRC/UVRI/LSHTM Uganda Research Unit</p> <p>Picchio, Camila; Instituto de Salud Global Barcelona, Hospital Clinic University of Barcelona</p> <p>Nyirenda, Moffat; Medical Research Council Uganda , MRC/UVRI/LSHTM Uganda Research Unit</p> <p>Mfinanga, Sayoki; National Institute for Medical Research, Muhimbili Centre</p> <p>Birungi, Josephine; Medical Research Council Uganda , MRC/UVRI/LSHTM Uganda Research Unit</p> <p>Okebe, Joseph; Liverpool School of Tropical Medicine, Department of International Public Health</p> <p>Jaffar, Shabbar; Liverpool School of Tropical Medicine, Department of International Public Health</p> |
| <b>Primary Subject Heading</b>: | HIV/AIDS                                                                                                                                                                                                                                                                                                                                                                                                                                                                                                                                                                                                                                                                                                                                                                                                                                                                                                                                                                                                                                                                                                  |
| Secondary Subject Heading:      | Global health, Health services research, Patient-centred medicine, Diabetes and endocrinology                                                                                                                                                                                                                                                                                                                                                                                                                                                                                                                                                                                                                                                                                                                                                                                                                                                                                                                                                                                                             |
| Keywords:                       | Hypertension < CARDIOLOGY, DIABETES & ENDOCRINOLOGY, International health services < HEALTH SERVICES ADMINISTRATION & MANAGEMENT, Organisation of health services < HEALTH SERVICES ADMINISTRATION & MANAGEMENT                                                                                                                                                                                                                                                                                                                                                                                                                                                                                                                                                                                                                                                                                                                                                                                                                                                                                           |
|                                 |                                                                                                                                                                                                                                                                                                                                                                                                                                                                                                                                                                                                                                                                                                                                                                                                                                                                                                                                                                                                                                                                                                           |

1  
2  
3  
4  
5  
6  
7  
8  
9  
10  
11  
12  
13  
14  
15  
16  
17  
18  
19  
20  
21  
22  
23  
24  
25  
26  
27  
28  
29  
30  
31  
32  
33  
34  
35  
36  
37  
38  
39  
40  
41  
42  
43  
44  
45  
46  
47  
48  
49  
50  
51  
52  
53  
54  
55  
56  
57  
58  
59  
60

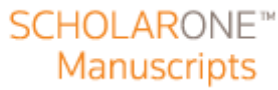

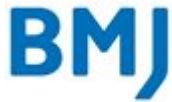

I, the Submitting Author has the right to grant and does grant on behalf of all authors of the Work (as defined in the below author licence), an exclusive licence and/or a non-exclusive licence for contributions from authors who are: i) UK Crown employees; ii) where BMJ has agreed a CC-BY licence shall apply, and/or iii) in accordance with the terms applicable for US Federal Government officers or employees acting as part of their official duties; on a worldwide, perpetual, irrevocable, royalty-free basis to BMJ Publishing Group Ltd ("BMJ") its licensees and where the relevant Journal is co-owned by BMJ to the co-owners of the Journal, to publish the Work in this journal and any other BMJ products and to exploit all rights, as set out in our [licence](#).

The Submitting Author accepts and understands that any supply made under these terms is made by BMJ to the Submitting Author unless you are acting as an employee on behalf of your employer or a postgraduate student of an affiliated institution which is paying any applicable article publishing charge ("APC") for Open Access articles. Where the Submitting Author wishes to make the Work available on an Open Access basis (and intends to pay the relevant APC), the terms of reuse of such Open Access shall be governed by a Creative Commons licence – details of these licences and which [Creative Commons](#) licence will apply to this Work are set out in our licence referred to above.

Other than as permitted in any relevant BMJ Author's Self Archiving Policies, I confirm this Work has not been accepted for publication elsewhere, is not being considered for publication elsewhere and does not duplicate material already published. I confirm all authors consent to publication of this Work and authorise the granting of this licence.

**Title**

Strengthening integration of chronic care in Africa: protocol for the qualitative process evaluation of integrated HIV, diabetes and hypertension care in a cluster randomised controlled trial in Uganda and Tanzania

**Author Listing**

Marie Claire Van Hout, Liverpool John Moores University, Public Health Institute, United Kingdom

Max Bachmann, University of East Anglia, Faculty of Medicine and Health Sciences, United Kingdom

Jeffrey V Lazarus, Instituto de Salud Global Barcelona (Barcelona Institute for Global Health ISGlobal), Hospital Clínic, University of Barcelona, Spain

Elizabeth H. Shayo, National Institute for Medical Research (NIMR), Muhimbili Centre, Tanzania

Dominic Bukenya, Medical Research Council, MRC/UVRI/LSHTM Uganda Research Unit, Uganda

Camila A Picchio, Instituto de Salud Global Barcelona (Barcelona Institute for Global Health ISGlobal), Hospital Clínic, University of Barcelona, Spain

Moffat Nyirenda, Medical Research Council, MRC/UVRI/LSHTM Uganda Research Unit, Uganda

Sayoki Mfinanga, National Institute for Medical Research (NIMR), Muhimbili Centre, Tanzania

Josephine Birungi, Medical Research Council, MRC/UVRI/LSHTM Uganda Research Unit, Uganda

Joseph Okebe, Liverpool School of Tropical Medicine, Department of International Public Health, United Kingdom

Shabbar Jaffar, Liverpool School of Tropical Medicine, Department of International Public Health, United Kingdom

**Corresponding Author:**

Professor Marie Claire Van Hout, Public Health Institute, Exchange Station, Liverpool John Moores University, Liverpool L32ET, United Kingdom. Email: [m.c.vanhout@ljmu.ac.uk](mailto:m.c.vanhout@ljmu.ac.uk)

**Article Type:** Protocol



## Abstract

**Introduction** In sub-Saharan Africa (SSA), the burden of non-communicable diseases (NCDs), particularly diabetes mellitus (DM) and hypertension, has increased rapidly in recent years, although HIV infections remain a leading cause of death among young-middle aged adults. Health service coverage for NCDs remains very low in contrast to HIV, despite the increasing prevalence of co-morbidity of NCDs with HIV. There is an urgent need to expand healthcare capacity to provide integrated services to address these chronic conditions.

**Methods and Analysis:** This protocol describes procedures for a qualitative process evaluation of the INTE-AFRICA, a cluster-randomised trial comparing integrated health service provision for HIV-infection, DM, and hypertension, to the current stand-alone vertical care. Interviews, focus group discussions, and observations of consultations and other care processes in two clinics (Tanzania, Uganda) will be used to explore the experiences of stakeholders. These stakeholders will include health service users, policymakers, healthcare providers, community leaders and members, researchers, non-governmental (NGO) and international organisations. The exploration will be carried out during the implementation of the project, alongside an understanding of the impact of broader structural and contextual factors.

**Ethics and Dissemination:** Ethical approval has been granted by Liverpool School of Tropical Medicine (UK), the National Institute of Medical Research (Tanzania) and TASO Research Ethics Committee (Uganda). The evaluation will provide the opportunity to document the implementation of integration over several time points (six, 12 and 18 months) and refine integrated service provision prior to scale-up. This synergistic approach to evaluate, understand and respond will support service integration and inform monitoring, policy and practice development efforts to involve and educate communities in Uganda and Tanzania. It will create a model of care and a platform of best practices and lessons learnt for other countries implementing integrated and decentralised community health services.

## Key Words

Health service delivery, Non communicable disease, HIV, integration, task-shifting, sub-Saharan Africa

### Article Summary: Strengths and Limitations of this study

- The INTE-AFRICA trial will implement integration of HIV/NCD services in Tanzania and Uganda in response to an urgent need to respond to increased burden of NCDs, and expand capacity of healthcare systems to manage co-morbidity.
- The INTE-AFRICA trial is based on a partnership between African and European researchers, working closely with policy makers and other stakeholders.
- The process evaluation of INTE-AFRICA uses qualitative and observational methods at two facilities to explore and document stakeholder experiences of integration of services, alongside an understanding of the impact of broader structural and contextual factors.
- The process evaluation works in tandem with quantitative evaluation of clinical efficacy and cost effectiveness of the INTE-AFRICA trial.
- Limitations of the process evaluation may centre on patient drop out, characteristics of the two selected sites and other external mitigating factors.

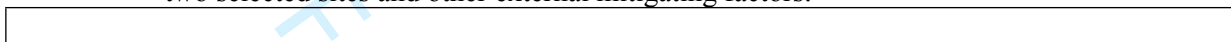

## BACKGROUND

Non-communicable diseases (NCDs) have risen rapidly in Africa, alongside a continuing high burden of HIV-infection. In the sub-Saharan Africa (SSA) region, HIV/AIDS remains a major cause of morbidity and mortality among young-middle aged adults, but the region is also experiencing a rapidly rising burden of NCDs (particularly DM and hypertension), giving rise to a dual HIV-NCD epidemic.<sup>1-3</sup> While lifestyle changes associated with urbanisation and globalization (such as eating habits and lack of physical exercise) underpin the ongoing demographic and epidemiologic transition toward increasing NCDs, these changes also affect chronic conditions (such as HIV).<sup>1-3</sup> The number of people in regular HIV care is rising<sup>4</sup>, alongside the rate of NCDs in the SSA region, with hypertension representing the single largest risk factor for death, and DM which has seen a massive increase in prevalence in a short period of time.<sup>2 5-7</sup> Patient populations in SSA are increasingly demonstrating younger age of onset of NCDs, with co-morbidity of NCDs with HIV, and the impact of NCDs is particularly severe in populations affected by poverty.<sup>3 8-11</sup>

Since 2003, significant global investment and development partner engagement has facilitated the establishment of HIV screening and treatment programmes as the first large-scale chronic disease initiatives in Africa. Health services for HIV are stand-alone and vertically delivered. They have also been combined with decentralisation and task-shifting, which has enabled primary health centres to treat large numbers of patients. Non-clinically qualified health workers play a major role in supporting patients on HIV treatment, with almost 70% of people living with HIV-infection in regular care. In contrast, health service coverage for NCDs remains very low.<sup>2 12</sup> Coordinated national NCD control and care programmes are relatively new with significant gaps in funding and operational evidence for program implementation.<sup>11 13</sup> For example, only about 5-10% of persons with DM are thought to be in regular diabetes care, and the figure is likely to be similar for persons with hypertension.<sup>2 8 11</sup> Furthermore, those in care experience insufficient health service provision for the diagnosis and management of DM and hypertension (medicines supply is patchy).<sup>2 12 14-17</sup> HIV populations at risk of developing NCDs, and presenting with co/multi-morbidities could potentially impact on the gains from the achieved scale-up of HIV care services.<sup>18</sup>

Hence, there is an urgent need to expand the capacity of healthcare systems in the SSA region to provide services for NCDs, either alongside, or integrated, with HIV.<sup>19</sup> As chronic conditions, DM, hypertension and HIV-infection require lifelong care. Key challenges to chronic care in SSA are linkage and retention in care, access and medicines adherence.<sup>20 21</sup> As such, the infrastructure and lessons learnt from the HIV chronic disease model can serve as important resources for the expansion of NCD prevention, care and treatment. HIV chronic care management pathways, resources and infrastructure can be leveraged to integrate with newly developing NCD services, ultimately to strengthen the platform for NCD services and improve health outcomes for people with NCDs.<sup>22-24</sup>

1  
2  
3 Health systems have the developed experience managing HIV as a chronic disease, including linking  
4 and retaining patients in care and supporting treatment adherence in drugs, diagnostics procurement  
5 and other key health systems indicators.<sup>21 25-27</sup> Integration can reduce duplication and fragmentation,  
6 streamline services by treat those with co/multi-morbidities, and potentially offer patient benefits  
7 relating to time and cost. See **Figure One**. It could however also threaten service capacity by  
8 resulting in increased service demand and loss of clinical focus on one disease.  
9  
10  
11  
12

13  
14 Insert **Figure One ‘Potential benefits of integrating diabetes, hypertension and HIV services for**  
15 **a) DM and hypertension control, and b HIV control’** about here  
16  
17  
18

19 Despite the increase in academic and clinical interest in HIV/NCD integration in SSA,<sup>9 26 28-33</sup> little  
20 evidence about integration in terms of both scope and generalizability exists. Extant evidence is  
21 limited to small scale feasibility studies in largely different contexts<sup>34-40</sup>, despite suggesting that  
22 integrated care is an efficient use of resources compared to the standard of care and beneficial for  
23 patients’ NCD and HIV clinical outcomes.<sup>28 30 32</sup> There is a lack of large scale or randomized and/or  
24 controlled evaluations and context-specific clinical, cost effectiveness and process outcomes data  
25 constrains policymaking and development of integrated care models, which could strengthen health  
26 systems when tailored to the distinct needs of each specific SSA country.<sup>19 21 37</sup> Such evidence is  
27 paramount to inform policy, government resource prioritisation, and to develop integrated care  
28 models which strengthen health systems best suited to the needs of that specific SSA country. The  
29 INTE-AFRICA trial is conducted to respond to the insufficient existing evidence to substantiate the  
30 benefits and sustainability of integrated care as well as implementation of such programmes in the  
31 SSA setting. We present here the qualitative process evaluation protocol designed to evaluate INTE-  
32 AFRICA, a European Commission Horizon 2020 funded implementation research project (protocol  
33 number 19-100) operating in Uganda and Tanzania.  
34  
35  
36  
37  
38  
39  
40  
41  
42  
43

#### 44 ***The INTE-AFRICA Trial***

45 INTE-AFRICA aims to implement and assess the effectiveness of integration of HIV, DM and  
46 hypertension services at the point of service delivery covering many health facilities where common  
47 approaches to clinical decision-making, drug procurement and human resource management occur.  
48 The project will generate the research evidence needed by health services in Africa, to scale-up and  
49 sustain chronic disease management and services in an integrated manner. We are also interested to  
50 observe changing dynamics pertaining to stigma and discrimination associated with HIV.<sup>41</sup>  
51  
52  
53  
54  
55  
56

57 Tanzania and Uganda were specifically chosen by INTE-AFRICA as they are low-income countries  
58 and their public and private health facilities are strongly committed to providing services for NCD.  
59 However, their health systems struggle to scale-up provision for diabetes and hypertension in the face  
60

1  
2  
3 of competing health demands, including HIV-infection. See **Table One**. Tanzania and Uganda also  
4 share relevant characteristics with other countries in SSA. As such, the process evaluation has the  
5 potential to enhance the generalisability of integrated care to other similar settings by providing  
6 understanding of the determinants and mechanisms of the implementation process.  
7  
8  
9

10  
11 Insert **Table One ‘Key data on the country settings’** about here  
12  
13

14 Our programme is underpinned by a participatory, multi-actor approach which supports dialogue and  
15 knowledge exchange, fosters mutual understanding and provides input in policy agendas around  
16 diagnosis and treatment of DM, hypertension and HIV in an integrated clinic. The INTE-AFRICA  
17 conceptual framework is illustrated in **Figure Two**.  
18  
19

20  
21  
22 Insert **Figure Two ‘INTEAFRICA Conceptual Model’** about here  
23  
24

25 INTE-AFRICA will test integrated health services at primary care centres for HIV-infection, diabetes  
26 and hypertension, by providing a “*One stop*” integrated care clinic for these conditions (the  
27 intervention). We will conduct a pragmatic parallel arm cluster-randomised trial: 32 largely urban  
28 health facilities offering primary care services in the two countries will be randomised, with 16  
29 facilities allocated to deliver the intervention immediately (intervention arm), and 16 facilities to  
30 continue with usual care (control arm). At each selected facility, cohorts of approximately 220  
31 patients; 110 HIV infected and 110 NCD patients, will be enrolled to evaluate the primary research  
32 outcomes.  
33  
34  
35  
36  
37  
38

39 The primary care facilities will initiate and stabilise patients on treatment, manage complications  
40 (including referral to higher facilities) and conduct clinical and laboratory monitoring of patients for  
41 all three conditions. Specific characteristics of integrated care in each ‘*One stop*’ integrated care clinic  
42 are: concurrent management of HIV, hypertension and DM in the same facility; management of  
43 patients with HIV, hypertension and DM by the same clinician or team of clinicians (nurses,  
44 counsellors other staff); integrated training of clinicians; single waiting area and queue; integrated  
45 health education about all three conditions; one pharmacy with a single drug dispensing point; similar  
46 testing, and cross-testing, for diagnosis and monitoring with the requisition of laboratory tests in the  
47 same place; and similar format of paper medical records for each condition kept in the same patient  
48 folder.  
49  
50  
51  
52  
53  
54

55  
56  
57 Patients who decline to participate in the research and trial participants in control arm clinics will  
58 continue to receive standard vertical health care delivery. Inclusion criteria for participation are: being  
59 over 18 years old; having confirmed HIV-infection, DM or hypertension; living within the catchment  
60

1  
2  
3 population of the health facility; likely to remain in the catchment population for six months and  
4 willing to provide written informed consent. Very ill patients requiring in-patient care will be  
5 excluded. The research team will observe participants during clinic visits with additional reviews at  
6 six and 12 months. Further details are provided in the full INTE-AFRICA trial protocol.  
7  
8  
9

### 10 11 ***Qualitative Process Evaluation of the INTE AFRICA trial***

12 The aim of the process evaluation of INTE-AFRICA is to explore the experiences, attitudes and  
13 practices of a wide variety of stakeholders during the process of programme implementation and to  
14 develop an understanding of the impact of broader structural and contextual factors on the  
15 implementation process of service integration. Process evaluations typically evaluate how and  
16 whether interventions are delivered as intended and whether such implementation is congruent with  
17 the theory underpinning the intervention.<sup>25 42-44</sup> Updated Medical Research Council (MRC) guidance  
18 for evaluation of complex health interventions has recently recognised the value of process evaluation  
19 within trials stating, “*it can be used to assess fidelity and quality of implementation, clarify causal*  
20 *mechanisms and identify contextual factors associated with variation in outcomes.*”<sup>25</sup> Hence, the  
21 process evaluation in INTE-AFRICA is particularly focused on context, description of the  
22 intervention and its causal assumptions, implementation, mechanisms of impact and outcomes.<sup>25</sup>  
23 Further we evaluate the extent to which resources and activities supporting the intervention function  
24 to deliver intended outputs, with subsequent improvements in outcomes.  
25  
26  
27  
28  
29  
30  
31  
32  
33

34 A central focus lies in identifying contextually relevant strategies for successful implementation of  
35 service integration, and practical difficulties in adoption, delivery and maintenance to inform wider  
36 implementation.<sup>45</sup> We recognise that outcomes (e.g. knowledge gained) of INTE-AFRICA are  
37 dependent on understanding cultures and contexts of the stakeholders (i.e. patients, healthcare  
38 providers, policy makers, community leaders/members, non-governmental organisations (NGO),  
39 international organisations, and clinical researchers) involved and those surrounding service design  
40 and delivery as well as care seeking practices.  
41  
42  
43  
44  
45  
46

47 The role of social and behavioural science approaches to understanding individual experience, and the  
48 role of such contextual dynamics is central to this process evaluation. It aims to enhance  
49 understanding of issues related to the NCD and HIV agendas and service delivery approaches from all  
50 perspectives and stakeholders along the integration process. INTE-AFRICA will utilise a broad social  
51 behavioural approach to support community engagement in research in Uganda and Tanzania, going  
52 beyond clinical trial recruitment and retention to improve NCD/ HIV literacy. Behavioural and social  
53 science research strategies<sup>46</sup> will allow NCD and HIV related research to place the needs and  
54 perspectives of people living with NCD and/or HIV at the centre of the progression of clinical studies,  
55 such as INTE-AFRICA, and investigate participant motivations and decision-making processes  
56  
57  
58  
59  
60

1  
2  
3 related to preferences for or participation in different types of integrated and decentralised services.  
4  
5

### 6 ***Theoretical Framework: Bronfenbrenner's ecological model of behaviour*** 7

8  
9 Process evaluation design, like healthcare interventions, requires a theoretical framework to structure  
10 the qualitative and observational evaluation across sites. The chosen theoretical framework is  
11 Bronfenbrenner's ecological model of behaviour<sup>47 48</sup> used to conceptualise integrated care as events  
12 that disrupt complex social systems<sup>49</sup> operating across multiple contextual levels. We are interested in  
13 better understanding the importance of context, which becomes especially relevant when comparing  
14 Tanzania and Uganda. For example, healthcare coverage and charging dynamics between countries  
15 and between HIV as opposed to NCD care differs. In Tanzania, whilst HIV services and drugs for  
16 HIV are free, patients are required to pay a direct user fee (unless elderly or very poor) or use their  
17 health insurance to pay for NCD drugs. Currently there is a strategy to progress to single health  
18 insurance to support universal health coverage in Tanzania. In Uganda, HIV services are also free to  
19 all (public and private not for profit health facilities) and HIV drugs are always in stock. However, in  
20 Uganda whilst NCD services are free in public facilities, stockouts of laboratory reagents and NCD  
21 drugs are frequent, and patients have to pay a direct user fee to access them. There is also no national  
22 insurance scheme in Uganda, only private insurance which is relatively expensive and optional.  
23  
24  
25  
26  
27  
28  
29  
30

31 Using the Bronfenbrenner theoretical framework, contextual factors are evaluated at the ***macro***  
32 (universal vs partial coverage; free primary healthcare and drugs, affordability and users fees; fiscal  
33 policy, financial aspects at government level, funding barriers for chronic care management and  
34 barriers to government scale-up of service integration); ***meso*** (HIV/NCD drug ordering, drug delivery  
35 systems and continuity of supply, health care provider education and employment, community  
36 understanding and perspectives on multi-morbidity); and ***micro*** (clinic and pharmacy level  
37 management, resources, patient/service user experience) levels. See **Figure Three**. These contextual  
38 factors, likely to influence implementation of integration and their effects, will be investigated to  
39 capture variation in adoption, delivery and maintenance outcomes as well as responses to the  
40 intervention. This will affect both reach and fidelity, which are hypothesised to be important factors in  
41 outcome differences.  
42  
43  
44  
45  
46  
47  
48  
49  
50

51 Insert **Figure Three 'Potential contextual influences on INTE AFRICA programme**  
52 **implementation cascade'** about here  
53  
54

55  
56 To situate INTE-AFRICA within the Bronfenbrenner theoretical framework, we will develop a logic  
57 model. This model will set out contextual determinants of HIV and NCD care management in SSA  
58  
59  
60



1  
2  
3 and assess how integrated care components function to address these determinants to improve  
4 outcomes in the management and support of patients. See **Table Two**.  
5  
6  
7

8 Insert **Table Two ‘Logic Model of programme inputs, processes and outcomes’** about here  
9  
10

## 11 **METHODS**

### 12 ***Study Setting***

13  
14 This will be a cohort study taking place in one “*One stop*” integrated care clinic per country. In  
15 Tanzania, the selected site is *Temeke Regional Referral Hospital* in Dar Es Salaam, a public tertiary  
16 health facility, with 465 staff, and serving a population of over 1 million. In Uganda, the selected site  
17 is the *Kasangati Health Centre IV*, Kasangati, a public district health facility located in the Wakiso  
18 District serving a population of over 2 million. Both provide a range of services to the community  
19 (primary care, HIV/AIDs, NCDs, surgical, maternal and child health, health education, dental and  
20 pharmacy).  
21  
22  
23  
24  
25

### 26 ***Study Design***

27  
28 This protocol describes procedures for a qualitative process evaluation of the INTE-AFRICA  
29 pragmatic parallel arm cluster-randomised trial comparing integrated health service provision for  
30 HIV-infection, DM and hypertension with the current standard vertical care delivery model. The  
31 process evaluation works in tandem with the collection of selected clinical outcomes (e.g. clinical  
32 efficacy of different treatments) and health economic data (e.g. costs and benefits of different  
33 approaches) to estimate the potential benefits to patients and health services at clinic and country level  
34 (protocol reported elsewhere).  
35  
36  
37  
38  
39  
40

### 41 ***Patient and Public Involvement***

42  
43 Patient and public involvement (PPI) throughout a programme of research enhances research quality  
44 and relevance by providing different perspectives and a sense of ownership. This protocol will adhere  
45 to the same principles, and will allow the voice of ‘*service users*’ and those affected to be heard, and  
46 utilised. Key stakeholders such as patients as service users and their families will be fully involved in  
47 guiding the research, acting as research participants, and in implementation of change in health  
48 service delivery and integrated care planning. All aspects of the process evaluation are underpinned  
49 by participatory action health research and its success and usefulness will be grounded in PPI,  
50 participation and engagement in the form of patient/professional identification of research priorities,  
51 collaborations and partnerships, expert steering, community participation around health needs and  
52 optimal integrated services, awareness raising activities, development of print materials, toolkits and  
53 training for healthcare professionals.  
54  
55  
56  
57  
58  
59  
60



1  
2  
3 It will use three qualitative research techniques: in-depth interviews with stakeholders (patients,  
4 healthcare provider, policy maker, non-governmental organisation (NGO)/international organisation,  
5 and clinical researcher); focus group discussions (FGD) with community leaders and community  
6 members; and clinic-based observations in one site per country. This design permits an assessment of  
7 the fidelity of INTE-AFRICA's implementation, a detailed description of the processes, relationships,  
8 and contexts involved in the delivery of integrated care, and the identification of factors attributing to  
9 the failure or success of the programme. It thus addresses the 'black box' problem in interpreting trial  
10 results by improving understanding of the mechanisms that connect particular intervention  
11 components to particular outcomes.<sup>50</sup> The chosen approach will enhance social construction and  
12 acceptability of chosen decentralised integrated approaches, link outcomes to policy and advocacy  
13 and impact sustainability of HIV, DM and hypertension chronic disease service integration in two  
14 LMIC countries. It provides the opportunity to document and refine INTE-AFRICA activities prior to  
15 a larger pragmatic trial or scale-up by Uganda and Tanzanian governments. These synergistic  
16 approaches to evaluate, understand and respond will support integration, support affordability, address  
17 barriers to government scale up and funding barriers for chronic care, inform surveillance, policy and  
18 practice development and improve efforts to involve and educate communities in Uganda and  
19 Tanzania. It will create a model and a platform of best practices and lessons learnt for other countries  
20 implementing integrated and decentralised community health services for HIV and chronic disease.  
21 The process evaluation methods for each objective are described in **Table Three**, including how each  
22 method maps onto the three different contextual levels.  
23  
24  
25  
26  
27  
28  
29  
30  
31  
32  
33  
34  
35

36 Insert **Table Three: 'Process Evaluation Design and data collection framework'** about here.  
37  
38

### 39 ***Study Population and Recruitment***

40  
41 25 patients and 10 health care providers in *Temeke Regional Referral Hospital* in Dar Es Salaam,  
42 Tanzania and *Kasangati Health Centre IV*, Kasangati, Uganda will be purposely selected and invited;  
43 at six, 12 and 18 months after the start of the trial, to reflect retrospectively on their experience of  
44 integration. Health care providers include the hospital/health centre overall in charge and pharmacist,  
45 and the 'One stop' medical officers in-charge, trained clinicians managing HIV, diabetes and  
46 hypertension patients, pharmacist, laboratory technician, counsellors or nurses providing health  
47 education and counselling, and nurses in the registration desk who are also responsible in taking vital  
48 signs from patients. We will also collect qualitative data from interviews with Ministerial policy  
49 makers and provincial/regional/district level clinical/health senior management (directors for NCD,  
50 HIV and curative services); NGO and international organisations (for example WHO Country office,  
51 UNAIDS, PEPFAR, CDC) and clinical researchers; and conduct FGD with community leaders and  
52 community members. These numbers are expected to reach saturation (i.e. the point that further  
53 information does not provide any additional variation in observed themes). We may replace  
54  
55  
56  
57  
58  
59  
60

1  
2  
3 participants, for example patients if there is significant loss to follow up or refusal for repeated  
4 interviews. For instance, if a participant drops out at 12 months, we still have their six-month  
5 experience documented, and we can replace with a new participant, invited to reflect on their 12-  
6 month retrospective experience. Where possible we will gender match interviewers with participants  
7 (particularly patients). Participants (patients, healthcare providers and others) will not be directly  
8 compensated but rather they will be compensated for incurred transport costs to attend the  
9 interview/FGD, and provided with refreshments during the interview/FGD.  
10  
11  
12  
13  
14

15 The following recruitment procedures will take place at each 'One stop' integrated care clinic;

- 16 • Observations will be made in the integrated clinic in consultation with the hospital/health  
17 centre and 'One stop' clinic in-charges.
- 18 • Recruitment of patients will be supported by clinic nurses who will identify and approach  
19 selected participants who have a minimum of six months experience of integration, and will  
20 be asked to consent to partake in an in-depth interview on the day they attend the clinic.  
21 INTE-AFRICA researchers will purposively sample women and men of different ages and  
22 explore any age/gender and condition ((HIV/hypertensive/DM/multi/co-morbid) related  
23 differences.
- 24 • *Health care providers* at the integrated clinic will be approached to participate in an in-depth  
25 interview on the day the INTE-AFRICA team are scheduled to attend.
- 26 • *Ministerial policy makers and provincial/regional/district level clinical/health senior  
27 management* will be identified and requested to participate in a semi-structured interview  
28 (face to face, online using Zoom or telephone).
- 29 • *NGO and international organisations* will be identified and requested to participate in a  
30 semi-structured interview (face to face or telephone).
- 31 • *Community leaders* will be identified in the clinic catchment areas by virtue of their position  
32 while *community members* will be identified in consultation with the community leaders and  
33 invited to participate in the FGDs.
- 34 • *Clinical researchers* will be invited to participate in an in depth interview at the 24 month end  
35 point.  
36  
37  
38  
39  
40  
41  
42  
43  
44  
45  
46  
47  
48  
49  
50

### 51 **Data collection**

52 We will use the Empirical Phenomenological Psychological (EPP) five-step method,<sup>51</sup> which  
53 combines psychological, interpretative and idiographic components, to collect data. The data will  
54 garner an understanding of the complex social processes, of social, aged, gendered and  
55 culturally/community specific meanings and broaden the incremental understanding of the distinct  
56 lived experience of policy makers, patients, health care providers, researchers and communities. We  
57  
58  
59  
60

1  
2  
3 will balance the description of phenomena with the interpretation of insights and are cognisant of  
4 participant experiential phenomena and authors' interpretation of associated meanings. It will yield an  
5 in-depth socio-cultural understanding of patient /participant reported outcomes, their motivations,  
6 preferences, beliefs, expectations, identities, hopes and views on conditions, related stigma and of  
7 decision-making processes. This will provide better understanding of stakeholder and community  
8 positioning during integration. This understanding will inform policy and practice, ensure effective  
9 patient/service user education, position service users and their families to understand these conditions  
10 and interpret study outcomes and facilitate future HIV and chronic disease clinical studies.  
11  
12  
13  
14  
15  
16

17 Both descriptive patient level data and rich socio-behavioural qualitative/observational data will be  
18 collected by a team of trained researchers in Tanzania and Uganda. Data collection will entail  
19 exploring the experiences, attitudes and practices of a wide variety of stakeholders during the process  
20 of INTE-AFRICA programme implementation and will develop an understanding of the impact of  
21 broader structural and contextual factors on the implementation process.<sup>10 45</sup>We will collect data on  
22 social behavioural and cultural aspects impacting implementation (e.g. individual and community  
23 health risks, protective behaviours and health responses) within the broader social and political  
24 frameworks (government resources and barriers to sustaining integration), the practicalities of  
25 accessing, providing and sustaining integrated services (e.g. staff time, resources, equity of access,  
26 supply chain dynamics and pharmacy components pertaining to drug types, drug/reagent availability  
27 and costs for integrated patients, catchment area/populations, quality of care, waiting room dynamics,  
28 record keeping and retention across multi/co-morbidities, training gaps); and process indicators (e.g.  
29 perceived stigma, acceptability of vertical versus integrated service designs, lay knowledge and  
30 awareness, the dynamics of public versus private sector integration (where relevant to the participant),  
31 and bottlenecks to accessing services). We will also describe implementation of the intervention in  
32 terms of fidelity to the intended model of care, adaptations to the intervention during implementation,  
33 and dose and reach of intervention components actually delivered and received (such as numbers and  
34 proportions of eligible staff who received integrated care training, numbers of proportions of patient  
35 participants who received all or most of their care from integrated services, and frequency of drug  
36 stock-outs). The latter data will be complemented by routinely collected quantitative data such as  
37 training attendance and medical records. We will document changes in healthcare provider roles,  
38 attitudes and patient relationships.  
39  
40  
41  
42  
43  
44  
45  
46  
47  
48  
49  
50  
51  
52  
53

54 Interviews with patients/service users, healthcare provider and policymaker/senior manager, will  
55 include specific questions about their experience and management of individuals with multi-morbid  
56 HIV, hypertension and/or diabetes. These include their perceptions of INTE-AFRICA; impacts of  
57 INTE-AFRICA on the provision of integrated HIV/AIDS care and NCD care, and relationships with  
58 NGO and international organisations; changes in health provider roles, attitudes, and patient  
59  
60

relationships; impacts of the INTE-AFRICA implementation context on trial and health economic cost outcomes; impacts of the INTE-AFRICA intervention on an integrated health systems approach to care (medicine supplies, record keeping, service user education, clinical care pathways, data management, staff training); and barriers to and facilitators of change and future sustainability of integrated care provision. We will assume a more pragmatic approach when garnering perspectives from higher level stakeholders involved in health policy and practice generation, and NGO and international organisations (e.g. WHO Country offices, UNAIDS, PEPFAR, CDC) providing peripheral supports and guidance. We are especially interested in better understanding the complexities around government scale up and resource allocation for chronic care (for example decentralisation, financial planning, identification of potential funding sources at ministry levels, subsidised NCD drugs, and by international donors (CDC, PEPFAR, UNAIDS). See **Table Three**.

### ***Data analysis and synthesis***

The analysis of qualitative data will be iterative, moving between data collection and analysis to test emerging theories. Field notes of observations will be analysed thematically to provide a description of the process and content involved in adapting and delivering the intervention. Audio recordings of interviews and FGDs will be transcribed verbatim by competent and experienced social scientists, with a subsample transcribed using conversation analytic conventions. Translation from local languages (e.g. Swahili, Luganda) into English will be performed for easy sharing with the study partners. Translation will occur using a back translation method for consistency. An electronic data management package (e.g. NVivo) will be used to manage the qualitative data analysis at the respective country levels. The analysis of the observational data will require knowledge obtained from health professional interviews at different levels to compare how reported experience, and different accounts of patient and professional perspectives relate to actual implementation of INTE-AFRICA scenarios: i) when DM and hypertension services are integrated with HIV-infection services; and ii) comparing countries. Care will be taken to identify and follow up deviant cases which do not fit into emerging theories. Reliability and validity of the analysis is optimised through iterative data collection, the use of a multi-method design incorporating interviews, FGD and observations and the ongoing discussion of findings within the research team for scrutiny and feedback.<sup>52 53</sup>

The chosen phenomenological approach (EPP) to collecting and analysing data, usually used in psychological research, reveals the structures of subjective experience and meaning of a lived phenomenon (in first person point of view). It follows to some extent Husserl's principle of active efforts to "bracket out" the researchers' theoretical pre-understanding in the first steps of a text analysis.<sup>51</sup> The "bracketing", however, does not exclude an empathetic, psychological focus in the analysis on the experiences of the researched phenomenon as it is lived by the informant and what it means is to her or him. In the context of INTE-AFRICA, researchers in both countries will strive to

1  
2  
3 get an empathetic understanding of the text, and hence do not apply their professional prior  
4 knowledge about integration. The analysis of the observational data will also require knowledge from  
5 health professional interviews to compare how reported experience relates to actual implementation of  
6 integration at the clinic level.  
7  
8  
9

10  
11 We will conduct a stepwise EPP analysis in five steps. *First*, the text will be read several times to get  
12 a good grasp of how the informant spoke about the researched phenomenon of integration. In this  
13 step, theoretical reflection will be withheld. *Second*, the whole text will be divided into meaning units  
14 of a whole paragraph or a single word. *Third*, the informant's personal language will be transformed,  
15 unit-by-unit, to the researchers' language. The researchers will discuss the transcription unit by unit.  
16 When different interpretations occur, the researchers will return to the interview text and discuss in a  
17 free, imaginative process until agreement can be reached through negotiated consensus. *Fourth*, the  
18 text will be screened in a search for comprehensive themes. The text will be interpreted with  
19 connection to the researchers' theoretical knowledge in an interchange between the original data, the  
20 transformed units and the researchers' theoretical pre-understanding about integration. The meaning  
21 units will be assorted into appropriate themes and thus constitute a general structure of the  
22 phenomenon of integrated care. *Fifth*, this essential structure will penetrate all the revealed themes  
23 and thus the meaning of the researched phenomenon of integrated care to the informant.  
24  
25  
26  
27  
28  
29  
30  
31  
32

### 33 *Credibility and transferability*

34  
35 The process evaluation protocol adheres to recommendations intended to facilitate the standardisation  
36 of process evaluation design and reporting<sup>43</sup>. It provides a unique opportunity to document  
37 implementation and collaboratively refine integrated care in two sub-Saharan African countries. This  
38 makes possible the synthesis of results of similar studies elsewhere in the SSA region in future. In  
39 order to ensure credibility, whilst we utilise different methods of data collection  
40 (qualitative/observational), and operate concurrently with clinical outcomes data and health  
41 economics analysis, we will also add a further layer of triangulation of sources in terms of  
42 perspectives across stakeholders and across conditions (HIV/hypertension/DM/multi/co-morbidity)  
43 when raising the abstraction level. Triangulation of socio-behavioural qualitative and observational  
44 data during analysis will occur in order to understand how different types of evidence enhance the  
45 overall interpretation of how INTE-AFRICA was implemented, and what the additional health  
46 economic and clinical data are, drawing case comparisons across clinics, and across countries, and  
47 developing possible explanations for implementation variation. The data, when combined and  
48 triangulated across these multi stakeholder perspectives, will provide a '*thick description*', of how the  
49 intervention was delivered, maintained and experienced by stakeholders.<sup>10 45</sup> It will also offer  
50 explanations for observed variation over time and between countries, and detailed insight into the  
51 interaction between different contextual features and components of integration of NCD or HIV/NCD  
52  
53  
54  
55  
56  
57  
58  
59  
60

1  
2  
3 services. It will also facilitate triangulation of information across stakeholders, clinics and countries.  
4 We envisage returning to these two clinics in the future, four years and six years after integration, to  
5 achieve a deeper understanding of processes and patient and provider experiences. This approach will  
6 help to support transferability to other settings, by identifying factors which are plausibly and/or  
7 consistently related to successful or unsuccessful delivery of intervention components.  
8  
9  
10

11  
12 Emerging theories and the relationship of the data to the conceptual literature underpinning the  
13 intervention will be discussed and refined at INTE-AFRICA research team meetings throughout the  
14 project. We envisage utilising the public understanding of science theory <sup>54</sup> to unpack how patients  
15 and their communities in Uganda and Tanzania understand and use different knowledge on HIV and  
16 NCDs in their lives. This could be facilitated by understanding how they create meaning from  
17 scientific findings relating to NCDs and HIV and if, how, and to what degree they incorporate these  
18 findings into their everyday lives. This theory has the capacity to shift public attitudes by connecting  
19 and communicating the development of innovative scientific concepts in the medical field (in this  
20 instance integration of HIV/NCD services in Tanzania and Uganda) to the non-scientific public, and  
21 thereby enhance education, training cascade, health policy and practice, and ultimately public  
22 understanding of multi-morbidities and sustainable routes to care. Further, it will create a platform for  
23 the sharing of lessons learnt, best practices and context adaptation of the final integrated model of care  
24 in other African countries (clinical care policies and practice, staff cascade of training, service user  
25 education and community awareness raising).  
26  
27  
28  
29  
30  
31  
32  
33  
34  
35

### 36 ***Ethical considerations***

37  
38 Ethical approval for the evaluation has been granted by the research ethics committees of the  
39 Liverpool School of Tropical Medicine (UK), the National Institute of Medical Research (Tanzania)  
40 and TASO Research Ethics Committee (Uganda). The key ethical principles of voluntary and  
41 informed participation, confidentiality and safety of participants will be used in all researcher and  
42 participant interactions. Written consent for interviews and observations will be obtained from all  
43 participants. All participants will be provided with written information about the research, this will be  
44 explained verbally, and informed that their participation is voluntary and that they may withdraw from  
45 participation at any time. Safety and confidentiality of all data will be ensured by: (1) encrypting all  
46 transcriptions with a password protected code; (2) storing all data in a secure, encrypted database  
47 accessible only to authorised persons on the research team; (3) de-linking all personal information of  
48 participants from the data collected and stored. Each participant will have a unique identification  
49 number.  
50  
51  
52  
53  
54  
55  
56  
57  
58  
59  
60



### Contributorship Statement

All authors contributed to the conceptualisation of the research and contributed to writing the manuscript.

MCVH, MB, JVL, SJ, ES, DB, CP, JO designed the process evaluation protocol.

SJ, MN, SM, JB led the development of the INTE-AFRICA trial.

MCVH drafted the manuscript and all co-authors edited and commented on subsequent drafts. All authors approved the final draft for submission. All authors agree to be accountable for all aspects of the work in ensuring that questions related to the accuracy or integrity of any part of the work are appropriately investigated and resolved.

### Funding Statement

The INTE-AFRICA project has received funding from the European Union's Horizon 2020 research and innovation programme under grant agreement No 825698. JVL is supported by a Spanish Ministry of Science, Innovation and Universities Miguel Servet grant (Instituto de Salud Carlos III/ESF, European Union [CP18/00074]) and further acknowledges support from the Spanish Ministry of Science, Innovation and Universities through the "Centro de Excelencia Severo Ochoa 2019-2023" Programme (CEX2018-000806-S), and from the Government of Catalonia through the CERCA Programme.

### Ethical approval statement

Ethical approval for the evaluation has been granted in 2019 at the Liverpool School of Tropical Medicine (UK), the National Institute of Medical Research (Tanzania) and TASO Research Ethics Committee (Uganda).

### Data sharing statement

No additional data available.

### Competing interests statement

None

### Provenance and peer review

Not commissioned; internally peer reviewed.



**Open access**

This is an open access article distributed in accordance with the Creative Commons Attribution 4.0 Unported (CC BY 4.0) license, which permits others to copy, redistribute, remix, transform and build upon this work for any purpose, provided the original work is properly cited, a link to the licence is given, and indication of whether changes were made. See: <https://creativecommons.org/licenses/by/4.0/>.

For peer review only

## References

1. Adeloje D, Basquill C. Estimating the prevalence and awareness rates of hypertension in Africa: a systematic analysis. *PLoS One* 2014;9(8):e104300.
2. Atun R, Davies JJ, Gale EAM, et al. Diabetes in sub-Saharan Africa: from clinical care to health policy. *Lancet Diabetes Endocrinol* 2017;5(8):622-67.
3. Remais JV, Zeng G, Li G, et al. Convergence of non-communicable and infectious diseases in low- and middle-income countries. *Int J Epidemiol* 2013;42(1):221-7.
4. Ford N, Ball A, Baggaley R, et al. The WHO public health approach to HIV treatment and care: looking back and looking ahead. *Lancet Infect Dis* 2018;18(3):e76-e86.
5. Global, regional, and national comparative risk assessment of 79 behavioural, environmental and occupational, and metabolic risks or clusters of risks, 1990-2015: a systematic analysis for the Global Burden of Disease Study 2015. *Lancet* 2016;388(10053):1659-724.
6. Guwatudde D, Nankya-Mutyoba J, Kalyesubula R, et al. The burden of hypertension in sub-Saharan Africa: a four-country cross sectional study. *BMC Public Health* 2015;15:1211.
7. Lim SS, Vos T, Flaxman AD, et al. A comparative risk assessment of burden of disease and injury attributable to 67 risk factors and risk factor clusters in 21 regions, 1990-2010: a systematic analysis for the Global Burden of Disease Study 2010. *Lancet* 2012;380(9859):2224-60.
8. Addo J, Smeeth L, Leon DA. Hypertension in sub-saharan Africa: a systematic review. *Hypertension* 2007;50(6):1012-8.
9. Chang AY, Gómez-Olivé FX, Manne-Goehler J, et al. Multimorbidity and care for hypertension, diabetes and HIV among older adults in rural South Africa. *Bull World Health Organ* 2019;97(1):10-23.
10. George S, McGrath N, Oni T. The association between a detectable HIV viral load and non-communicable diseases comorbidity in HIV positive adults on antiretroviral therapy in Western Cape, South Africa. *BMC Infect Dis* 2019;19(1):348.
11. Jaffar S, Gill G. The crisis of diabetes in sub-Saharan Africa. *Lancet Diabetes Endocrinol* 2017;5(8):574-75.
12. Jaffar S. Diabetes and other non-communicable diseases in Africa: a potential disaster in the waiting. *Lancet Diabetes Endocrinol* 2016;4(11):875-77.
13. Lupafya PC, Mwangomba BL, Hosig K, et al. Implementation of Policies and Strategies for Control of Noncommunicable Diseases in Malawi: Challenges and Opportunities. *Health Educ Behav* 2016;43(1 Suppl):64s-9s.
14. Katende D, Mutungi G, Baisley K, et al. Readiness of Ugandan health services for the management of outpatients with chronic diseases. *Trop Med Int Health* 2015;20(10):1385-95.
15. Manne-Goehler J, Atun R, Stokes A, et al. Diabetes diagnosis and care in sub-Saharan Africa: pooled analysis of individual data from 12 countries. *Lancet Diabetes Endocrinol* 2016;4(11):903-12.
16. Peck R, Mghamba J, Vanobberghen F, et al. Preparedness of Tanzanian health facilities for outpatient primary care of hypertension and diabetes: a cross-sectional survey. *Lancet Glob Health* 2014;2(5):e285-92.
17. Price AJ, Crampin AC, Amberbir A, et al. Prevalence of obesity, hypertension, and diabetes, and cascade of care in sub-Saharan Africa: a cross-sectional, population-based study in rural and urban Malawi. *Lancet Diabetes Endocrinol* 2018;6(3):208-22.
18. Patel P, Rose CE, Collins PY, et al. Noncommunicable diseases among HIV-infected persons in low-income and middle-income countries: a systematic review and meta-analysis. *Aids* 2018;32 Suppl 1(Suppl 1):S5-s20.
19. Haregu TN, Setswe G, Elliott J, et al. Integration of HIV/AIDS and noncommunicable diseases in developing countries: rationale, policies and models. *International Journal of Healthcare* 2015;1:21-27.

- 1
  - 2
  - 3
  - 4
  - 5
  - 6
  - 7
  - 8
  - 9
  - 10
  - 11
  - 12
  - 13
  - 14
  - 15
  - 16
  - 17
  - 18
  - 19
  - 20
  - 21
  - 22
  - 23
  - 24
  - 25
  - 26
  - 27
  - 28
  - 29
  - 30
  - 31
  - 32
  - 33
  - 34
  - 35
  - 36
  - 37
  - 38
  - 39
  - 40
  - 41
  - 42
  - 43
  - 44
  - 45
  - 46
  - 47
  - 48
  - 49
  - 50
  - 51
  - 52
  - 53
  - 54
  - 55
  - 56
  - 57
  - 58
  - 59
  - 60
20. Husain NE, Noor SK, Elmadhoun WM, et al. Diabetes, metabolic syndrome and dyslipidemia in people living with HIV in Africa: re-emerging challenges not to be forgotten. *HIV AIDS (Auckl)* 2017;9:193-202.
21. Juma K, Reid M, Roy M, et al. From HIV prevention to non-communicable disease health promotion efforts in sub-Saharan Africa: A Narrative Review. *Aids* 2018;32 Suppl 1:S63-s73.
22. Haldane V, Legido-Quigley H, Chuah FLH, et al. Integrating cardiovascular diseases, hypertension, and diabetes with HIV services: a systematic review. *AIDS Care* 2018;30(1):103-15.
23. Rabkin M, Melaku Z, Bruce K, et al. Strengthening Health Systems for Chronic Care: Leveraging HIV Programs to Support Diabetes Services in Ethiopia and Swaziland. *J Trop Med* 2012;2012:137460.
24. Some D, Edwards JK, Reid T, et al. Task Shifting the Management of Non-Communicable Diseases to Nurses in Kibera, Kenya: Does It Work? *PLoS One* 2016;11(1):e0145634.
25. Craig P, Dieppe P, Macintyre S, et al. Developing and evaluating complex interventions: the new Medical Research Council guidance. *Bmj* 2008;337:a1655.
26. Iwelunmor J, Ezechi O, Obiezu-Umeh C, et al. Capabilities, opportunities and motivations for integrating evidence-based strategy for hypertension control into HIV clinics in Southwest Nigeria. *PLoS One* 2019;14(6):e0217703.
27. Rachlis B, Naanyu V, Wachira J, et al. Identifying common barriers and facilitators to linkage and retention in chronic disease care in western Kenya. *BMC Public Health* 2016;16:741.
28. Ameh S, Klipstein-Grobusch K, Musenge E, et al. Effectiveness of an Integrated Approach to HIV and Hypertension Care in Rural South Africa: Controlled Interrupted Time-Series Analysis. *J Acquir Immune Defic Syndr* 2017;75(4):472-79.
29. Anand TN, Joseph LM, Geetha AV, et al. Task sharing with non-physician health-care workers for management of blood pressure in low-income and middle-income countries: a systematic review and meta-analysis. *Lancet Glob Health* 2019;7(6):e761-e71.
30. Divala OH, Amberbir A, Ismail Z, et al. The burden of hypertension, diabetes mellitus, and cardiovascular risk factors among adult Malawians in HIV care: consequences for integrated services. *BMC Public Health* 2016;16(1):1243.
31. Edwards JK, Bygrave H, Van den Bergh R, et al. HIV with non-communicable diseases in primary care in Kibera, Nairobi, Kenya: characteristics and outcomes 2010-2013. *Trans R Soc Trop Med Hyg* 2015;109(7):440-6.
32. Golovaty I, Sharma M, Van Heerden A, et al. Cost of Integrating Noncommunicable Disease Screening Into Home-Based HIV Testing and Counseling in South Africa. *J Acquir Immune Defic Syndr* 2018;78(5):522-26.
33. Kwarisiima D, Atukunda M, Owaraganise A, et al. Hypertension control in integrated HIV and chronic disease clinics in Uganda in the SEARCH study. *BMC Public Health* 2019;19(1):511.
34. Fairall LR, Folb N, Timmerman V, et al. Educational Outreach with an Integrated Clinical Tool for Nurse-Led Non-communicable Chronic Disease Management in Primary Care in South Africa: A Pragmatic Cluster Randomised Controlled Trial. *PLoS Med* 2016;13(11):e1002178.
35. Mahomed OH, Asmall S. Development and implementation of an integrated chronic disease model in South Africa: lessons in the management of change through improving the quality of clinical practice. *Int J Integr Care* 2015;15:e038.
36. Matanje Mwagomba BL, Ameh S, Bongomin P, et al. Opportunities and challenges for evidence-informed HIV-noncommunicable disease integrated care policies and programs: lessons from Malawi, South Africa, Swaziland and Kenya. *Aids* 2018;32 Suppl 1:S21-s32.
37. Nucho-Berenguer B, Kupfer LE. Readiness of Sub-Saharan Africa Healthcare Systems for the New Pandemic, Diabetes: A Systematic Review. *J Diabetes Res* 2018;2018:9262395.
38. Pfaff C, Scott V, Hoffman R, et al. You can treat my HIV - But can you treat my blood pressure? Availability of integrated HIV and non-communicable disease care in northern Malawi. *Afr J Prim Health Care Fam Med* 2017;9(1):e1-e8.

- 1
- 2
- 3
- 4 39. Pfaff C, Singano V, Akello H, et al. Early experiences integrating hypertension and diabetes
- 5 screening and treatment in a human immunodeficiency virus clinic in Malawi. *Int Health*
- 6 2018;10(6):495-501.
- 7 40. Rawat A, Uebel K, Moore D, et al. Integrated HIV-Care Into Primary Health Care Clinics and the
- 8 Influence on Diabetes and Hypertension Care: An Interrupted Time Series Analysis in Free
- 9 State, South Africa Over 4 Years. *J Acquir Immune Defic Syndr* 2018;77(5):476-83.
- 10 41. Jaffar S, Amuron B, Foster S, et al. Rates of virological failure in patients treated in a home-based
- 11 versus a facility-based HIV-care model in Jinja, southeast Uganda: a cluster-randomised
- 12 equivalence trial. *Lancet* 2009;374(9707):2080-89.
- 13 42. Georgeu D, Colvin CJ, Lewin S, et al. Implementing nurse-initiated and managed antiretroviral
- 14 treatment (NIMART) in South Africa: a qualitative process evaluation of the STRETCH trial.
- 15 *Implement Sci* 2012;7:66.
- 16 43. Moore G, Audrey S, Barker M, et al. Process evaluation in complex public health intervention
- 17 studies: the need for guidance. *J Epidemiol Community Health* 2014;68(2):101-2.
- 18 44. Linnan L, Steckler A. Process evaluation for public health interventions and research. An
- 19 overview. In: Steckler A, Linnan L, eds. *Process evaluation for public health interventions and*
- 20 *research*. 1st ed. San Francisco: Josset-Bass 2002:1-23.
- 21 45. Murdoch J, Curran R, Bachmann M, et al. Strengthening the quality of paediatric primary care:
- 22 protocol for the process evaluation of a health systems intervention in South Africa. *BMJ*
- 23 *Glob Health* 2018;3(Suppl 5):e000945.
- 24 46. Kippax S. Effective HIV prevention: the indispensable role of social science. *J Int AIDS Soc*
- 25 2012;15(2):17357.
- 26 47. Bronfenbrenner U. Toward an experimental ecology of human development. *American*
- 27 *Psychologist* 1977;32(7):513-31.
- 28 48. Bronfenbrenner U. *The ecology of human development: Experiments by nature and design*.
- 29 Cambridge, MA: Harvard University Press 1979.
- 30 49. Hawe P, Shiell A, Riley T. Theorising interventions as events in systems. *Am J Community Psychol*
- 31 2009;43(3-4):267-76.
- 32 50. Grimshaw JM, Zwarenstein M, Tetroe JM, et al. Looking inside the black box: a theory-based
- 33 process evaluation alongside a randomised controlled trial of printed educational materials
- 34 (the Ontario printed educational message, OPEM) to improve referral and prescribing
- 35 practices in primary care in Ontario, Canada. *Implement Sci* 2007;2:38.
- 36 51. Karlsson G. *Psychological Qualitative Research From a Phenomenological Perspective*: Almqvist &
- 37 Wiksell International 1993.
- 38 52. Marshall C, Rossman GB. *Designing qualitative research*. 4th ed. Thousands Oaks, Calif: Sage
- 39 Publications 2006.
- 40 53. Patton MQ, Patton MQ. *Qualitative research and evaluation methods*. Thousand Oaks, Calif.: Sage
- 41 Publications 2002.
- 42 54. Brossard D, Lewenstein B. *A Critical Appraisal of Models of Public Understanding of Science: Using Practice to Inform Theory* 2010:11-39.
- 43
- 44
- 45
- 46
- 47
- 48
- 49
- 50
- 51
- 52
- 53
- 54
- 55
- 56
- 57
- 58
- 59
- 60

**Table One 'Key data on the country settings'**

|                                                                    | <b>Tanzania</b> | <b>Uganda</b> |
|--------------------------------------------------------------------|-----------------|---------------|
| Income level                                                       | Low             | Low           |
| Population size                                                    | 58m<br>(2018)   | 35m<br>(2016) |
| Estimated prevalence of hypertension from STEPS survey             | 26%             | 26%           |
| Estimated prevalence of diabetes from STEPS survey <sup>15</sup> * | 5-10%           | 2-5%          |
| Estimated prevalence of HIV-infection                              | 5.1% (2017)     | 6.2% (2017)   |
| Doctors density /100,000 population                                | 3 (2014)        | 0.8 (2005)    |

\* diabetes estimate varies according to age and gender. Data are of variable quality but reference 11 shows that the overall median diabetes prevalence in 12 countries in Africa is 5%.

**Table Two ‘Logic Model of programme inputs, processes and outcomes’**

| <b>Intervention inputs</b>                                                                                                               | <b>Changes in care processes</b>                                                                                                                             | <b>Outcomes</b>                                                                                                                                                                                                                        |
|------------------------------------------------------------------------------------------------------------------------------------------|--------------------------------------------------------------------------------------------------------------------------------------------------------------|----------------------------------------------------------------------------------------------------------------------------------------------------------------------------------------------------------------------------------------|
| Negotiation with national, district and local government health departments, NGOs and funders                                            | Agreement about and support for service model, including reorganisation of clinics and staff<br>Commitment to ensure drug supply                             | <ul style="list-style-type: none"> <li>• Reorganisation of clinics and staff to implement the model</li> <li>• An effective, quality, and sustainable funded drug supply chain</li> </ul>                                              |
| Negotiating lower drug prices<br>Supporting and monitoring drug ordering in each clinic<br>Providing buffer drug supplies to each clinic | Drugs always in stock                                                                                                                                        | <ul style="list-style-type: none"> <li>• Increased diagnosis of comorbid conditions</li> <li>• Increased retention and adherence</li> <li>• Increased viral suppression, better control of blood pressure and blood glucose</li> </ul> |
| Engagement with and support for clinicians and managers in each clinic                                                                   | Clinicians and managers enable and support integration, and find solutions to emerging problems                                                              | <ul style="list-style-type: none"> <li>• Less AIDS, cardiovascular disease and diabetes complications</li> </ul>                                                                                                                       |
| Provision of integrated service in each clinic (alongside and additional to existing services)                                           | Trial participants attend integrated service<br>Avoid multiple visits for patients with multi-morbidity                                                      | <ul style="list-style-type: none"> <li>• Lower patients costs (travel and absence from work)</li> </ul>                                                                                                                                |
| Training clinicians about integrated clinical management                                                                                 | Better diagnosis and treatment including attention to comorbid conditions                                                                                    | <ul style="list-style-type: none"> <li>• Less health service duplication and costs (health service costs might increase if more patients are diagnosed and are more adherent)</li> </ul>                                               |
| Community engagement                                                                                                                     | Identify and enlist community organisations and resources to help with health education, tracing defaulters or patients who have difficulty attending clinic | <ul style="list-style-type: none"> <li>• Increase patient satisfaction</li> <li>• Increased clinician satisfaction; less burn-out and absenteeism</li> </ul>                                                                           |
| Providing standardised stationery for integrated medical records; training clinicians to use it                                          | Increased awareness by clinicians and patients about disease severity, comorbidity, adherence and control in individual patients                             | <ul style="list-style-type: none"> <li>• Reduce missed opportunities for improving care and health outcomes</li> </ul>                                                                                                                 |
| Improving monitoring and evaluation based on clinics registers and medical records                                                       | Regular data analysis and feedback to staff                                                                                                                  | Quality assurance and continuous improvement in the quality of care                                                                                                                                                                    |
| Identifying effective health education                                                                                                   | Improve health education at clinics                                                                                                                          | Healthier lifestyles<br>Increased adherence                                                                                                                                                                                            |

Table Three: 'Process Evaluation Design and data collection framework'

| Post Integration<br>* Numbers indicated are per country/.<br>Data Collection at each Site                                                                                                                                                                                                                                                                                                                                                                    | 6 months | 12 months | 18 months | Contextual level                                                                        |
|--------------------------------------------------------------------------------------------------------------------------------------------------------------------------------------------------------------------------------------------------------------------------------------------------------------------------------------------------------------------------------------------------------------------------------------------------------------|----------|-----------|-----------|-----------------------------------------------------------------------------------------|
| <i>Observations</i> of consultations, different processes and clinic flow at clinic levels and in non-clinical areas.                                                                                                                                                                                                                                                                                                                                        | 1 week   | 1 week    | 1 week    | Micro context (facility and neighbourhoods)                                             |
| <i>In depth phenomenological interviews</i> with patients/service users                                                                                                                                                                                                                                                                                                                                                                                      | 25       | 25        | 25        | Micro context (facility and neighbourhoods)                                             |
| <i>In depth phenomenological interviews</i> with health care providers at the clinic (hospital overall in charge, hospital pharmacist, the medical officers in-charge of the integrated clinic, trained clinicians managing HIV, diabetes and hypertension patients, pharmacist, laboratory technician, counsellors or nurses providing health education and counselling and nurses in the registration desk who are also responsible in taking vital signs) | 10       | 10        | 10        | Meso context (national to regional/city)<br>Micro context (facility and neighbourhoods) |
| Semi-structured interviews with Ministerial policy makers and provincial/regional/district level clinical/health senior management (Director for NCD, HIV and curative services).                                                                                                                                                                                                                                                                            | -        | 5         | 5         | Macro context (Global)<br>Meso context (national to regional/city)                      |
| <i>Semi-structured interviews</i> with NGO and international organisations (for example WHO Country office, UNAIDS, PEPFAR, CDC)                                                                                                                                                                                                                                                                                                                             | -        | 5         | 5         | Macro context (Global)<br>Meso context (national to regional/city)                      |
| <i>Focus group discussions</i> (FGD) with community leaders (8-12 participants)                                                                                                                                                                                                                                                                                                                                                                              | 1        | 1         | 1         | Micro context (facility and neighbourhoods)                                             |
| <i>Focus group discussions</i> (FGD) gender specific with community members(8-12participants)                                                                                                                                                                                                                                                                                                                                                                | 2        | 2         | 2         | Micro context (facility and neighbourhoods)                                             |
| <i>In depth phenomenological interviews</i> with clinical researchers                                                                                                                                                                                                                                                                                                                                                                                        |          |           | 4         | Micro context (facility and neighbourhoods)<br>Meso context (national to regional/city) |



Figure One 'Potential benefits of integrating diabetes, hypertension and HIV services for a) DM and hypertension control, and b) HIV control'

1  
2  
3  
4  
5  
6  
7  
8  
9  
10  
11  
12  
13  
14  
15  
16  
17  
18  
19  
20  
21  
22  
23  
24  
25  
26  
27  
28  
29  
30  
31  
32  
33  
34  
35  
36  
37  
38  
39  
40  
41

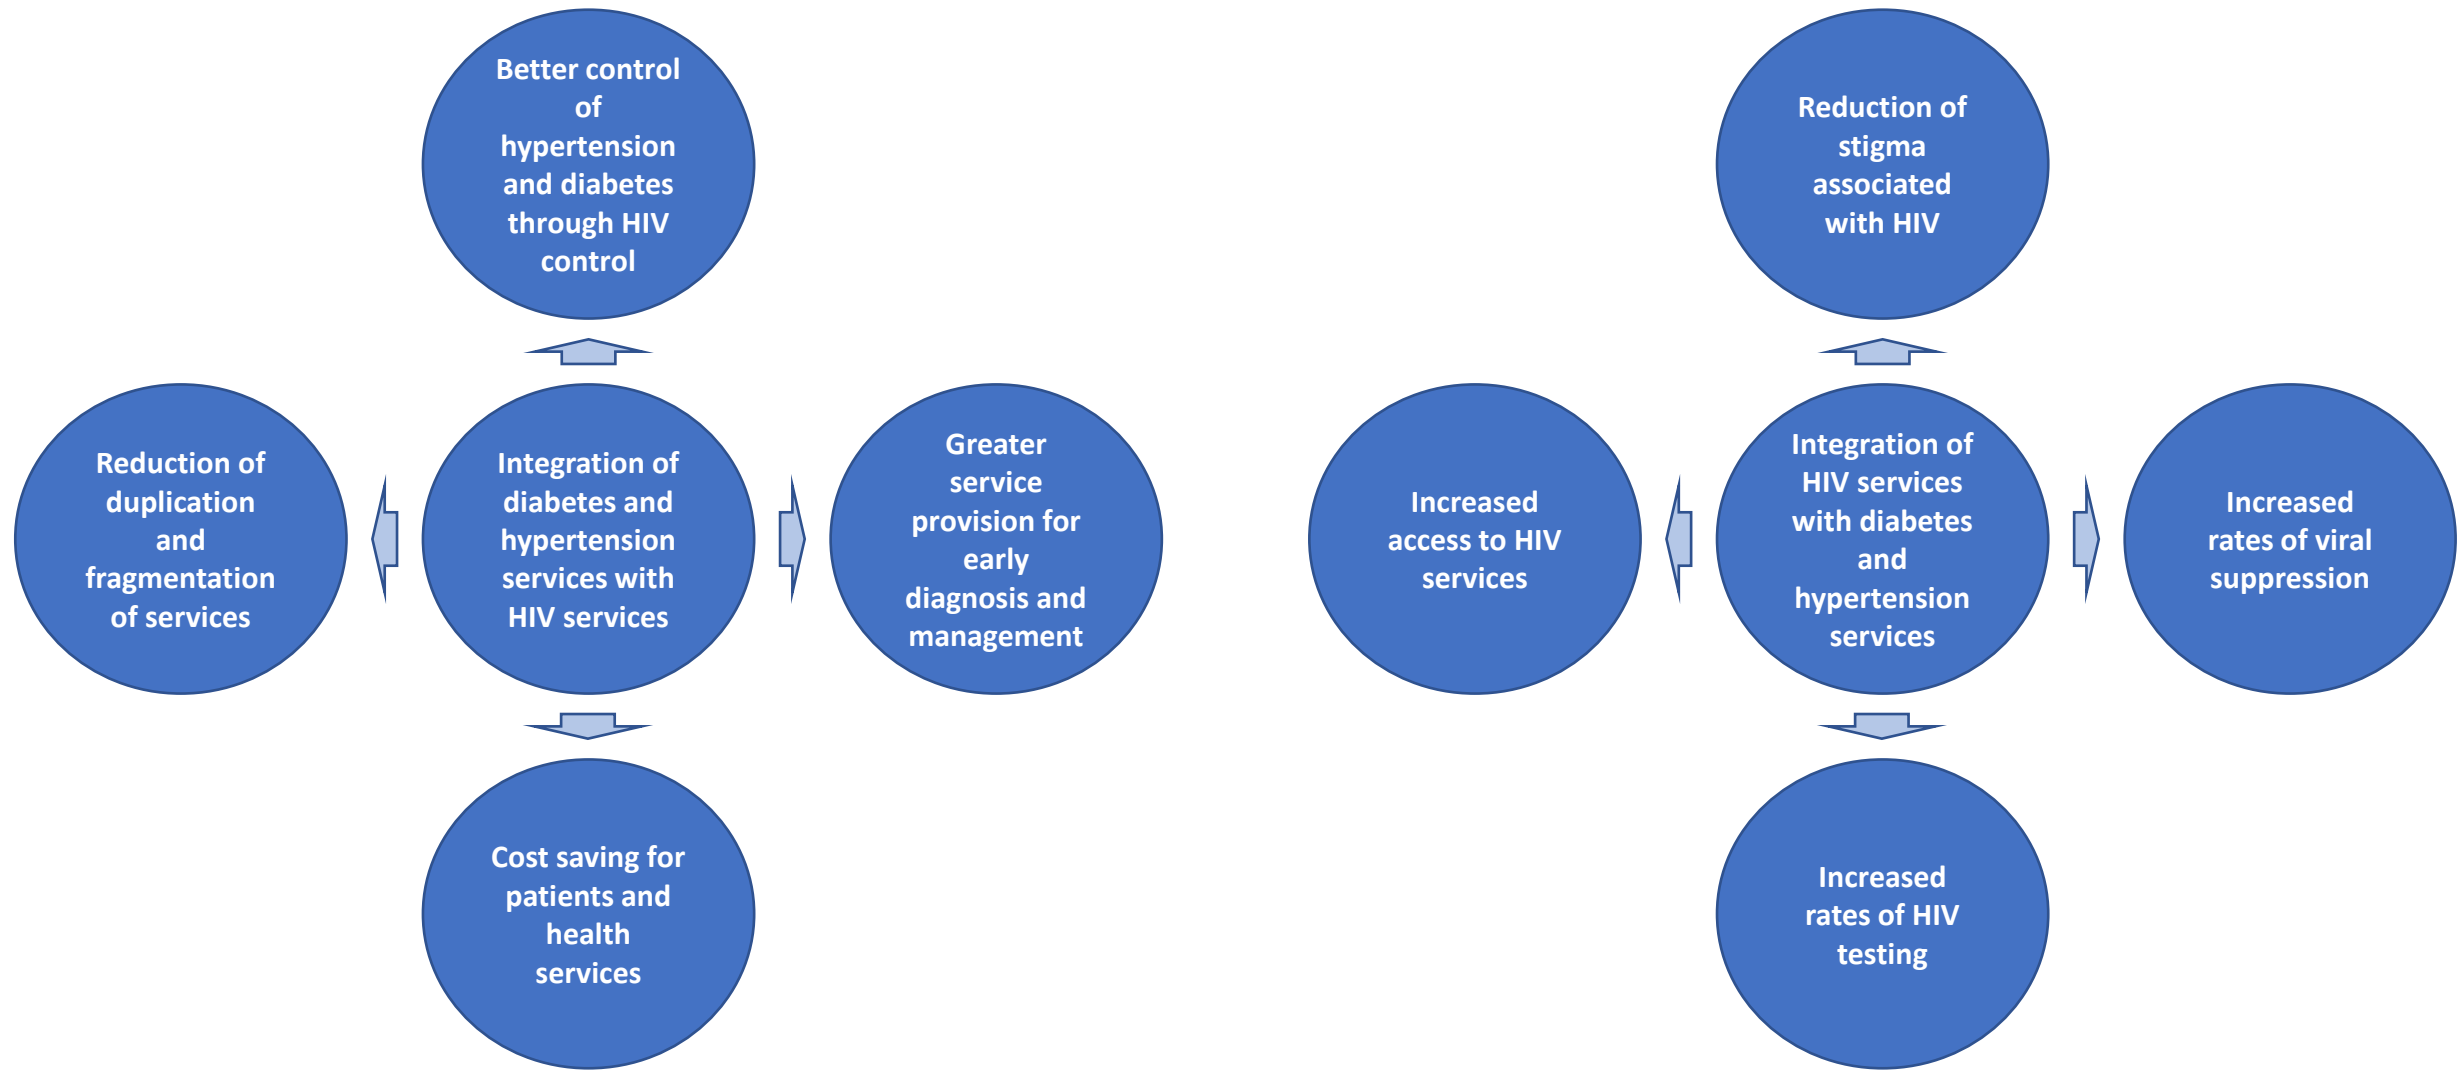

**a) Benefits for hypertension and diabetes control**

**b) Benefits for HIV-control**

Figure Two 'INTEAFRICA Conceptual Model'



1  
2  
3  
4  
5  
6  
7  
8  
9  
10  
11  
12  
13  
14  
15  
16  
17  
18  
19  
20  
21  
22  
23  
24  
25  
26  
27  
28  
29  
30  
31  
32  
33  
34  
35  
36  
37  
38  
39  
40  
41

Figure Three 'Potential contextual influences on INTEAFRICA programme implementation cascade'



1  
2  
3  
4  
5  
6  
7  
8  
9  
10  
11  
12  
13  
14  
15  
16  
17  
18  
19  
20  
21  
22  
23  
24  
25  
26  
27  
28  
29  
30  
31  
32  
33  
34  
35  
36  
37  
38  
39  
40  
41

# BMJ Open

## Strengthening integration of chronic care in Africa: protocol for the qualitative process evaluation of integrated HIV, diabetes and hypertension care in a cluster randomised controlled trial in Tanzania and Uganda.

|                                 |                                                                                                                                                                                                                                                                                                                                                                                                                                                                                                                                                                                                                                                                                                                                                                                                                                                                                                                                                                                                                                                                                                           |
|---------------------------------|-----------------------------------------------------------------------------------------------------------------------------------------------------------------------------------------------------------------------------------------------------------------------------------------------------------------------------------------------------------------------------------------------------------------------------------------------------------------------------------------------------------------------------------------------------------------------------------------------------------------------------------------------------------------------------------------------------------------------------------------------------------------------------------------------------------------------------------------------------------------------------------------------------------------------------------------------------------------------------------------------------------------------------------------------------------------------------------------------------------|
| Journal:                        | <i>BMJ Open</i>                                                                                                                                                                                                                                                                                                                                                                                                                                                                                                                                                                                                                                                                                                                                                                                                                                                                                                                                                                                                                                                                                           |
| Manuscript ID                   | bmjopen-2020-039237.R2                                                                                                                                                                                                                                                                                                                                                                                                                                                                                                                                                                                                                                                                                                                                                                                                                                                                                                                                                                                                                                                                                    |
| Article Type:                   | Protocol                                                                                                                                                                                                                                                                                                                                                                                                                                                                                                                                                                                                                                                                                                                                                                                                                                                                                                                                                                                                                                                                                                  |
| Date Submitted by the Author:   | 26-Aug-2020                                                                                                                                                                                                                                                                                                                                                                                                                                                                                                                                                                                                                                                                                                                                                                                                                                                                                                                                                                                                                                                                                               |
| Complete List of Authors:       | <p>Van Hout, Marie-Claire; Liverpool John Moores University, Public Health Institute</p> <p>Bachmann, Max; University of East Anglia Faculty of Medicine and Health Sciences, Norwich Medical School</p> <p>Lazarus, Jeffrey; Instituto de Salud Global Barcelona, Hospital Clínic, University of Barcelona;</p> <p>Shayo, Elizabeth; National Institute for Medical Research, Muhimbili Centre</p> <p>Bukenya, Dominic; Medical Research Council Uganda, MRC/UVRI/LSHTM Uganda Research Unit</p> <p>Picchio, Camila; Instituto de Salud Global Barcelona, Hospital Clinic University of Barcelona</p> <p>Nyirenda, Moffat; Medical Research Council Uganda , MRC/UVRI/LSHTM Uganda Research Unit</p> <p>Mfinanga, Sayoki; National Institute for Medical Research, Muhimbili Centre</p> <p>Birungi, Josephine; Medical Research Council Uganda , MRC/UVRI/LSHTM Uganda Research Unit</p> <p>Okebe, Joseph; Liverpool School of Tropical Medicine, Department of International Public Health</p> <p>Jaffar, Shabbar; Liverpool School of Tropical Medicine, Department of International Public Health</p> |
| <b>Primary Subject Heading</b>: | HIV/AIDS                                                                                                                                                                                                                                                                                                                                                                                                                                                                                                                                                                                                                                                                                                                                                                                                                                                                                                                                                                                                                                                                                                  |
| Secondary Subject Heading:      | Global health, Health services research, Patient-centred medicine, Diabetes and endocrinology                                                                                                                                                                                                                                                                                                                                                                                                                                                                                                                                                                                                                                                                                                                                                                                                                                                                                                                                                                                                             |
| Keywords:                       | Hypertension < CARDIOLOGY, DIABETES & ENDOCRINOLOGY, International health services < HEALTH SERVICES ADMINISTRATION & MANAGEMENT, Organisation of health services < HEALTH SERVICES ADMINISTRATION & MANAGEMENT                                                                                                                                                                                                                                                                                                                                                                                                                                                                                                                                                                                                                                                                                                                                                                                                                                                                                           |
|                                 |                                                                                                                                                                                                                                                                                                                                                                                                                                                                                                                                                                                                                                                                                                                                                                                                                                                                                                                                                                                                                                                                                                           |

1  
2  
3  
4  
5  
6  
7  
8  
9  
10  
11  
12  
13  
14  
15  
16  
17  
18  
19  
20  
21  
22  
23  
24  
25  
26  
27  
28  
29  
30  
31  
32  
33  
34  
35  
36  
37  
38  
39  
40  
41  
42  
43  
44  
45  
46  
47  
48  
49  
50  
51  
52  
53  
54  
55  
56  
57  
58  
59  
60





I, the Submitting Author has the right to grant and does grant on behalf of all authors of the Work (as defined in the below author licence), an exclusive licence and/or a non-exclusive licence for contributions from authors who are: i) UK Crown employees; ii) where BMJ has agreed a CC-BY licence shall apply, and/or iii) in accordance with the terms applicable for US Federal Government officers or employees acting as part of their official duties; on a worldwide, perpetual, irrevocable, royalty-free basis to BMJ Publishing Group Ltd ("BMJ") its licensees and where the relevant Journal is co-owned by BMJ to the co-owners of the Journal, to publish the Work in this journal and any other BMJ products and to exploit all rights, as set out in our [licence](#).

The Submitting Author accepts and understands that any supply made under these terms is made by BMJ to the Submitting Author unless you are acting as an employee on behalf of your employer or a postgraduate student of an affiliated institution which is paying any applicable article publishing charge ("APC") for Open Access articles. Where the Submitting Author wishes to make the Work available on an Open Access basis (and intends to pay the relevant APC), the terms of reuse of such Open Access shall be governed by a Creative Commons licence – details of these licences and which [Creative Commons](#) licence will apply to this Work are set out in our licence referred to above.

Other than as permitted in any relevant BMJ Author's Self Archiving Policies, I confirm this Work has not been accepted for publication elsewhere, is not being considered for publication elsewhere and does not duplicate material already published. I confirm all authors consent to publication of this Work and authorise the granting of this licence.

**Title**

Strengthening integration of chronic care in Africa: protocol for the qualitative process evaluation of integrated HIV, diabetes and hypertension care in a cluster randomised controlled trial in Tanzania and Uganda.

**Author Listing**

Marie Claire Van Hout, Liverpool John Moores University, Public Health Institute, United Kingdom

Max Bachmann, University of East Anglia, Faculty of Medicine and Health Sciences, United Kingdom

Jeffrey V Lazarus, Instituto de Salud Global Barcelona, Barcelona Institute for Global Health (ISGlobal), Hospital Clínic, University of Barcelona, Spain

Elizabeth H. Shayo, National Institute for Medical Research (NIMR), Muhimbili Centre, Tanzania

Dominic Bukenya, Medical Research Council, MRC/UVRI/LSHTM Uganda Research Unit, Uganda

Camila A Picchio, Instituto de Salud Global Barcelona (Barcelona Institute for Global Health ISGlobal), Hospital Clínic, University of Barcelona, Spain

Moffat Nyirenda, Medical Research Council, MRC/UVRI/LSHTM Uganda Research Unit, Uganda

Sayoki Mfinanga, National Institute for Medical Research (NIMR), Muhimbili Centre, Tanzania; and Liverpool School of Tropical Medicine, Department of International Public Health, United Kingdom, Muhimbili University of Health and Allied Sciences, Department of Epidemiology and Biostatistics.

Josephine Birungi, Medical Research Council, MRC/UVRI/LSHTM Uganda Research Unit, Uganda

Joseph Okebe, Liverpool School of Tropical Medicine, Department of International Public Health, United Kingdom

Shabbar Jaffar, Liverpool School of Tropical Medicine, Department of International Public Health, United Kingdom

**Corresponding Author:**

Professor Marie Claire Van Hout, Public Health Institute, Exchange Station, Liverpool John Moores University, Liverpool L32ET, United Kingdom. Email: [m.c.vanhout@ljmu.ac.uk](mailto:m.c.vanhout@ljmu.ac.uk)

**Article Type:** Protocol



## Abstract

**Introduction** In sub-Saharan Africa (SSA), the burden of non-communicable diseases (NCDs), particularly diabetes mellitus (DM) and hypertension, has increased rapidly in recent years, although HIV infection remains a leading cause of death among young-middle-aged adults. Health service coverage for NCDs remains very low in contrast to HIV, despite the increasing prevalence of comorbidity of NCDs with HIV. There is an urgent need to expand healthcare capacity to provide integrated services to address these chronic conditions.

**Methods and Analysis:** This protocol describes procedures for a qualitative process evaluation of INTE-AFRICA, a cluster-randomised trial comparing integrated health service provision for HIV-infection, DM, and hypertension, to the current stand-alone vertical care. Interviews, focus group discussions, and observations of consultations and other care processes in two clinics (in Tanzania, Uganda) will be used to explore the experiences of stakeholders. These stakeholders will include health service users, policy-makers, healthcare providers, community leaders and members, researchers, non-governmental (NGO) and international organisations. The exploration will be carried out during the implementation of the project, alongside an understanding of the impact of broader structural and contextual factors.

**Ethics and Dissemination:** Ethical approval was granted by the Liverpool School of Tropical Medicine (UK), the National Institute of Medical Research (Tanzania) and TASO Research Ethics Committee (Uganda) in 2020. The evaluation will provide the opportunity to document the implementation of integration over several timepoints (6, 12 and 18 months) and refine integrated service provision prior to scale-up. This synergistic approach to evaluate, understand and respond will support service integration and inform monitoring, policy and practice development efforts to involve and educate communities in Tanzania and Uganda. It will create a model of care and a platform of good practices and lessons learnt for other countries implementing integrated and decentralised community health services.

## Key Words

Health service delivery, Non communicable disease, HIV, integration, task-shifting, sub-Saharan Africa

### Article Summary: Strengths and Limitations of this study

- The INTE-AFRICA trial will implement integration of HIV/NCD services in Tanzania and Uganda in response to an urgent need to respond to increased burden of NCDs, and expand capacity of healthcare systems to manage comorbidity.
- The INTE-AFRICA trial is based on a partnership between African and European researchers, working closely with policy-makers and other stakeholders.
- The process evaluation of INTE-AFRICA employs qualitative and observational methods at two facilities to explore and document stakeholder experiences of integration of services, alongside an understanding of the impact of broader structural and contextual factors.
- The process evaluation works in tandem with quantitative evaluation of clinical efficacy and cost-effectiveness of the INTE-AFRICA trial.
- Limitations of the process evaluation may centre on patient drop-out, characteristics of the two selected sites, selection, information and social desirability bias and other external mitigating factors.

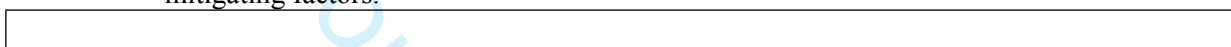

## BACKGROUND

Non-communicable diseases (NCDs) have risen rapidly in Africa, alongside a continuing high burden of HIV-infection. In sub-Saharan Africa (SSA), HIV/AIDS remains a major cause of morbidity and mortality among young-middle aged adults, but the region is also experiencing a rapidly rising burden of NCDs (particularly DM and hypertension), giving rise to a dual HIV-NCD epidemic.<sup>1-3</sup> While lifestyle changes associated with urbanisation and globalization (such as eating habits and lack of physical exercise) underpin the ongoing demographic and epidemiologic transition toward increasing NCDs, these changes also affect chronic conditions (such as HIV).<sup>1-3</sup> The number of people in regular HIV care is rising<sup>4</sup>, alongside the rate of NCDs in the SSA region, with hypertension representing the single largest risk factor for death, and DM which has seen a massive increase in prevalence in a short period of time.<sup>2 5-7</sup> Patient populations in SSA are increasingly demonstrating younger age of onset of NCDs, with comorbidity of NCDs with HIV, and the impact of NCDs is particularly severe in populations affected by poverty.<sup>3 8-11</sup>

Since 2003, significant global investment and development partner engagement has facilitated the establishment of HIV screening and treatment programmes as the first large-scale chronic disease initiatives in Africa. Health services for HIV are stand-alone and vertically delivered. They have also been combined with decentralisation and task-shifting, which has enabled primary health centres to treat large numbers of patients. Non-clinically qualified health workers play a major role in supporting patients on HIV treatment, with almost 70% of people living with HIV-infection in regular care. In contrast, health service coverage for NCDs remains very low.<sup>2 12</sup> Coordinated national NCD control and care programmes are relatively new with significant gaps in funding and operational evidence for program implementation.<sup>11 13</sup> For example, only about 5-10% of persons with DM are thought to be in regular diabetes care, and the figure is likely to be similar for persons with hypertension.<sup>2 8 11</sup> Furthermore, those in care experience insufficient health service provision for the diagnosis and management of DM and hypertension (medicines supply is patchy).<sup>2 12 14-17</sup> HIV populations at risk of developing NCDs, and presenting with co/multi-morbidities could potentially impact on the gains from the achieved scale-up of HIV care services.<sup>18</sup>

Hence, there is an urgent need to expand the capacity of healthcare systems in the SSA region to provide services for NCDs, either alongside, or integrated, with HIV.<sup>19</sup> As chronic conditions, DM, hypertension and HIV-infection require lifelong care. Key challenges to chronic care in SSA are linkage and retention in care, access and medicines adherence.<sup>20 21</sup> As such, the infrastructure and lessons learnt from the HIV chronic disease model can serve as important resources for the expansion of NCD prevention, care and treatment. HIV chronic care management pathways, resources and infrastructure can be leveraged to integrate with newly developing NCD services, ultimately to strengthen the platform for NCD services and improve health outcomes for people with NCDs.<sup>22-24</sup> Health systems have the developed experience

1  
2  
3 managing HIV as a chronic disease, including linking and retaining patients in care and supporting  
4 treatment adherence in drugs, diagnostics procurement and other key health systems indicators.<sup>21 25-27</sup>  
5 Integration can reduce duplication and fragmentation, streamline services by treat those with co/multi-  
6 morbidities, and potentially offer patient benefits relating to time and cost. See **Figure 1**. It could  
7 however also threaten service capacity by resulting in increased service demand and loss of clinical  
8 focus on one disease.  
9  
10  
11  
12  
13

14 **Figure 1 ‘Potential benefits of integrating diabetes, hypertension and HIV services for a) DM and**  
15 **hypertension control, and b HIV control’**  
16  
17  
18

19 Despite the increase in academic and clinical interest in HIV/NCD integration in SSA,<sup>9 26 28-33</sup> little  
20 evidence about integration in terms of both scope and generalizability exists. Extant evidence is limited  
21 to small scale feasibility studies in largely different contexts<sup>34-40</sup>, despite suggesting that integrated care  
22 is an efficient use of resources compared to the standard of care and beneficial for patients’ NCD and  
23 HIV clinical outcomes.<sup>28 30 32</sup> There is a lack of large scale or randomized and/or controlled evaluations  
24 and context-specific clinical, cost effectiveness and process outcomes data constrains policymaking and  
25 development of integrated care models, which could strengthen health systems when tailored to the  
26 distinct needs of each specific SSA country.<sup>19 21 37</sup> Such evidence is paramount to inform policy,  
27 government resource prioritisation, and to develop integrated care models which strengthen health  
28 systems best suited to the needs of that specific SSA country. The INTE-AFRICA trial is conducted to  
29 respond to the insufficient existing evidence to substantiate the benefits and sustainability of integrated  
30 care as well as the implementation of such programmes in the SSA setting. We present here the  
31 qualitative process evaluation protocol designed to evaluate INTE-AFRICA, a European Commission  
32 Horizon 2020 funded implementation research project (protocol number 19-100) operating in Tanzania  
33 and Uganda.  
34  
35  
36  
37  
38  
39  
40  
41  
42  
43

44 ***The INTE-AFRICA Trial***  
45

46 INTE-AFRICA aims to implement and assess the effectiveness of the integration of HIV, DM and  
47 hypertension services at the point of service delivery covering many health facilities where common  
48 approaches to clinical decision-making, drug procurement and human resource management occur. The  
49 project will generate the research evidence needed by health services in Africa, to scale-up and sustain  
50 chronic disease management and services in an integrated manner. We are also interested in observing  
51 changes in dynamics pertaining to stigma and discrimination associated with HIV.<sup>41</sup>  
52  
53  
54  
55  
56

57 INTE-AFRICA team specifically chose Tanzania and Uganda as they are low-income countries and  
58 their public and private health facilities are strongly committed to providing services for NCD.  
59 However, their health systems struggle to scale-up provision for diabetes and hypertension in the face  
60

1  
2  
3 of competing health demands, including HIV-infection. See **Table 1**. Tanzania and Uganda also share  
4 relevant characteristics with other countries in SSA. As such, the process evaluation has the potential  
5 to enhance the generalisability of integrated care to other similar settings by providing understanding  
6 of the determinants and mechanisms of the implementation process.  
7  
8  
9

### 10 11 **Table 1 ‘Key data on the country settings’**

  
12  
13

14 Our programme is underpinned by a participatory, multi-actor approach which supports dialogue and  
15 knowledge exchange, fosters mutual understanding and provides input in policy agendas around  
16 diagnosis and treatment of DM, hypertension and HIV in an integrated clinic. The INTE-AFRICA  
17 conceptual framework is illustrated in **Figure 2**.  
18  
19

### 20 21 22 **Figure 2 ‘INTEAFRICA Conceptual Model’**

  
23  
24

25 INTE-AFRICA will test integrated health services at primary care centres for HIV-infection, diabetes  
26 and hypertension, by providing a “one-stop” integrated care clinic for these conditions (the  
27 intervention). We will conduct a pragmatic parallel arm cluster-randomised trial: 32 largely urban health  
28 facilities offering primary care services in the two countries will be randomised, with 16 facilities  
29 allocated to deliver the intervention immediately (intervention arm), and 16 facilities to continue with  
30 usual care (control arm). At each selected facility, cohorts of approximately 220 patients; 110 HIV  
31 infected and 110 NCD patients, will be enrolled to evaluate the primary research outcomes.  
32  
33  
34  
35

36  
37  
38 The primary care facilities will initiate and stabilise patients on treatment, manage complications  
39 (including referral to higher facilities) and conduct clinical and laboratory monitoring of patients for all  
40 three conditions. Specific characteristics of integrated care in each ‘one stop’ integrated care clinic are:  
41 concurrent management of HIV, hypertension and DM in the same facility; management of patients  
42 with HIV, hypertension and DM by the same clinician or team of clinicians (nurses, counsellors other  
43 staff); integrated training of clinicians; single waiting area and queue; integrated health education about  
44 all three conditions; one pharmacy with a single drug dispensing point; similar testing, and cross-testing,  
45 for diagnosis and monitoring with the requisition of laboratory tests in the same place; and similar  
46 format of paper medical records for each condition kept in the same patient folder.  
47  
48  
49  
50  
51

52  
53  
54 Patients who decline to participate in the research and trial participants in control arm clinics will  
55 continue to receive standard vertical health care delivery. Inclusion criteria for participation are: being  
56 over 18 years old; having confirmed HIV-infection, DM or hypertension; living within the catchment  
57 population of the health facility; likely to remain in the catchment population for six months and willing  
58 to provide written informed consent. Very ill patients requiring in-patient care will be excluded. The  
59  
60

1  
2  
3 research team will observe participants during clinic visits with additional reviews at six and 12 months.  
4 Further details are provided in the full INTE-AFRICA trial protocol.  
5  
6  
7

### 8 ***Qualitative Process Evaluation of the INTE AFRICA trial***

9 The aim of the process evaluation of INTE-AFRICA is to explore the experiences, attitudes and  
10 practices of a wide variety of stakeholders during the process of programme implementation and to  
11 develop an understanding of the impact of broader structural and contextual factors on the  
12 implementation process of service integration. Process evaluations typically evaluate how and whether  
13 interventions are delivered as intended and whether such implementation is congruent with the theory  
14 underpinning the intervention.<sup>25 42-44</sup> Updated Medical Research Council (MRC) guidance for  
15 evaluation of complex health interventions has recently recognised the value of process evaluation  
16 within trials stating, “it can be used to assess fidelity and quality of implementation, clarify causal  
17 mechanisms and identify contextual factors associated with variation in outcomes.”<sup>25</sup> Hence, the  
18 process evaluation in INTE-AFRICA is particularly focused on context, description of the intervention  
19 and its causal assumptions, implementation, mechanisms of impact and outcomes.<sup>25</sup> Further we  
20 evaluate the extent to which resources and activities supporting the intervention function to deliver  
21 intended outputs, with subsequent improvements in outcomes.  
22  
23  
24  
25  
26  
27  
28  
29

30  
31 A central focus lies in identifying contextually relevant strategies for successful implementation of  
32 service integration, and practical difficulties in adoption, delivery and maintenance to inform wider  
33 implementation.<sup>45</sup> We recognise that outcomes (e.g. knowledge gained) of INTE-AFRICA are  
34 dependent on understanding cultures and contexts of the stakeholders (i.e. patients, healthcare  
35 providers, policy-makers, community leaders/members, non-governmental organisations (NGO),  
36 international organisations, and clinical researchers) involved and those surrounding service design and  
37 delivery as well as care seeking practices.  
38  
39  
40  
41  
42  
43

44 The role of social and behavioural science approaches to understanding individual experience, and the  
45 role of such contextual dynamics is central to this process evaluation. It aims to enhance understanding  
46 of issues related to the NCD and HIV agendas and service delivery approaches from all perspectives  
47 and stakeholders along the integration process. INTE-AFRICA will utilise a broad social behavioural  
48 approach to support community engagement in research in Tanzania and Uganda, going beyond clinical  
49 trial recruitment and retention to improve NCD/ HIV literacy. Behavioural and social science research  
50 strategies<sup>46</sup> will allow NCD and HIV related research to place the needs and perspectives of people  
51 living with NCD and/or HIV at the centre of the progression of clinical studies, such as INTE-AFRICA,  
52 and investigate participant motivations and decision-making processes related to preferences for or  
53 participation in different types of integrated and decentralised services.  
54  
55  
56  
57  
58  
59  
60

### ***Theoretical Framework: Bronfenbrenner's ecological model of behaviour***

Process evaluation design, like healthcare interventions, requires a theoretical framework to structure the qualitative and observational evaluation across sites. The chosen theoretical framework is Bronfenbrenner's ecological model of behaviour<sup>47 48</sup> used to conceptualise integrated care as events that disrupt complex social systems<sup>49</sup> operating across multiple contextual levels. We are interested in better understanding the importance of context, which becomes especially relevant when comparing Tanzania and Uganda. For example, healthcare coverage and charging dynamics between countries and between HIV as opposed to NCD care differs. In Tanzania, whilst HIV services and drugs for HIV are free, patients are required to pay a direct user fee (unless elderly or very poor) or use their health insurance to pay for NCD drugs. Currently there is a strategy to progress to single health insurance to support universal health coverage in Tanzania. In Uganda, HIV services are also free to all (public and private not for profit health facilities) and HIV drugs are always in stock. However, in Uganda whilst NCD services are free in public facilities, stockouts of laboratory reagents and NCD drugs are frequent, and patients have to pay a direct user fee to access them. There is also no national insurance scheme in Uganda, only private insurance which is relatively expensive and optional.

Using the Bronfenbrenner theoretical framework, contextual factors are evaluated at the *macro* (universal vs partial coverage; free primary healthcare and drugs, affordability and users fees; fiscal policy, financial aspects at government level, funding barriers for chronic care management and barriers to government scale-up of service integration); *meso* (HIV/NCD drug ordering, drug delivery systems and continuity of supply, health care provider education and employment, community understanding and perspectives on multimorbidity); and *micro* (clinic and pharmacy level management, resources, patient/service user experience) levels. See **Figure 3**. These contextual factors, likely to influence implementation of integration and their effects, will be investigated to capture variation in adoption, delivery and maintenance outcomes as well as responses to the intervention. This will affect both reach and fidelity, which are hypothesised to be important factors in outcome differences.

### **Figure 3 'Potential contextual influences on INTE AFRICA programme implementation cascade'**

To situate INTE-AFRICA within the Bronfenbrenner theoretical framework, we will develop a logic model. This model will set out contextual determinants of HIV and NCD care management in SSA and assess how integrated care components function to address these determinants to improve outcomes in the management and support of patients. See **Table 2**.

### **Table 2 'Logic Model of programme inputs, processes and outcomes'**



## METHODS

### *Study Setting*

This will be a cohort study taking place in one “one stop” integrated care clinic per country. In Tanzania, the selected site is *Temeke Regional Referral Hospital* in Dar Es Salaam, a public tertiary health facility, with 465 staff, and serving a population of over 1 million. In Uganda, the selected site is the *Kasangati Health Centre IV*, Kasangati, a public district health facility located in the Wakiso District serving a population of over 2 million. Both provide a range of services to the community (primary care, HIV/AIDs, NCDs, surgical, maternal and child health, health education, dental and pharmacy).

### *Study Design*

This protocol describes procedures for a qualitative process evaluation of the INTE-AFRICA pragmatic parallel arm cluster-randomised trial comparing integrated health service provision for HIV-infection, DM and hypertension with the current standard vertical care delivery model. The process evaluation works in tandem with the collection of selected clinical outcomes (e.g. clinical efficacy of different treatments) and health economic data (e.g. costs and benefits of different approaches) to estimate the potential benefits to patients and health services at clinic and country level (protocol reported elsewhere).

### *Patient and Public Involvement*

Patient and public involvement (PPI) throughout a programme of research enhances research quality and relevance by providing different perspectives and a sense of ownership. This protocol will adhere to the same principles, and will allow the voice of ‘service users’ and those affected to be heard, and utilised. Key stakeholders such as patients as service users and their families will be fully involved in guiding the research, acting as research participants, and in implementation of change in health service delivery and integrated care planning. All aspects of the process evaluation are underpinned by participatory action health research and its success and usefulness will be grounded in PPI, participation and engagement in the form of patient/professional identification of research priorities, collaborations and partnerships, expert steering, community participation around health needs and optimal integrated services, awareness raising activities, development of print materials, toolkits and training for healthcare professionals.

It will use three qualitative research techniques: in-depth interviews with stakeholders (patients, healthcare provider, policy-maker, non-governmental organisation (NGO)/international organisation, and clinical researcher); focus group discussions (FGD) with community leaders and community members; and clinic-based observations in one site per country. This design permits an assessment of the fidelity of INTE-AFRICA’s implementation, a detailed description of the processes, relationships, and contexts involved in the delivery of integrated care, and the identification of factors attributing to

1  
2  
3 the failure or success of the programme. It thus addresses the 'black box' problem in interpreting trial  
4 results by improving understanding of the mechanisms that connect particular intervention components  
5 to particular outcomes.<sup>50</sup> The chosen approach will enhance social construction and acceptability of  
6 chosen decentralised integrated approaches, link outcomes to policy and advocacy and impact  
7 sustainability of HIV, DM and hypertension chronic disease service integration in two LMIC countries.  
8 It provides the opportunity to document and refine INTE-AFRICA activities prior to a larger pragmatic  
9 trial or scale-up by Tanzanian and Ugandan governments. These synergistic approaches to evaluate,  
10 understand and respond will support integration, support affordability, address barriers to government  
11 scale up and funding barriers for chronic care, inform surveillance, policy and practice development  
12 and improve efforts to involve and educate communities in Tanzania and Uganda. It will create a model  
13 and a platform of best practices and lessons learnt for other countries implementing integrated and  
14 decentralised community health services for HIV and chronic disease. The process evaluation methods  
15 for each objective are described in **Table 3**, including how each method maps onto the three different  
16 contextual levels.  
17  
18  
19  
20  
21  
22  
23  
24  
25  
26

27 **Table 3: 'Process Evaluation Design and data collection framework'**

28  
29  
30 ***Study Population and Recruitment***

31 25 patients and 10 health care providers in *Temeke Regional Referral Hospital* in Dar Es Salaam,  
32 Tanzania and *Kasangati Health Centre IV*, Kasangati, Uganda will be purposely selected and invited;  
33 at six, 12 and 18 months after the start of the trial, to reflect retrospectively on their experience of  
34 integration. Health care providers include the hospital/health centre overall in charge and pharmacist,  
35 and the 'one stop' medical officers in-charge, trained clinicians managing HIV, diabetes and  
36 hypertension patients, pharmacist, laboratory technician, counsellors or nurses providing health  
37 education and counselling, and nurses in the registration desk who are also responsible in taking vital  
38 signs from patients. We will also collect qualitative data from interviews with Ministerial policy-makers  
39 and provincial/regional/district level clinical/health senior management (directors for NCD, HIV and  
40 curative services); NGO and international organisations (for example WHO Country office, UNAIDS,  
41 PEPFAR, CDC) and clinical researchers; and conduct FGD with community leaders and community  
42 members. These numbers are expected to reach saturation (i.e. the point that further information does  
43 not provide any additional variation in observed themes). We may replace participants, for example  
44 patients if there is significant loss to follow up or refusal for repeated interviews. For instance, if a  
45 participant drops out at 12 months, we still have their six-month experience documented, and we can  
46 replace with a new participant, invited to reflect on their 12-month retrospective experience. Where  
47 possible we will gender match interviewers with participants (particularly patients). Participants  
48 (patients, healthcare providers and others) will not be directly compensated but rather they will be  
49  
50  
51  
52  
53  
54  
55  
56  
57  
58  
59  
60

1  
2  
3 compensated for incurred transport costs to attend the interview/FGD, and provided with refreshments  
4 during the interview/FGD.  
5  
6

7 The following recruitment procedures will take place at each 'one-stop' integrated care clinic;  
8

- 9
- 10 • Observations will be made in the integrated clinic in consultation with the hospital/health centre  
11 and 'one stop' clinic in-charges.  
12
  - 13 • Recruitment of patients will be supported by clinic nurses who will identify and approach  
14 selected participants who have a minimum of six months experience of integration, and will be  
15 asked to consent to partake in an in-depth interview on the day they attend the clinic. INTE-  
16 AFRICA researchers will purposively sample women and men of different ages and explore  
17 any age/gender and condition ((HIV/hypertensive/DM/multi/co-morbid) related differences.  
18
  - 19 • *Health care providers* at the integrated clinic will be approached to participate in an in-depth  
20 interview on the day the INTE-AFRICA team are scheduled to attend.  
21
  - 22 • *Ministerial policy-makers and provincial/regional/district level clinical/health senior*  
23 *management* will be identified and requested to participate in a semi-structured interview (face  
24 to face, online using Zoom or telephone).  
25
  - 26 • *NGO and international organisations* will be identified and requested to participate in a semi-  
27 structured interview (face to face or telephone).  
28
  - 29 • *Community leaders* will be identified in the clinic catchment areas by virtue of their position  
30 while *community members* will be identified in consultation with the community leaders and  
31 invited to participate in the FGDs.  
32
  - 33 • *Clinical researchers* will be invited to participate in an in depth interview at the 24 month end  
34 point.  
35  
36  
37  
38  
39  
40

#### 41 **Data collection**

42 We will use the Empirical Phenomenological Psychological (EPP) five-step method,<sup>51</sup> which combines  
43 psychological, interpretative and idiographic components, to collect data. The data will garner an  
44 understanding of the complex social processes, of social, aged, gendered and culturally/community  
45 specific meanings and broaden the incremental understanding of the distinct lived experience of policy-  
46 makers, patients, health care providers, researchers and communities. We will balance the description  
47 of phenomena with the interpretation of insights and are cognisant of participant experiential  
48 phenomena and authors' interpretation of associated meanings. It will yield an in-depth socio-cultural  
49 understanding of patient /participant reported outcomes, their motivations, preferences, beliefs,  
50 expectations, identities, hopes and views on conditions, related stigma and of decision-making  
51 processes. This will provide better understanding of stakeholder and community positioning during  
52 integration. This understanding will inform policy and practice, ensure effective patient/service user  
53  
54  
55  
56  
57  
58  
59  
60

1  
2  
3 education, position service users and their families to understand these conditions and interpret study  
4 outcomes and facilitate future HIV and chronic disease clinical studies.  
5  
6  
7

8 Both descriptive patient level data and rich socio-behavioural qualitative/observational data will be  
9 collected by a team of trained researchers in Tanzania and Uganda. Data collection will entail exploring  
10 the experiences, attitudes and practices of a wide variety of stakeholders during the process of INTE-  
11 AFRICA programme implementation and will develop an understanding of the impact of broader  
12 structural and contextual factors on the implementation process.<sup>10 45</sup>We will collect data on social  
13 behavioural and cultural aspects impacting implementation (e.g. individual and community health risks,  
14 protective behaviours and health responses) within the broader social and political frameworks  
15 (government resources and barriers to sustaining integration), the practicalities of accessing, providing  
16 and sustaining integrated services (e.g. staff time, resources, equity of access, supply chain dynamics  
17 and pharmacy components pertaining to drug types, drug/reagent availability and costs for integrated  
18 patients, catchment area/populations, quality of care, waiting room dynamics, record keeping and  
19 retention across multi/co-morbidities, training gaps); and process indicators (e.g. perceived stigma,  
20 acceptability of vertical versus integrated service designs, lay knowledge and awareness, the dynamics  
21 of public versus private sector integration (where relevant to the participant), and bottlenecks to  
22 accessing services). We will also describe implementation of the intervention in terms of fidelity to the  
23 intended model of care, adaptations to the intervention during implementation, and dose and reach of  
24 intervention components actually delivered and received (such as numbers and proportions of eligible  
25 staff who received integrated care training, numbers of proportions of patient participants who received  
26 all or most of their care from integrated services, and frequency of drug stock-outs). The latter data will  
27 be complemented by routinely collected quantitative data such as training attendance and medical  
28 records. We will document changes in healthcare provider roles, attitudes and patient relationships.  
29  
30  
31  
32  
33  
34  
35  
36  
37  
38  
39  
40  
41  
42

43 Interviews with patients/service users, healthcare provider and policy-maker/senior manager, will  
44 include specific questions about their experience and management of individuals with multi-morbid  
45 HIV, hypertension and/or diabetes. These include their perceptions of INTE-AFRICA; impacts of  
46 INTE-AFRICA on the provision of integrated HIV/AIDS care and NCD care, and relationships with  
47 NGO and international organisations; changes in health provider roles, attitudes, and patient  
48 relationships; impacts of the INTE-AFRICA implementation context on trial and health economic cost  
49 outcomes; impacts of the INTE-AFRICA intervention on an integrated health systems approach to care  
50 (medicine supplies, record keeping, service user education, clinical care pathways, data management,  
51 staff training); and barriers to and facilitators of change and future sustainability of integrated care  
52 provision. We will assume a more pragmatic approach when garnering perspectives from higher level  
53 stakeholders involved in health policy and practice generation, and NGO and international organisations  
54 (e.g. WHO country offices, UNAIDS, PEPFAR, CDC) providing peripheral supports and guidance. We  
55  
56  
57  
58  
59  
60

1  
2  
3 are especially interested in better understanding the complexities around government scale up and  
4 resource allocation for chronic care (for example decentralisation, financial planning, identification of  
5 potential funding sources at ministry levels, subsidised NCD drugs, and by international donors (CDC,  
6 PEPFAR, UNAIDS). See **Table 3**.  
7  
8  
9

### 10 ***Data analysis and synthesis***

11 The analysis of qualitative data will be iterative, moving between data collection and analysis to test  
12 emerging theories. Field notes of observations will be analysed thematically to provide a description of  
13 the process and content involved in adapting and delivering the intervention. Audio recordings of  
14 interviews and FGDs will be transcribed verbatim by competent and experienced social scientists, with  
15 a subsample transcribed using conversation analytic conventions. Translation from local languages (e.g.  
16 Swahili, Luganda) into English will be performed for easy sharing with the study partners. Translation  
17 will occur using a back-translation method for consistency. An electronic data management package  
18 (e.g. NVivo) will be used to manage the qualitative data analysis at the respective country levels. The  
19 analysis of the observational data will require knowledge obtained from health professional interviews  
20 at different levels to compare how reported experience, and different accounts of patient and  
21 professional perspectives relate to actual implementation of INTE-AFRICA scenarios: i) when DM and  
22 hypertension services are integrated with HIV-infection services; and ii) comparing countries. Care will  
23 be taken to identify and follow up deviant cases which do not fit into emerging theories. Reliability and  
24 validity of the analysis is optimised through iterative data collection, the use of a multi-method design  
25 incorporating interviews, FGD and observations and the ongoing discussion of findings within the  
26 research team for scrutiny and feedback.<sup>52 53</sup>  
27  
28  
29  
30  
31  
32  
33  
34  
35  
36  
37  
38

39 The chosen phenomenological approach (EPP) to collecting and analysing data, usually used in  
40 psychological research, reveals the structures of subjective experience and meaning of a lived  
41 phenomenon (in first person point of view). It follows to some extent Husserl's principle of active  
42 efforts to "bracket out" the researchers' theoretical pre-understanding in the first steps of a text  
43 analysis.<sup>51</sup> The "bracketing", however, does not exclude an empathetic, psychological focus in the  
44 analysis on the experiences of the researched phenomenon as it is lived by the informant and what it  
45 means is to her or him. In the context of INTE-AFRICA, researchers in both countries will strive to get  
46 an empathetic understanding of the text, and hence do not apply their professional prior knowledge  
47 about integration. The analysis of the observational data will also require knowledge from health  
48 professional interviews to compare how reported experience relates to actual implementation of  
49 integration at the clinic level.  
50  
51  
52  
53  
54  
55  
56  
57

58 We will conduct a stepwise EPP analysis in five steps. **First**, the text will be read several times to get a  
59 good grasp of how the informant spoke about the researched phenomenon of integration. In this step,  
60

1  
2  
3 theoretical reflection will be withheld. **Second**, the whole text will be divided into meaning units of a  
4 whole paragraph or a single word. **Third**, the informant's personal language will be transformed, unit-  
5 by-unit, to the researchers' language. The researchers will discuss the transcription unit by unit. When  
6 different interpretations occur, the researchers will return to the interview text and discuss in a free,  
7 imaginative process until agreement can be reached through negotiated consensus. **Fourth**, the text will  
8 be screened in a search for comprehensive themes. The text will be interpreted with connection to the  
9 researchers' theoretical knowledge in an interchange between the original data, the transformed units  
10 and the researchers' theoretical pre-understanding about integration. The meaning units will be assorted  
11 into appropriate themes and thus constitute a general structure of the phenomenon of integrated care.  
12 **Fifth**, this essential structure will penetrate all the revealed themes and thus the meaning of the  
13 researched phenomenon of integrated care to the informant.  
14  
15  
16  
17  
18  
19  
20  
21

### 22 ***Credibility and transferability***

23 The process evaluation protocol adheres to recommendations intended to facilitate the standardisation  
24 of process evaluation design and reporting <sup>43</sup>. It provides a unique opportunity to document  
25 implementation and collaboratively refine integrated care in two sub-Saharan African countries. This  
26 makes possible the synthesis of results of similar studies elsewhere in the SSA region in future. In order  
27 to ensure credibility, whilst we utilise different methods of data collection (qualitative/observational),  
28 and operate concurrently with clinical outcomes data and health economics analysis, we will also add a  
29 further layer of triangulation of sources in terms of perspectives across stakeholders and across  
30 conditions (HIV/hypertension/DM/multi/comorbidity) when raising the abstraction level. Triangulation  
31 of socio-behavioural qualitative and observational data during analysis will occur in order to understand  
32 how different types of evidence enhance the overall interpretation of how INTE-AFRICA was  
33 implemented, and what the additional health economic and clinical data are, drawing case comparisons  
34 across clinics, and across countries, and developing possible explanations for implementation variation.  
35 The data, when combined and triangulated across these multi stakeholder perspectives, will provide a  
36 'thick description', of how the intervention was delivered, maintained and experienced by  
37 stakeholders.<sup>10 45</sup> It will also offer explanations for observed variation over time and between countries,  
38 and detailed insight into the interaction between different contextual features and components of  
39 integration of NCD or HIV/NCD services. It will also facilitate triangulation of information across  
40 stakeholders, clinics and countries. This approach will help to support transferability to other settings,  
41 by identifying factors which are plausibly and/or consistently related to successful or unsuccessful  
42 delivery of intervention components. We recognise the potential for selection and information bias as  
43 limitations of the trial itself, and mitigate by using a random sampling approach, defining characteristics  
44 in a cohort, using a standardised approach to collecting data with continual assessment of information  
45 bias, and ensuring that research personnel are unaware of participant disease status. We will address  
46 social desirability in the process evaluation by only providing brief information at the outset of the  
47  
48  
49  
50  
51  
52  
53  
54  
55  
56  
57  
58  
59  
60



1  
2  
3 evaluation in order to avoid priming, using an interview schedule approved by a panel of INTE-  
4 AFRICA experts in terms of sensitivity, conducting qualitative research using skilled interviewers with  
5 limited power relationship between interviewer and participant, conducting the interviews in a safe and  
6 secure setting where the participant feels comfortable, briefing them that there is no right and wrong  
7 answer, and finally by encouraging them to use anecdotes and experiential evidence to support their  
8 views.  
9  
10  
11  
12

13  
14 Emerging theories and the relationship of the data to the conceptual literature underpinning the  
15 intervention will be discussed and refined at INTE-AFRICA research team meetings throughout the  
16 project. We envisage utilising the public understanding of science theory<sup>54</sup> to unpack how patients and  
17 their communities in Tanzania and Uganda understand and use different knowledge on HIV and NCDs  
18 in their lives. This could be facilitated by understanding how they create meaning from scientific  
19 findings relating to NCDs and HIV and if, how, and to what degree they incorporate these findings into  
20 their everyday lives. This theory has the capacity to shift public attitudes by connecting and  
21 communicating the development of innovative scientific concepts in the medical field (in this instance  
22 integration of HIV/NCD services in Tanzania and Uganda) to the non-scientific public, and thereby  
23 enhance education, training cascade, health policy and practice, and ultimately public understanding of  
24 multi-morbidities and sustainable routes to care. Further, it will create a platform for the sharing of  
25 lessons learnt, best practices and context adaptation of the final integrated model of care in other African  
26 countries (clinical care policies and practice, staff cascade of training, service user education and  
27 community awareness raising).  
28  
29  
30  
31  
32  
33  
34  
35  
36  
37

### 38 ***Ethical considerations***

39 Ethical approval for the evaluation has been granted by the research ethics committees of the Liverpool  
40 School of Tropical Medicine (UK), the National Institute of Medical Research (Tanzania) and TASO  
41 Research Ethics Committee (Uganda). The key ethical principles of voluntary and informed  
42 participation, confidentiality and safety of participants will be used in all researcher and participant  
43 interactions. Written consent for interviews and observations will be obtained from all participants. All  
44 participants will be provided with written information about the research, this will be explained  
45 verbally, and informed that their participation is voluntary and that they may withdraw from  
46 participation at any time. Safety and confidentiality of all data will be ensured by: (1) encrypting all  
47 transcriptions with a password protected code; (2) storing all data in a secure, encrypted database  
48 accessible only to authorised persons on the research team; (3) de-linking all personal information of  
49 participants from the data collected and stored. Each participant will have a unique identification  
50 number.  
51  
52  
53  
54  
55  
56  
57  
58  
59  
60



### Contributorship Statement

All authors contributed to the conceptualisation of the research and contributed to writing the manuscript.

MCVH, MB, JVL, SJ, ES, DB, CP, JO designed the process evaluation protocol.

SJ, MN, SM, JB led the development of the INTE-AFRICA trial.

MCVH drafted the manuscript and all co-authors edited and commented on subsequent drafts. All authors approved the final draft for submission. All authors agree to be accountable for all aspects of the work in ensuring that questions related to the accuracy or integrity of any part of the work are appropriately investigated and resolved.

### Funding Statement

The INTE-AFRICA project has received funding from the European Union's Horizon 2020 research and innovation programme under grant agreement No 825698. JVL is supported by a Spanish Ministry of Science, Innovation and Universities Miguel Servet grant (Instituto de Salud Carlos III/ESF, European Union [CP18/00074]) and further acknowledges support to IS Global from the Spanish Ministry of Science, Innovation and Universities through the "Centro de Excelencia Severo Ochoa 2019-2023" Programme (CEX2018-000806-S), and from the Government of Catalonia through the CERCA Programme.

### Ethical approval statement

Ethical approval for the evaluation was granted in 2020 at the Liverpool School of Tropical Medicine (UK), the National Institute of Medical Research (Tanzania) and TASO Research Ethics Committee (Uganda).

### Data sharing statement

No additional data available.

### Competing interests statement

None

### Provenance and peer review

Not commissioned; internally peer-reviewed.

**Open access**

This is an open access article distributed in accordance with the Creative Commons Attribution 4.0 Unported (CC BY 4.0) license, which permits others to copy, redistribute, remix, transform and build upon this work for any purpose, provided the original work is properly cited, a link to the licence is given, and indication of whether changes were made. See: <https://creativecommons.org/licenses/by/4.0/>.

For peer review only

## References

1. Adeloje D, Basquill C. Estimating the prevalence and awareness rates of hypertension in Africa: a systematic analysis. *PLoS One* 2014;9(8):e104300.
2. Atun R, Davies JI, Gale EAM, et al. Diabetes in sub-Saharan Africa: from clinical care to health policy. *Lancet Diabetes Endocrinol* 2017;5(8):622-67.
3. Remais JV, Zeng G, Li G, et al. Convergence of non-communicable and infectious diseases in low- and middle-income countries. *Int J Epidemiol* 2013;42(1):221-7.
4. Ford N, Ball A, Baggaley R, et al. The WHO public health approach to HIV treatment and care: looking back and looking ahead. *Lancet Infect Dis* 2018;18(3):e76-e86.
5. Global, regional, and national comparative risk assessment of 79 behavioural, environmental and occupational, and metabolic risks or clusters of risks, 1990-2015: a systematic analysis for the Global Burden of Disease Study 2015. *Lancet* 2016;388(10053):1659-724.
6. Guwatudde D, Nankya-Mutyoba J, Kalyesubula R, et al. The burden of hypertension in sub-Saharan Africa: a four-country cross sectional study. *BMC Public Health* 2015;15:1211.
7. Lim SS, Vos T, Flaxman AD, et al. A comparative risk assessment of burden of disease and injury attributable to 67 risk factors and risk factor clusters in 21 regions, 1990-2010: a systematic analysis for the Global Burden of Disease Study 2010. *Lancet* 2012;380(9859):2224-60.
8. Addo J, Smeeth L, Leon DA. Hypertension in sub-saharan Africa: a systematic review. *Hypertension* 2007;50(6):1012-8.
9. Chang AY, Gómez-Olivé FX, Manne-Goehler J, et al. Multimorbidity and care for hypertension, diabetes and HIV among older adults in rural South Africa. *Bull World Health Organ* 2019;97(1):10-23.
10. George S, McGrath N, Oni T. The association between a detectable HIV viral load and non-communicable diseases comorbidity in HIV positive adults on antiretroviral therapy in Western Cape, South Africa. *BMC Infect Dis* 2019;19(1):348.
11. Jaffar S, Gill G. The crisis of diabetes in sub-Saharan Africa. *Lancet Diabetes Endocrinol* 2017;5(8):574-75.
12. Jaffar S. Diabetes and other non-communicable diseases in Africa: a potential disaster in the waiting. *Lancet Diabetes Endocrinol* 2016;4(11):875-77.
13. Lupafya PC, Mwagomba BL, Hosig K, et al. Implementation of Policies and Strategies for Control of Noncommunicable Diseases in Malawi: Challenges and Opportunities. *Health Educ Behav* 2016;43(1 Suppl):64s-9s.
14. Katende D, Mutungi G, Baisley K, et al. Readiness of Ugandan health services for the management of outpatients with chronic diseases. *Trop Med Int Health* 2015;20(10):1385-95.
15. Manne-Goehler J, Atun R, Stokes A, et al. Diabetes diagnosis and care in sub-Saharan Africa: pooled analysis of individual data from 12 countries. *Lancet Diabetes Endocrinol* 2016;4(11):903-12.
16. Peck R, Mghamba J, Vanobberghen F, et al. Preparedness of Tanzanian health facilities for outpatient primary care of hypertension and diabetes: a cross-sectional survey. *Lancet Glob Health* 2014;2(5):e285-92.
17. Price AJ, Crampin AC, Amberbir A, et al. Prevalence of obesity, hypertension, and diabetes, and cascade of care in sub-Saharan Africa: a cross-sectional, population-based study in rural and urban Malawi. *Lancet Diabetes Endocrinol* 2018;6(3):208-22.
18. Patel P, Rose CE, Collins PY, et al. Noncommunicable diseases among HIV-infected persons in low-income and middle-income countries: a systematic review and meta-analysis. *Aids* 2018;32 Suppl 1(Suppl 1):S5-s20.
19. Haregu TN, Setswe G, Elliott J, et al. Integration of HIV/AIDS and noncommunicable diseases in developing countries: rationale, policies and models. *International Journal of Healthcare* 2015;1:21-27.
20. Husain NE, Noor SK, Elmadhoun WM, et al. Diabetes, metabolic syndrome and dyslipidemia in people living with HIV in Africa: re-emerging challenges not to be forgotten. *HIV AIDS (Auckl)* 2017;9:193-202.

21. Juma K, Reid M, Roy M, et al. From HIV prevention to non-communicable disease health promotion efforts in sub-Saharan Africa: A Narrative Review. *Aids* 2018;32 Suppl 1:S63-s73.
22. Haldane V, Legido-Quigley H, Chuah FLH, et al. Integrating cardiovascular diseases, hypertension, and diabetes with HIV services: a systematic review. *AIDS Care* 2018;30(1):103-15.
23. Rabkin M, Melaku Z, Bruce K, et al. Strengthening Health Systems for Chronic Care: Leveraging HIV Programs to Support Diabetes Services in Ethiopia and Swaziland. *J Trop Med* 2012;2012:137460.
24. Some D, Edwards JK, Reid T, et al. Task Shifting the Management of Non-Communicable Diseases to Nurses in Kibera, Kenya: Does It Work? *PLoS One* 2016;11(1):e0145634.
25. Craig P, Dieppe P, Macintyre S, et al. Developing and evaluating complex interventions: the new Medical Research Council guidance. *Bmj* 2008;337:a1655.
26. Iwelunmor J, Ezechi O, Obiezu-Umeh C, et al. Capabilities, opportunities and motivations for integrating evidence-based strategy for hypertension control into HIV clinics in Southwest Nigeria. *PLoS One* 2019;14(6):e0217703.
27. Rachlis B, Naanyu V, Wachira J, et al. Identifying common barriers and facilitators to linkage and retention in chronic disease care in western Kenya. *BMC Public Health* 2016;16:741.
28. Ameh S, Klipstein-Grobusch K, Musenge E, et al. Effectiveness of an Integrated Approach to HIV and Hypertension Care in Rural South Africa: Controlled Interrupted Time-Series Analysis. *J Acquir Immune Defic Syndr* 2017;75(4):472-79.
29. Anand TN, Joseph LM, Geetha AV, et al. Task sharing with non-physician health-care workers for management of blood pressure in low-income and middle-income countries: a systematic review and meta-analysis. *Lancet Glob Health* 2019;7(6):e761-e71.
30. Divala OH, Amberbir A, Ismail Z, et al. The burden of hypertension, diabetes mellitus, and cardiovascular risk factors among adult Malawians in HIV care: consequences for integrated services. *BMC Public Health* 2016;16(1):1243.
31. Edwards JK, Bygrave H, Van den Bergh R, et al. HIV with non-communicable diseases in primary care in Kibera, Nairobi, Kenya: characteristics and outcomes 2010-2013. *Trans R Soc Trop Med Hyg* 2015;109(7):440-6.
32. Golovaty I, Sharma M, Van Heerden A, et al. Cost of Integrating Noncommunicable Disease Screening Into Home-Based HIV Testing and Counseling in South Africa. *J Acquir Immune Defic Syndr* 2018;78(5):522-26.
33. Kwarisiima D, Atukunda M, Owaraganise A, et al. Hypertension control in integrated HIV and chronic disease clinics in Uganda in the SEARCH study. *BMC Public Health* 2019;19(1):511.
34. Fairall LR, Folb N, Timmerman V, et al. Educational Outreach with an Integrated Clinical Tool for Nurse-Led Non-communicable Chronic Disease Management in Primary Care in South Africa: A Pragmatic Cluster Randomised Controlled Trial. *PLoS Med* 2016;13(11):e1002178.
35. Mahomed OH, Asmall S. Development and implementation of an integrated chronic disease model in South Africa: lessons in the management of change through improving the quality of clinical practice. *Int J Integr Care* 2015;15:e038.
36. Matanje Mwagomba BL, Ameh S, Bongomin P, et al. Opportunities and challenges for evidence-informed HIV-noncommunicable disease integrated care policies and programs: lessons from Malawi, South Africa, Swaziland and Kenya. *Aids* 2018;32 Suppl 1:S21-s32.
37. Nucho-Berenguer B, Kupfer LE. Readiness of Sub-Saharan Africa Healthcare Systems for the New Pandemic, Diabetes: A Systematic Review. *J Diabetes Res* 2018;2018:9262395.
38. Pfaff C, Scott V, Hoffman R, et al. You can treat my HIV - But can you treat my blood pressure? Availability of integrated HIV and non-communicable disease care in northern Malawi. *Afr J Prim Health Care Fam Med* 2017;9(1):e1-e8.
39. Pfaff C, Singano V, Akello H, et al. Early experiences integrating hypertension and diabetes screening and treatment in a human immunodeficiency virus clinic in Malawi. *Int Health* 2018;10(6):495-501.

- 1
- 2
- 3
- 4 40. Rawat A, Uebel K, Moore D, et al. Integrated HIV-Care Into Primary Health Care Clinics and the
- 5 Influence on Diabetes and Hypertension Care: An Interrupted Time Series Analysis in Free
- 6 State, South Africa Over 4 Years. *J Acquir Immune Defic Syndr* 2018;77(5):476-83.
- 7
- 8 41. Jaffar S, Amuron B, Foster S, et al. Rates of virological failure in patients treated in a home-based
- 9 versus a facility-based HIV-care model in Jinja, southeast Uganda: a cluster-randomised
- 10 equivalence trial. *Lancet* 2009;374(9707):2080-89.
- 11
- 12 42. Georgeu D, Colvin CJ, Lewin S, et al. Implementing nurse-initiated and managed antiretroviral
- 13 treatment (NIMART) in South Africa: a qualitative process evaluation of the STRETCH trial.
- 14 *Implement Sci* 2012;7:66.
- 15
- 16 43. Moore G, Audrey S, Barker M, et al. Process evaluation in complex public health intervention
- 17 studies: the need for guidance. *J Epidemiol Community Health* 2014;68(2):101-2.
- 18
- 19 44. Linnan L, Steckler A. Process evaluation for public health interventions and research. An overview.
- 20 In: Steckler A, Linnan L, eds. Process evaluation for public health interventions and research.
- 21 1st ed. San Francisco: Josset-Bass 2002:1-23.
- 22
- 23 45. Murdoch J, Curran R, Bachmann M, et al. Strengthening the quality of paediatric primary care:
- 24 protocol for the process evaluation of a health systems intervention in South Africa. *BMJ Glob*
- 25 *Health* 2018;3(Suppl 5):e000945.
- 26
- 27 46. Kippax S. Effective HIV prevention: the indispensable role of social science. *J Int AIDS Soc*
- 28 2012;15(2):17357.
- 29
- 30 47. Bronfenbrenner U. Toward an experimental ecology of human development. *American*
- 31 *Psychologist* 1977;32(7):513-31.
- 32
- 33 48. Bronfenbrenner U. The ecology of human development: Experiments by nature and design.
- 34 Cambridge, MA: Harvard University Press 1979.
- 35
- 36 49. Hawe P, Shiell A, Riley T. Theorising interventions as events in systems. *Am J Community Psychol*
- 37 2009;43(3-4):267-76.
- 38
- 39 50. Grimshaw JM, Zwarenstein M, Tetroe JM, et al. Looking inside the black box: a theory-based
- 40 process evaluation alongside a randomised controlled trial of printed educational materials
- 41 (the Ontario printed educational message, OPEM) to improve referral and prescribing
- 42 practices in primary care in Ontario, Canada. *Implement Sci* 2007;2:38.
- 43
- 44 51. Karlsson G. Psychological Qualitative Research From a Phenomenological Perspective: Almqvist &
- 45 Wiksell International 1993.
- 46
- 47 52. Marshall C, Rossman GB. Designing qualitative research. 4th ed. Thousands Oaks, Calif: Sage
- 48 Publications 2006.
- 49
- 50 53. Patton MQ, Patton MQ. Qualitative research and evaluation methods. Thousand Oaks, Calif.: Sage
- 51 Publications 2002.
- 52
- 53 54. Brossard D, Lewenstein B. A Critical Appraisal of Models of Public Understanding of Science: Using
- 54 Practice to Inform Theory 2010:11-39.
- 55
- 56
- 57
- 58
- 59
- 60

**Table 1 ‘Key data on the country settings’**

|                                                                    | <b>Tanzania</b> | <b>Uganda</b> |
|--------------------------------------------------------------------|-----------------|---------------|
| Income level                                                       | Low             | Low           |
| Population size                                                    | 58m<br>(2018)   | 35m<br>(2016) |
| Estimated prevalence of hypertension from STEPS survey             | 26%             | 26%           |
| Estimated prevalence of diabetes from STEPS survey <sup>15</sup> * | 5-10%           | 2-5%          |
| Estimated prevalence of HIV-infection                              | 5.1% (2017)     | 6.2% (2017)   |
| Doctors density /100,000 population                                | 3 (2014)        | 0.8 (2005)    |

\* diabetes estimate varies according to age and gender. Data are of variable quality but reference 11 shows that the overall median diabetes prevalence in 12 countries in Africa is 5%.

Table 2 'Logic Model of programme inputs, processes and outcomes'

| Intervention inputs                                                                                                                      | Changes in care processes                                                                                                                                    | Outcomes                                                                                                                                                                                                                                                                                                                                                                                                                                                                                                                                                                                                                                                                                                                        |
|------------------------------------------------------------------------------------------------------------------------------------------|--------------------------------------------------------------------------------------------------------------------------------------------------------------|---------------------------------------------------------------------------------------------------------------------------------------------------------------------------------------------------------------------------------------------------------------------------------------------------------------------------------------------------------------------------------------------------------------------------------------------------------------------------------------------------------------------------------------------------------------------------------------------------------------------------------------------------------------------------------------------------------------------------------|
| Negotiation with national, district and local government health departments, NGOs and funders                                            | Agreement about and support for service model, including reorganisation of clinics and staff<br>Commitment to ensure drug supply                             | <ul style="list-style-type: none"> <li>• Reorganisation of clinics and staff to implement the model</li> <li>• An effective, quality, and sustainable funded drug supply chain</li> </ul>                                                                                                                                                                                                                                                                                                                                                                                                                                                                                                                                       |
| Negotiating lower drug prices<br>Supporting and monitoring drug ordering in each clinic<br>Providing buffer drug supplies to each clinic | Drugs always in stock                                                                                                                                        | <ul style="list-style-type: none"> <li>• Increased diagnosis of comorbid conditions</li> <li>• Increased retention and adherence</li> <li>• Increased viral suppression, better control of blood pressure and blood glucose</li> <li>• Less AIDS, cardiovascular disease and diabetes complications</li> <li>• Lower patients costs (travel and absence from work)</li> <li>• Less health service duplication and costs (health service costs might increase if more patients are diagnosed and are more adherent)</li> <li>• Increase patient satisfaction</li> <li>• Increased clinician satisfaction; less burn-out and absenteeism</li> <li>• Reduce missed opportunities for improving care and health outcomes</li> </ul> |
| Engagement with and support for clinicians and managers in each clinic                                                                   | Clinicians and managers enable and support integration, and find solutions to emerging problems                                                              |                                                                                                                                                                                                                                                                                                                                                                                                                                                                                                                                                                                                                                                                                                                                 |
| Provision of integrated service in each clinic (alongside and additional to existing services)                                           | Trial participants attend integrated service<br>Avoid multiple visits for patients with multi-morbidity                                                      |                                                                                                                                                                                                                                                                                                                                                                                                                                                                                                                                                                                                                                                                                                                                 |
| Training clinicians about integrated clinical management                                                                                 | Better diagnosis and treatment including attention to comorbid conditions                                                                                    |                                                                                                                                                                                                                                                                                                                                                                                                                                                                                                                                                                                                                                                                                                                                 |
| Community engagement                                                                                                                     | Identify and enlist community organisations and resources to help with health education, tracing defaulters or patients who have difficulty attending clinic |                                                                                                                                                                                                                                                                                                                                                                                                                                                                                                                                                                                                                                                                                                                                 |
| Providing standardised stationery for integrated medical records; training clinicians to use it                                          | Increased awareness by clinicians and patients about disease severity, comorbidity, adherence and control in individual patients                             |                                                                                                                                                                                                                                                                                                                                                                                                                                                                                                                                                                                                                                                                                                                                 |
| Improving monitoring and evaluation based on clinics registers and medical records                                                       | Regular data analysis and feedback to staff                                                                                                                  | Quality assurance and continuous improvement in the quality of care                                                                                                                                                                                                                                                                                                                                                                                                                                                                                                                                                                                                                                                             |
| Identifying effective health education                                                                                                   | Improve health education at clinics                                                                                                                          | Healthier lifestyles<br>Increased adherence                                                                                                                                                                                                                                                                                                                                                                                                                                                                                                                                                                                                                                                                                     |



Table 3: 'Process Evaluation Design and data collection framework'

| Post Integration<br>* Numbers indicated are per country/.<br>Data Collection at each Site                                                                                                                                                                                                                                                                                                                                                                    | 6 months | 12 months | 18 months | Contextual level                                                                        |
|--------------------------------------------------------------------------------------------------------------------------------------------------------------------------------------------------------------------------------------------------------------------------------------------------------------------------------------------------------------------------------------------------------------------------------------------------------------|----------|-----------|-----------|-----------------------------------------------------------------------------------------|
| <i>Observations</i> of consultations, different processes and clinic flow at clinic levels and in non-clinical areas.                                                                                                                                                                                                                                                                                                                                        | 1 week   | 1 week    | 1 week    | Micro context (facility and neighbourhoods)                                             |
| <i>In depth phenomenological interviews</i> with patients/service users                                                                                                                                                                                                                                                                                                                                                                                      | 25       | 25        | 25        | Micro context (facility and neighbourhoods)                                             |
| <i>In depth phenomenological interviews</i> with health care providers at the clinic (hospital overall in charge, hospital pharmacist, the medical officers in-charge of the integrated clinic, trained clinicians managing HIV, diabetes and hypertension patients, pharmacist, laboratory technician, counsellors or nurses providing health education and counselling and nurses in the registration desk who are also responsible in taking vital signs) | 10       | 10        | 10        | Meso context (national to regional/city)<br>Micro context (facility and neighbourhoods) |
| Semi-structured interviews with Ministerial policy-makers and provincial/regional/district level clinical/health senior management (Director for NCD, HIV and curative services).                                                                                                                                                                                                                                                                            | -        | 5         | 5         | Macro context (Global)<br>Meso context (national to regional/city)                      |
| <i>Semi-structured interviews</i> with NGO and international organisations (for example WHO Country office, UNAIDS, PEPFAR, CDC)                                                                                                                                                                                                                                                                                                                             | -        | 5         | 5         | Macro context (Global)<br>Meso context (national to regional/city)                      |
| <i>Focus group discussions</i> (FGD) with community leaders (8-12 participants)                                                                                                                                                                                                                                                                                                                                                                              | 1        | 1         | 1         | Micro context (facility and neighbourhoods)                                             |
| <i>Focus group discussions</i> (FGD) gender specific with community members(8-12participants)                                                                                                                                                                                                                                                                                                                                                                | 2        | 2         | 2         | Micro context (facility and neighbourhoods)                                             |
| <i>In depth phenomenological interviews</i> with clinical researchers                                                                                                                                                                                                                                                                                                                                                                                        |          |           | 4         | Micro context (facility and neighbourhoods)<br>Meso context (national to regional/city) |

Figure One 'Potential benefits of integrating diabetes, hypertension and HIV services for a) DM and hypertension control, and b) HIV control'

1  
2  
3  
4  
5  
6  
7  
8  
9  
10  
11  
12  
13  
14  
15  
16  
17  
18  
19  
20  
21  
22  
23  
24  
25  
26  
27  
28  
29  
30  
31  
32  
33  
34  
35  
36  
37  
38  
39  
40  
41



**a) Benefits for hypertension and diabetes control**

**b) Benefits for HIV-control**

Figure Two 'INTEAFRICA Conceptual Model'

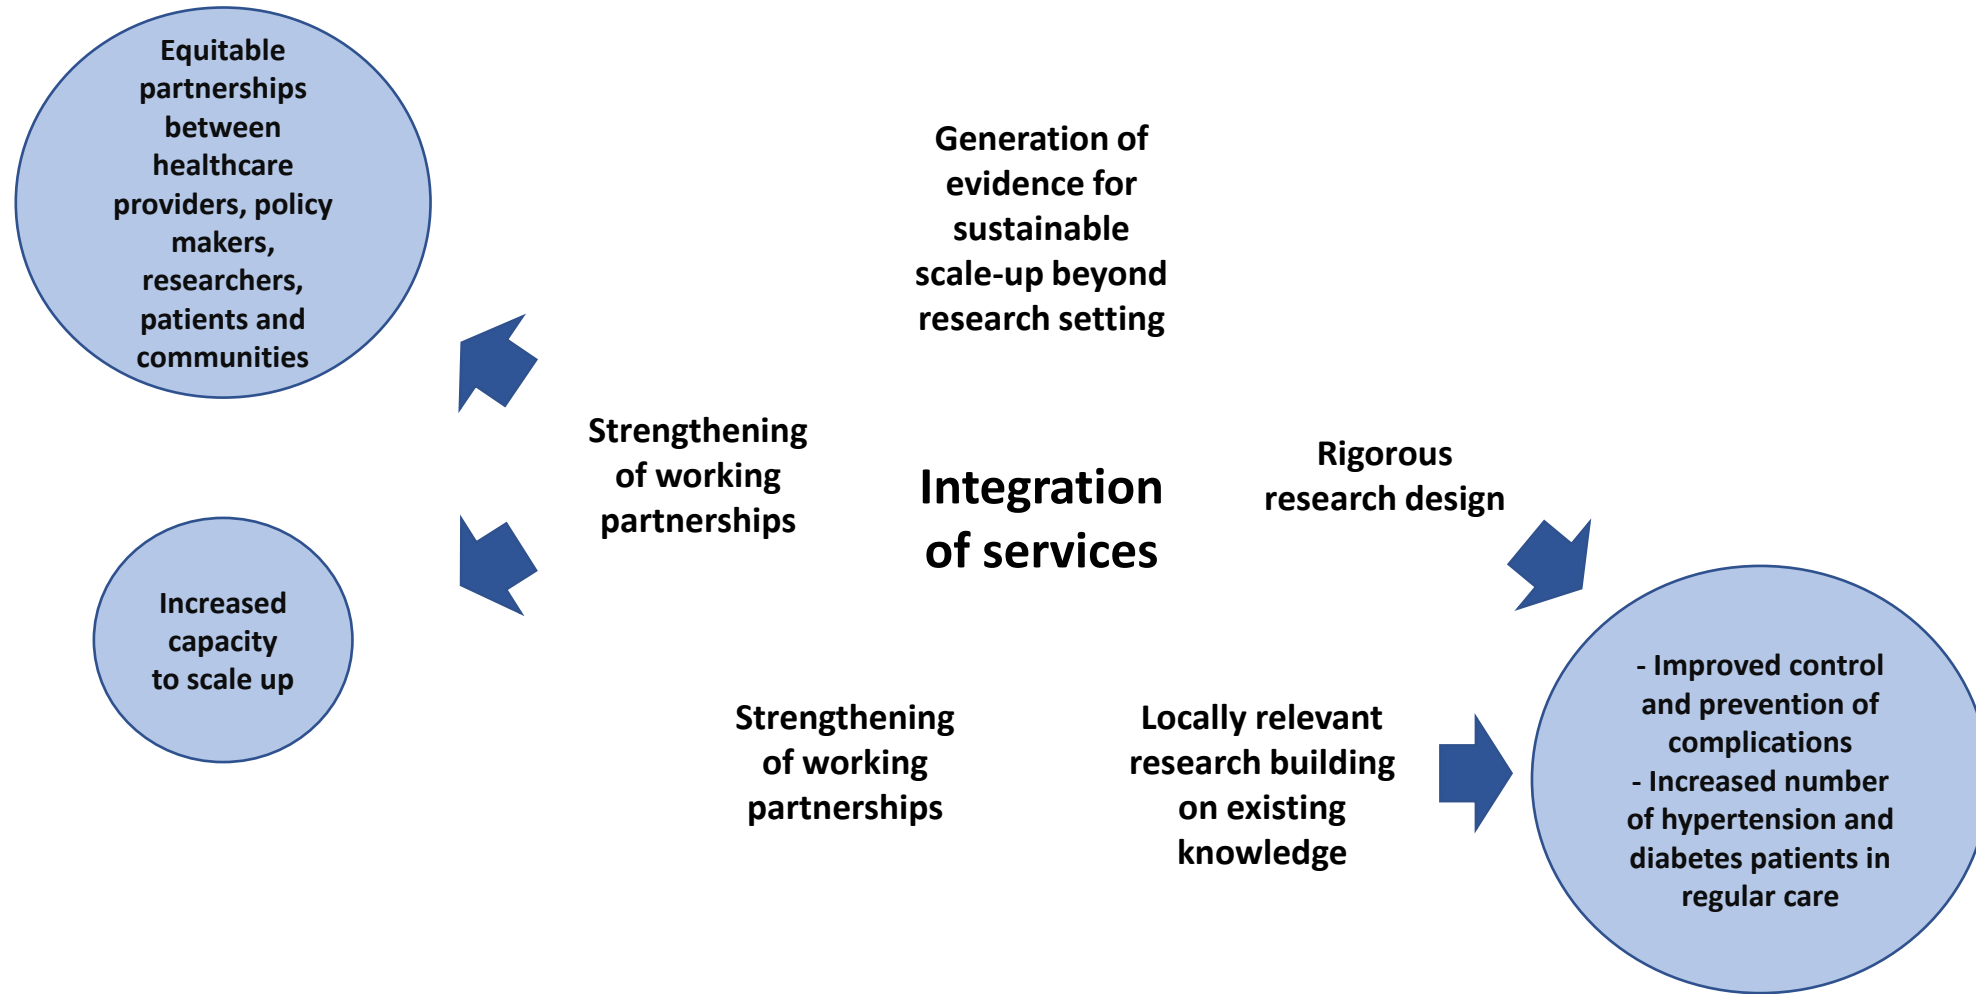

1  
2  
3  
4  
5  
6  
7  
8  
9  
10  
11  
12  
13  
14  
15  
16  
17  
18  
19  
20  
21  
22  
23  
24  
25  
26  
27  
28  
29  
30  
31  
32  
33  
34  
35  
36  
37  
38  
39  
40  
41

Figure Three 'Potential contextual influences on INTEAFRICA programme implementation cascade'



1  
2  
3  
4  
5  
6  
7  
8  
9  
10  
11  
12  
13  
14  
15  
16  
17  
18  
19  
20  
21  
22  
23  
24  
25  
26  
27  
28  
29  
30  
31  
32  
33  
34  
35  
36  
37  
38  
39  
40  
41
